# Supplementary material for: Discovery and biological evaluation of nitrofuranyl–pyrazolopyrimidine hybrid conjugates as potent antimicrobial agents targeting Staphylococcus aureus and methicillin-resistant S. aureus
Source: Royal Society of Chemistry journal article supplement (doi:10.1039/d4md00826j), 2024-12-26
Supplement: d4md00826j1.pdf [file d4md00826j1.pdf]

## Supporting Information

### Discovery and Biological Evaluation of Nitrofuranyl-Pyrazolopyrimidine Hybrid Conjugates as Potent Antimicrobial Agents Targeting *Staphylococcus aureus* and Methicillin-resistant *Staphylococcus aureus*

Sapna Saini,<sup>€,\\$,†</sup> G. Lakshma Reddy,<sup>§,\\$,†</sup> Anjali Gangwar,<sup>€,¥</sup> Harpreet Kour,<sup>§,\\$</sup> Gajanan G. Nadre,<sup>£,\\$</sup> Ramajayan Pandian,<sup>¶,¥</sup> Sunny Pal,<sup>€</sup> Utpal Nandi,<sup>¶,\\$,≠</sup> Rashmi Sharma,<sup>€,¥</sup> \* Sanghapal D. Sawant<sup>§,£,\\$</sup> \*

<sup>§</sup>Natural Products and Medicinal Chemistry Division, CSIR-Indian Institute of Integrative Medicine, Canal Road, Jammu-180001, India

<sup>€</sup>Infectious Diseases Division, CSIR – Indian Institute of Integrative Medicine, Canal Road, Jammu – 180001, India

<sup>£</sup>Organic Chemistry Division, CSIR-National Chemical Laboratory, Dr. Homi Bhabha Road, Pune-411008, India

<sup>¶</sup>Pharmacology Division, CSIR – Indian Institute of Integrative Medicine, Canal Road, Jammu – 180001

<sup>¥</sup>Academy of Scientific and Innovative Research, Ghaziabad- 201002, India

<sup>≠</sup>Department of Chemical Sciences, Unified Academic Campus, Bose Institute, Kolkata - 700 091, India

\*To whom correspondence should be addressed:

Dr. Rashmi Sharma, Infectious Diseases Division, CSIR- Indian Institute of Integrative Medicine, Jammu, India-180001; Academy of Scientific and Innovative Research (AcSIR), Ghaziabad 201002, India

E-mail: [rashmi.sharma.09@iiim.res.in](mailto:rashmi.sharma.09@iiim.res.in)

Dr. Sanghapal D. Sawant, Natural Products and Medicinal Chemistry Division, CSIR-Indian Institute of Integrative Medicine, Jammu 180001, India; Organic Chemistry Division, CSIR-National Chemical Laboratory, Pune 411008, India; Academy of Scientific and Innovative Research (AcSIR), Ghaziabad 201002, India; [orcid.org/0000-0002-6224-3214](https://orcid.org/0000-0002-6224-3214);

Email: [sd.sawant@ncl.res.in](mailto:sd.sawant@ncl.res.in)

<sup>†</sup>Equal contribution as first author to this work.

## Table of Contents

| S. No. | Contents                     | Page Nos. |
|--------|------------------------------|-----------|
| 1.0    | Scanned spectra of compounds | S3-S116   |
|        |                              |           |

## 1.0. Scanned spectra

### Compound (8)

#### $^1\text{H}$ NMR in $\text{DMSO-d}_6$

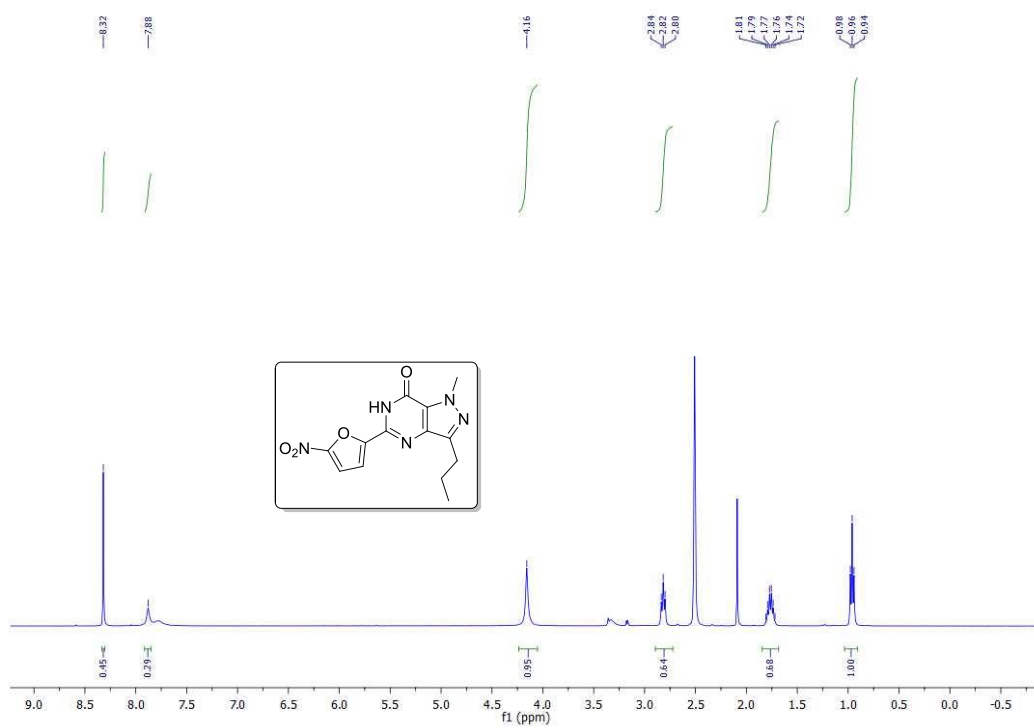

#### $^{13}\text{C}$ NMR in $\text{DMSO-d}_6$

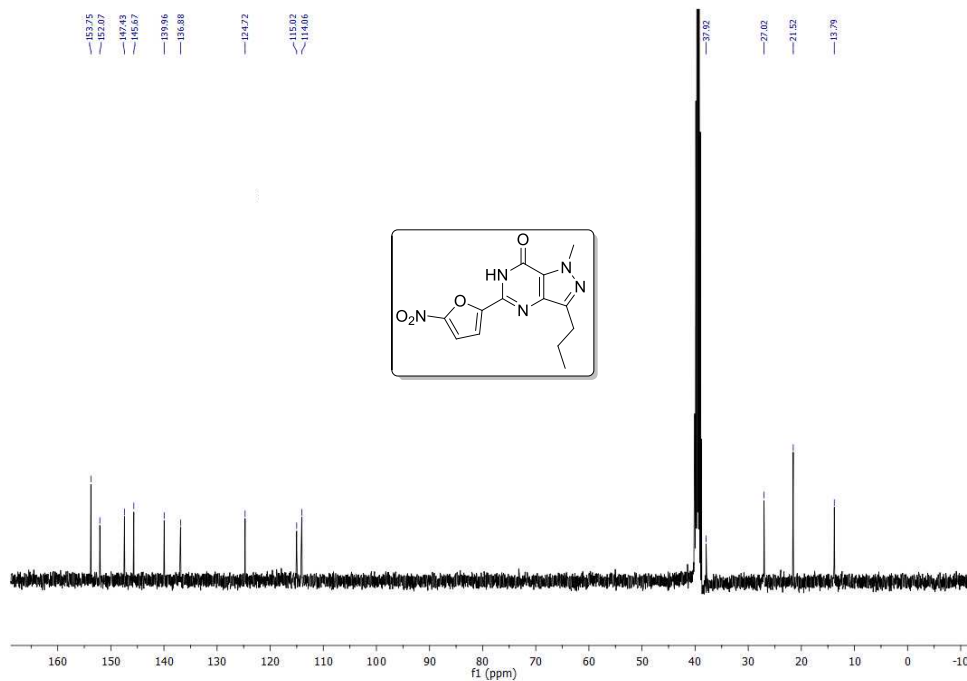

## HRMS

## Qualitative Compound Report

**Data File** daily ms0032.d **Sample Name** 4  
**Sample Type** Sample **Position** 26  
**Instrument Name** Instrument 1 **User Name**  
**Acq Method** DAILY MS DESI.m **Acquired Time** 1/18/2012 11:41:39 AM  
**IRM Calibration Status** Success **DA Method** as.m  
**Comment**

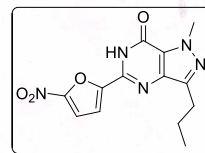

**Sample Group** Info.

## Compound Table

| Compound Label        | RT    | Mass      | Formula       | MFG Formula   | MFG Diff (ppm) | DB Formula    |
|-----------------------|-------|-----------|---------------|---------------|----------------|---------------|
| Cpd 30: C13 H13 N5 O4 | 0.236 | 303.09682 | C13 H13 N5 O4 | C13 H13 N5 O4 | -0.21          | C13 H13 N5 O4 |

| Compound Label        | m/z       | RT    | Algorithm                 | Mass      |
|-----------------------|-----------|-------|---------------------------|-----------|
| Cpd 30: C13 H13 N5 O4 | 304.10409 | 0.236 | Find by Molecular Feature | 303.09682 |

## MFE MS Spectrum

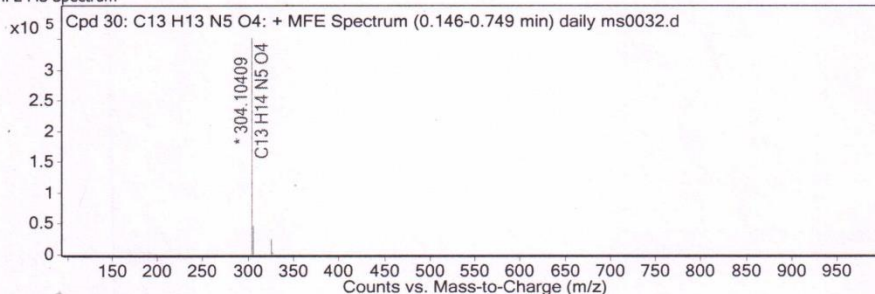

## MS Spectrum Peak List

| m/z       | z | Abund    | Formula          | Ion     |
|-----------|---|----------|------------------|---------|
| 304.10409 | 1 | 352052.5 | C13 H14 N5 O4    | (M+H)+  |
| 305.10722 | 1 | 46982.8  | C13 H14 N5 O4    | (M+H)+  |
| 306.10937 | 1 | 5822.5   | C13 H14 N5 O4    | (M+H)+  |
| 307.11129 | 1 | 595.1    | C13 H14 N5 O4    | (M+H)+  |
| 326.08634 | 1 | 24963.2  | C13 H13 N5 Na O4 | (M+Na)+ |
| 327.08911 | 1 | 3812.6   | C13 H13 N5 Na O4 | (M+Na)+ |
| 328.0897  | 1 | 744      | C13 H13 N5 Na O4 | (M+Na)+ |

## Predicted Isotope Match Table

| Isotope | m/z       | Calc m/z  | Diff (ppm) | Abund % | Calc Abund % | Abund Sum % | Calc Abund Sum % |
|---------|-----------|-----------|------------|---------|--------------|-------------|------------------|
| 1       | 304.10409 | 304.10403 | -0.21      | 100     | 100          | 86.83       | 84.43            |
| 2       | 305.10722 | 305.10671 | -1.66      | 13.35   | 16.2         | 11.59       | 13.68            |
| 3       | 306.10937 | 306.10891 | -1.48      | 1.65    | 2.05         | 1.44        | 1.73             |
| 4       | 307.11129 | 307.11124 | -0.16      | 0.17    | 0.19         | 0.15        | 0.16             |

--- End Of Report ---



# HPLC

## <Chromatogram>

mAU

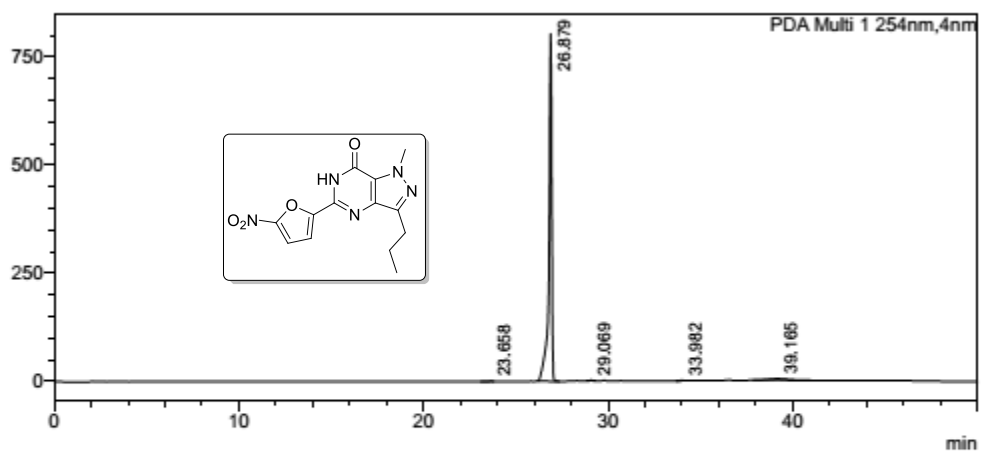

## <Peak Table>

PDA Ch1 254nm

| Peak# | Ret. Time | Area    | Height | Area%   | Height% |
|-------|-----------|---------|--------|---------|---------|
| 1     | 23.658    | 9756    | 861    | 0.109   | 0.106   |
| 2     | 26.879    | 8546397 | 802561 | 95.800  | 98.880  |
| 3     | 29.069    | 26648   | 3044   | 0.299   | 0.375   |
| 4     | 33.982    | 18249   | 1444   | 0.205   | 0.178   |
| 5     | 39.165    | 320040  | 3739   | 3.587   | 0.461   |
| Total |           | 8921091 | 811649 | 100.000 | 100.000 |

# Compound (10)

<sup>1</sup>H NMR in CDCl<sub>3</sub>

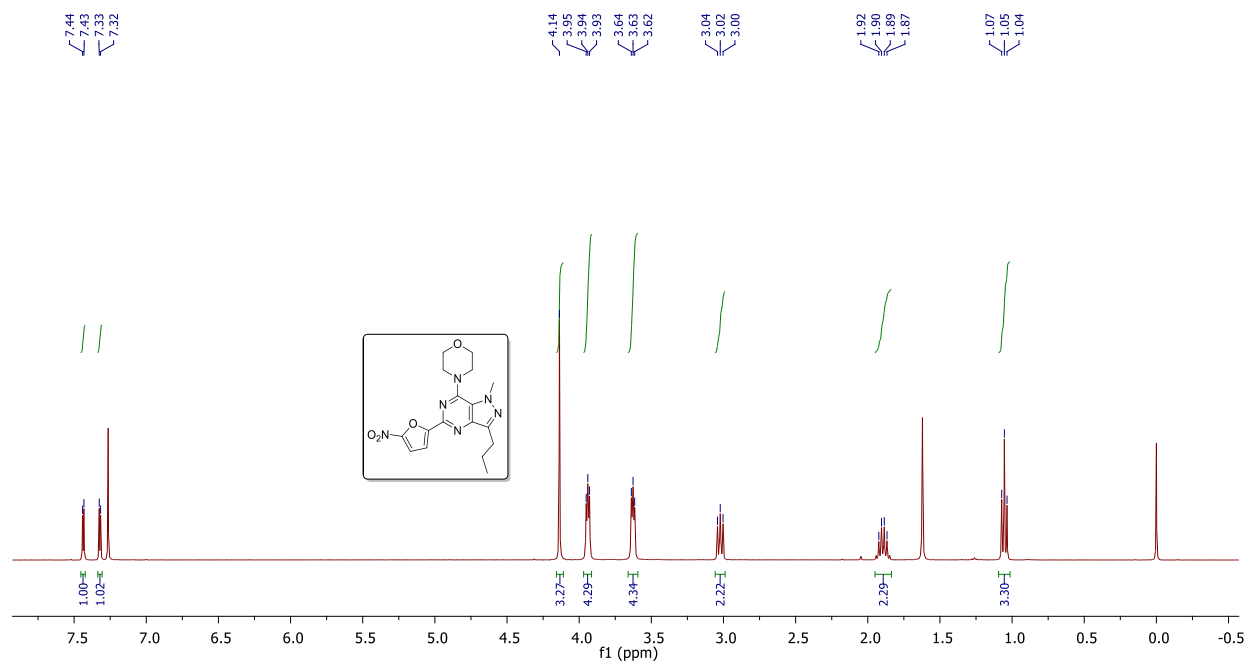

<sup>13</sup>C NMR in DMSO-d<sub>6</sub>

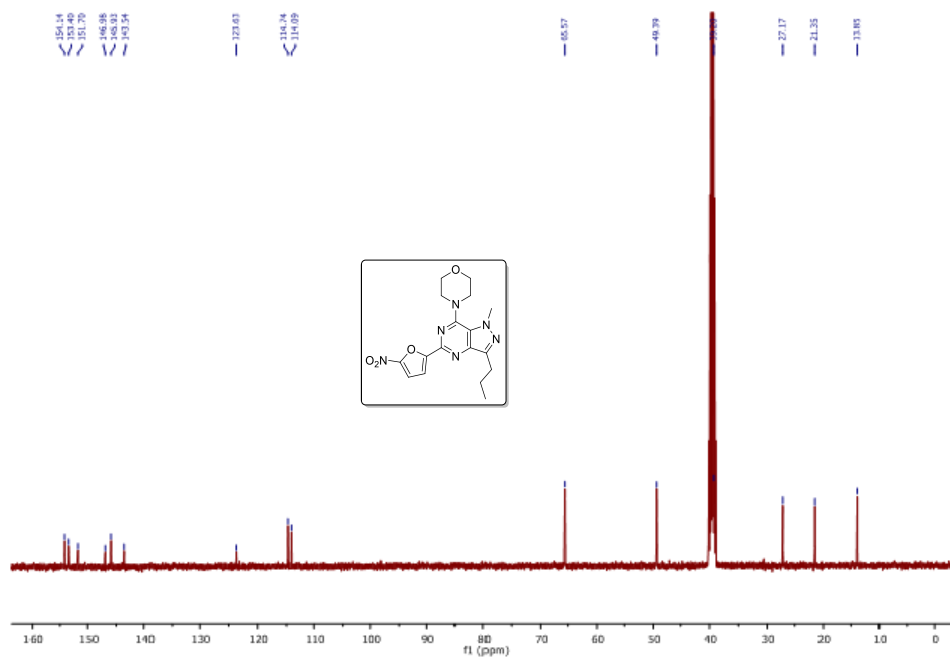

# HRMS

## Qualitative Compound Report

Data File: GLR-3.d  
Sample Type: Sample  
Instrument Name: Instrument 1  
Acq Method: vishal\_MS\_25072012.m  
IRM Calibration Status: Success  
Comment:  
Sample Name: GLR-3  
Position: Vial 15  
User Name:  
Acquired Time: 11/18/2012 1:01:38 PM  
DA Method: as.m

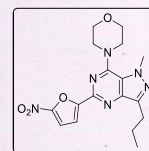

Sample Group Info.

### Compound Table

| Compound Label       | RT    | Mass      | Formula       | MFG Formula   | MFG Diff (ppm) | DB Formula    |
|----------------------|-------|-----------|---------------|---------------|----------------|---------------|
| Cpd 5: C17 H20 N6 O4 | 0.172 | 372.15417 | C17 H20 N6 O4 | C17 H20 N6 O4 | 1.15           | C17 H20 N6 O4 |

| Compound Label       | m/z       | RT    | Algorithm                 | Mass      |
|----------------------|-----------|-------|---------------------------|-----------|
| Cpd 5: C17 H20 N6 O4 | 373.16145 | 0.172 | Find by Molecular Feature | 372.15417 |

### MFE MS Spectrum

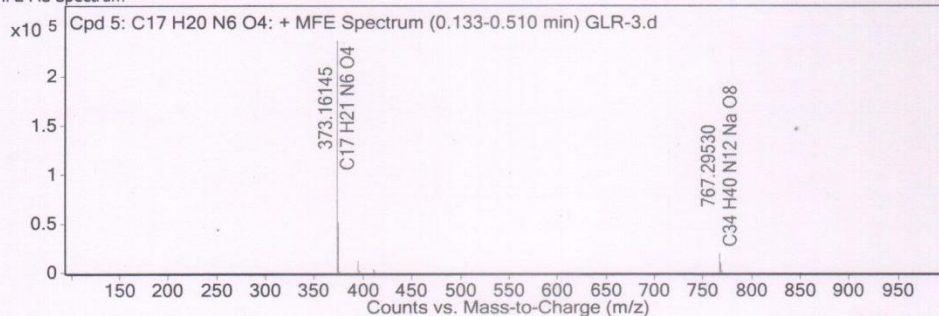

### MS Spectrum Peak List

| m/z       | z | Abund    | Formula           | Ion      |
|-----------|---|----------|-------------------|----------|
| 373.16145 | 1 | 235973.3 | C17 H21 N6 O4     | (M+H)+   |
| 374.16411 | 1 | 51344.5  | C17 H21 N6 O4     | (M+H)+   |
| 375.16622 | 1 | 6824.4   | C17 H21 N6 O4     | (M+H)+   |
| 376.1728  | 1 | 1272.5   | C17 H21 N6 O4     | (M+H)+   |
| 395.14219 | 1 | 11735.8  | C17 H20 N6 Na O4  | (M+Na)+  |
| 396.14658 | 1 | 2717.6   | C17 H20 N6 Na O4  | (M+Na)+  |
| 411.11631 | 1 | 3962.3   | C17 H20 K N6 O4   | (M+K)+   |
| 767.2953  | 1 | 19822    | C34 H40 N12 Na O8 | (2M+Na)+ |
| 768.2981  | 1 | 9457.8   | C34 H40 N12 Na O8 | (2M+Na)+ |
| 769.30404 | 1 | 2588.5   | C34 H40 N12 Na O8 | (2M+Na)+ |

### Predicted Isotope Match Table

| Isotope | m/z       | Calc m/z  | Diff (ppm) | Abund % | Calc Abund % | Abund Sum % | Calc Abund Sum % |
|---------|-----------|-----------|------------|---------|--------------|-------------|------------------|
| 1       | 373.16145 | 373.16188 | 1.15       | 100     | 100          | 79.88       | 80.52            |
| 2       | 374.16411 | 374.16461 | 1.35       | 21.76   | 20.97        | 17.38       | 16.89            |
| 3       | 375.16622 | 375.16698 | 2.02       | 2.89    | 2.92         | 2.31        | 2.35             |
| 4       | 376.1728  | 376.16934 | -9.19      | 0.54    | 0.3          | 0.43        | 0.25             |

--- End Of Report ---

# HPLC

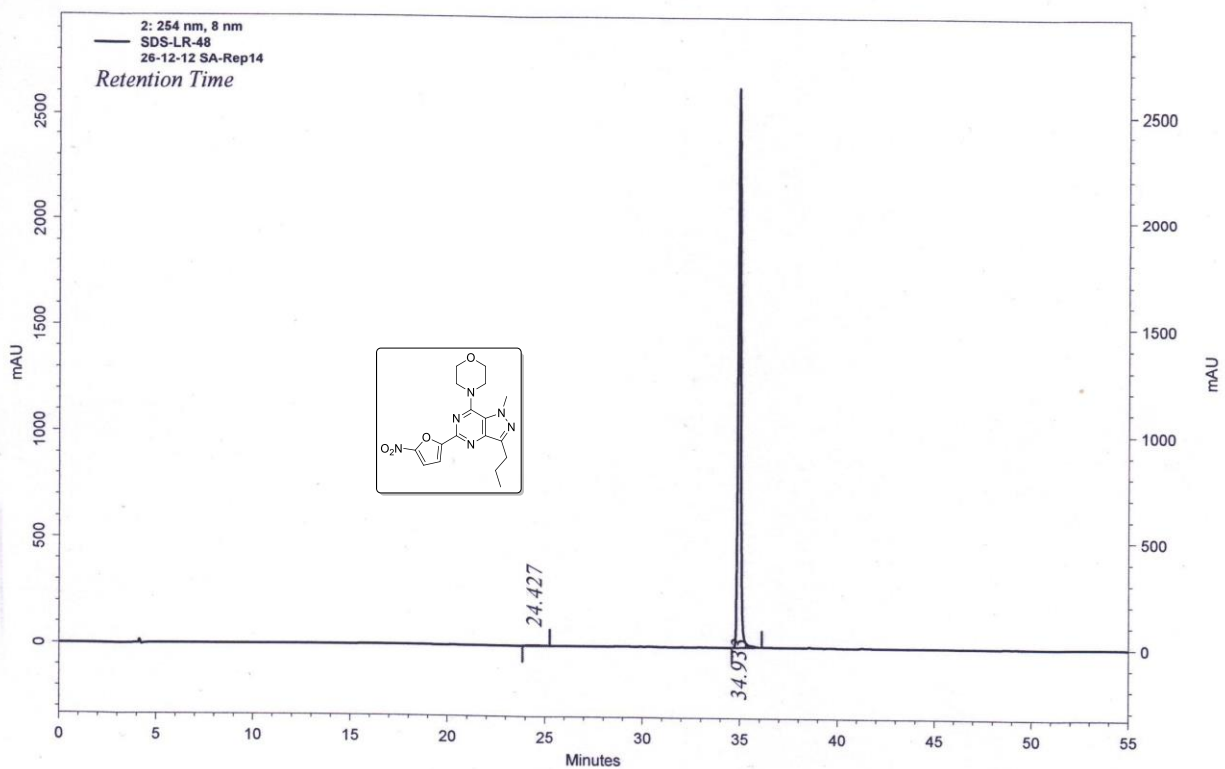

2: 254 nm, 8 nm

| Pk #   | Retention Time | Area     | Area %  | Height  | Height % |
|--------|----------------|----------|---------|---------|----------|
| 1      | 24.427         | 120621   | 0.473   | 2660    | 0.101    |
| 2      | 34.933         | 25386197 | 99.527  | 2629592 | 99.899   |
| Totals |                | 25506818 | 100.000 | 2632252 | 100.000  |

# Compound (11)

<sup>1</sup>H NMR in CDCl<sub>3</sub>

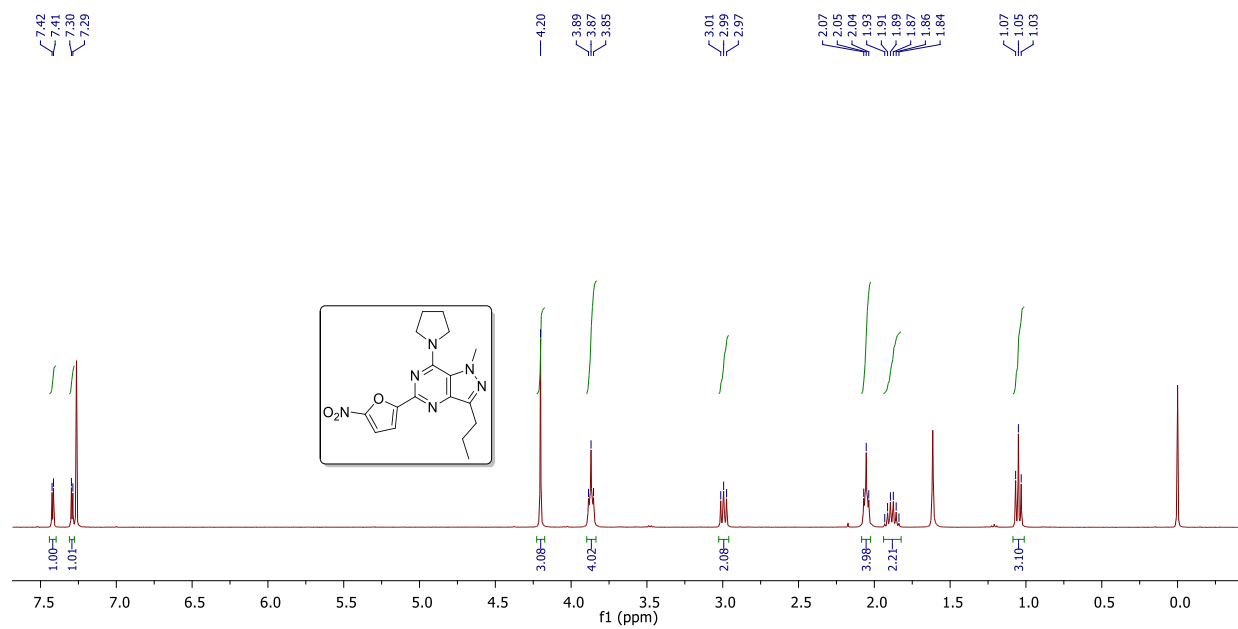

<sup>13</sup>C NMR in DMSO-d<sub>6</sub>

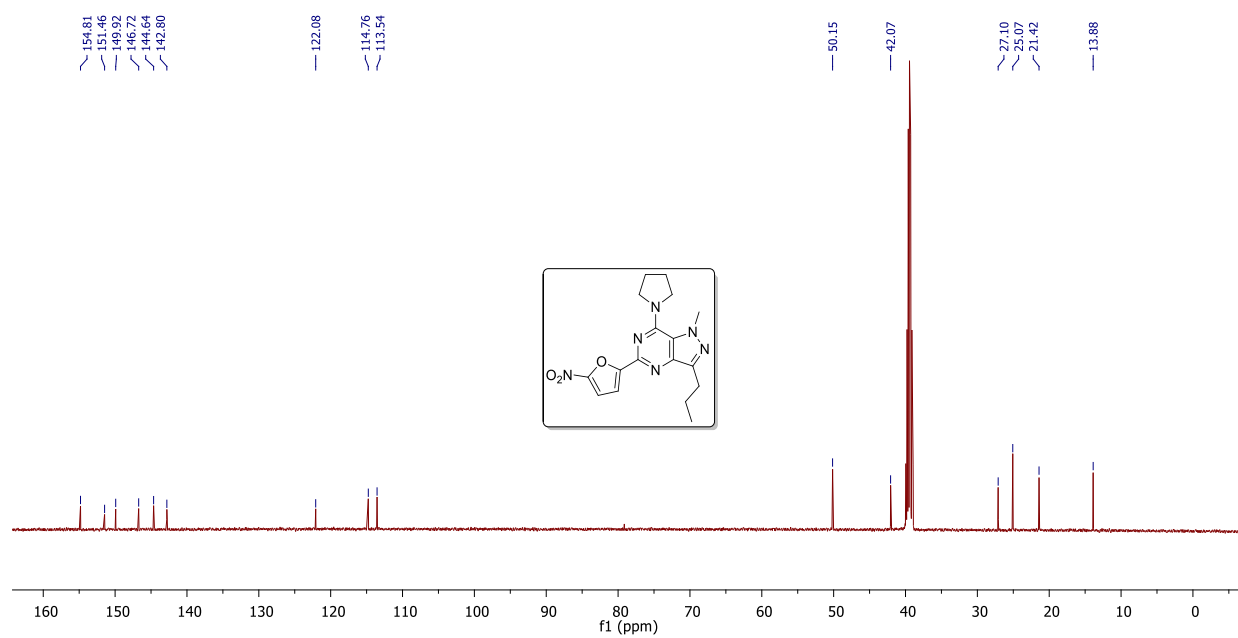

## Qualitative Compound Report

|                        |                      |               |                       |
|------------------------|----------------------|---------------|-----------------------|
| Data File              | GLR-4.d              | Sample Name   | GLR-4                 |
| Sample Type            | Sample               | Position      | Vial 16               |
| Instrument Name        | Instrument 1         | User Name     |                       |
| Acq Method             | vishal_MS_25072012.m | Acquired Time | 11/18/2012 1:05:08 PM |
| IRM Calibration Status | Success              | DA Method     | as.m                  |
| Comment                |                      |               |                       |

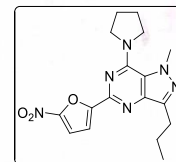

Sample Group Info.

Compound Table

| Compound Label       | RT    | Mass      | Formula       | MFG Formula   | MFG Diff (ppm) | DB Formula    |
|----------------------|-------|-----------|---------------|---------------|----------------|---------------|
| Cpd 5: C17 H20 N6 O3 | 0.172 | 356.15946 | C17 H20 N6 O3 | C17 H20 N6 O3 | 0.65           | C17 H20 N6 O3 |

| Compound Label       | m/z       | RT    | Algorithm                 | Mass      |
|----------------------|-----------|-------|---------------------------|-----------|
| Cpd 5: C17 H20 N6 O3 | 357.16674 | 0.172 | Find by Molecular Feature | 356.15946 |

MFE MS Spectrum

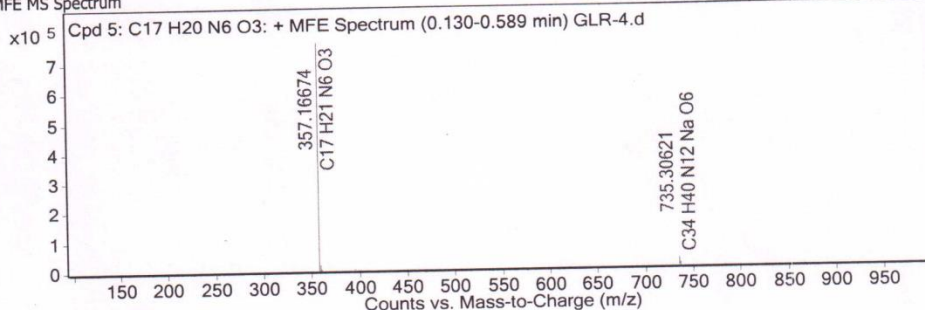

MS Spectrum Peak List

| m/z       | z | Abund    | Formula           | Ion      |
|-----------|---|----------|-------------------|----------|
| 357.16674 | 1 | 768028.4 | C17 H21 N6 O3     | (M+H)+   |
| 358.16916 | 1 | 139494   | C17 H21 N6 O3     | (M+H)+   |
| 359.17205 | 1 | 19945    | C17 H21 N6 O3     | (M+H)+   |
| 360.174   | 1 | 2781.2   | C17 H21 N6 O3     | (M+H)+   |
| 395.12085 | 1 | 3667.1   | C17 H20 K N6 O3   | (M+K)+   |
| 713.32567 | 1 | 1339.9   | C34 H41 N12 O6    | (2M+H)+  |
| 735.30621 | 1 | 25984.2  | C34 H40 N12 Na O6 | (2M+Na)+ |
| 736.30976 | 1 | 10434.4  | C34 H40 N12 Na O6 | (2M+Na)+ |
| 737.31306 | 1 | 2889.4   | C34 H40 N12 Na O6 | (2M+Na)+ |
| 751.27874 | 1 | 1425.7   |                   | (2M+K)+  |

Predicted Isotope Match Table

| Isotope | m/z       | Calc m/z  | Diff (ppm) | Abund % | Calc Abund % | Abund Sum % | Calc Abund Sum % |
|---------|-----------|-----------|------------|---------|--------------|-------------|------------------|
| 1       | 357.16674 | 357.16697 | 0.64       | 100     | 100          | 82.56       | 80.71            |
| 2       | 358.16916 | 358.1697  | 1.51       | 18.16   | 20.93        | 15          | 16.9             |
| 3       | 359.17205 | 359.17212 | 0.19       | 2.6     | 2.7          | 2.14        | 2.18             |
| 4       | 360.174   | 360.1745  | 1.39       | 0.36    | 0.26         | 0.3         | 0.21             |

--- End Of Report ---



## HPLC

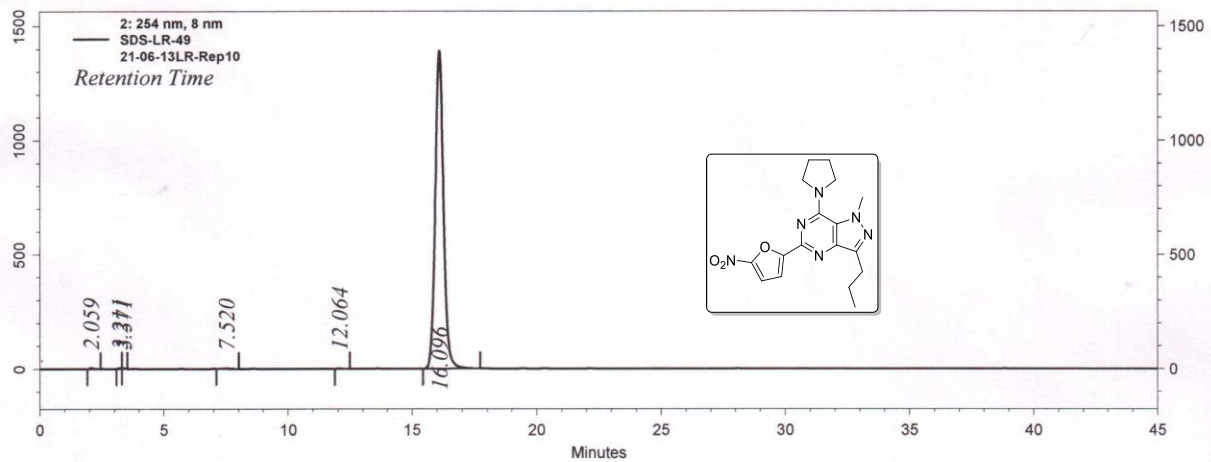

2: 254 nm, 8 nm

| Pk #   | Retention Time | Area     | Area %  | Height  | Height % |
|--------|----------------|----------|---------|---------|----------|
| 1      | 2.059          | 50179    | 0.156   | 4345    | 0.310    |
| 2      | 3.211          | 11643    | 0.036   | 1731    | 0.124    |
| 3      | 3.371          | 11268    | 0.035   | 1868    | 0.133    |
| 4      | 7.520          | 42194    | 0.131   | 1902    | 0.136    |
| 5      | 12.064         | 11216    | 0.035   | 729     | 0.052    |
| 6      | 16.096         | 32033014 | 99.607  | 1390578 | 99.245   |
| Totals |                | 32159514 | 100.000 | 1401153 | 100.000  |

## Compound (12)

$^1\text{H}$  NMR in  $\text{CDCl}_3$

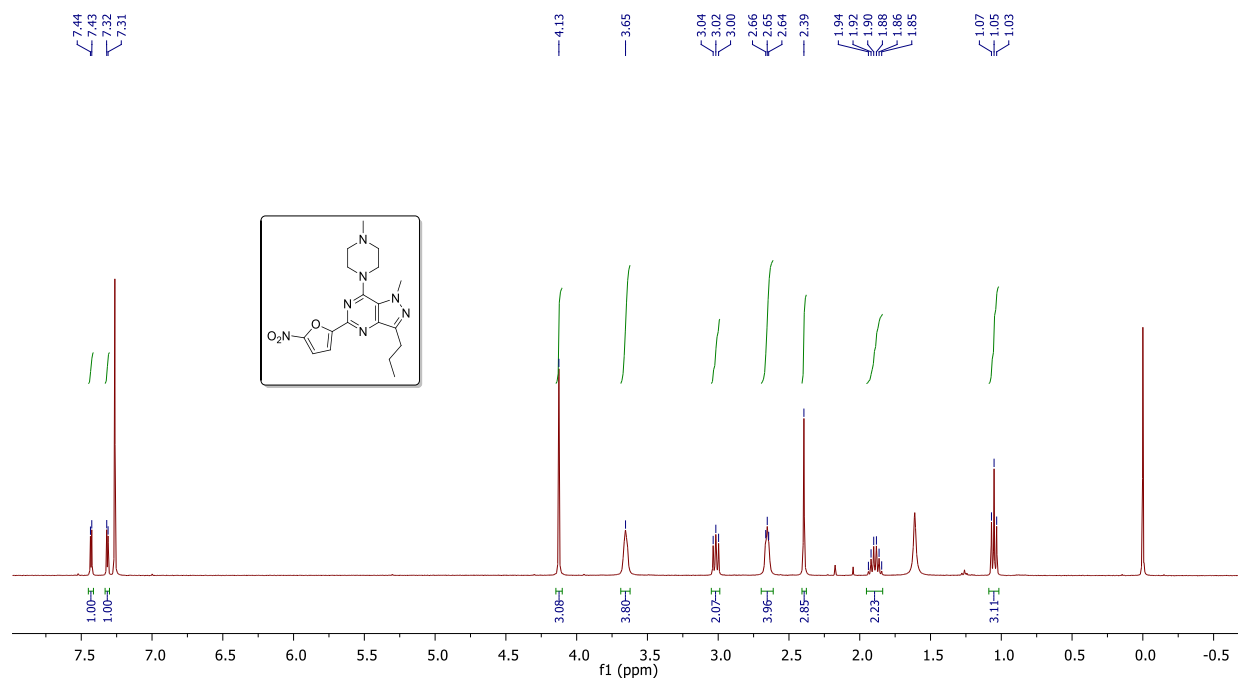

$^{13}\text{C}$  NMR in  $\text{CDCl}_3$

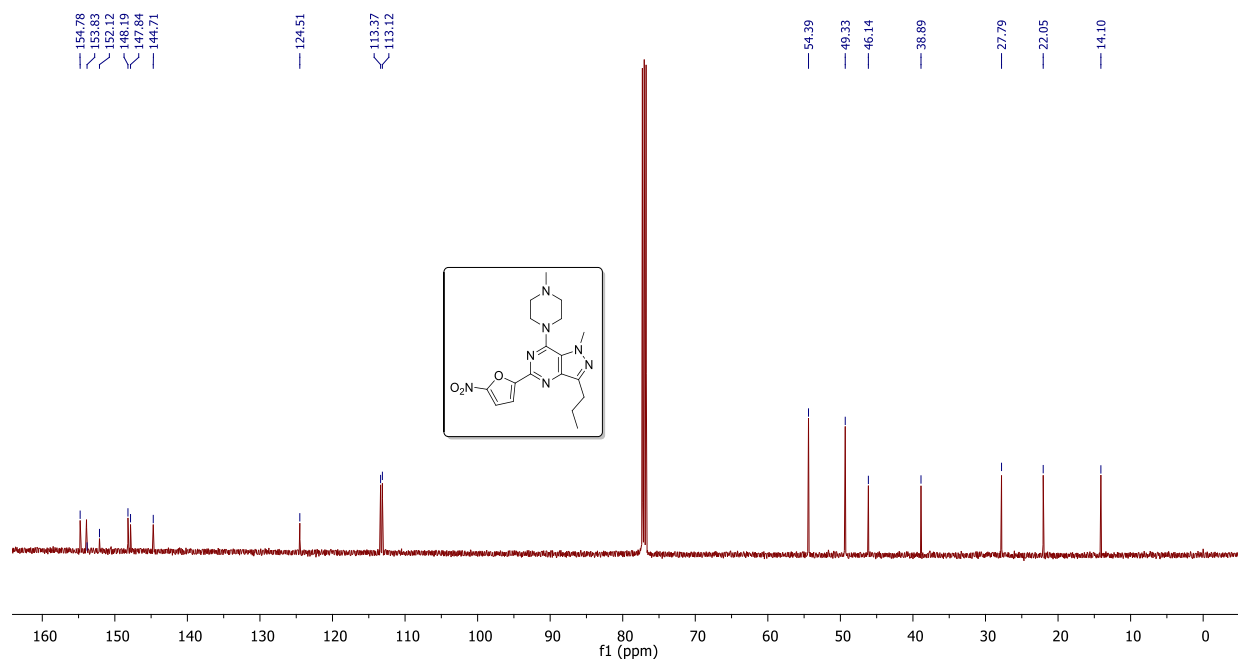



# HRMS

## Qualitative Compound Report

Data File: GLR-5.d  
Sample Type: Sample  
Instrument Name: Instrument 1  
Acq Method: vishal\_MS\_25072012.m  
IRM Calibration Status: Success  
Comment:

Sample Name: GLR-5  
Position: Vial 17  
User Name:  
Acquired Time: 11/18/2012 1:12:21 PM  
DA Method: as.m

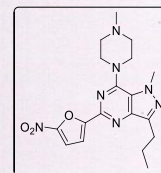

Sample Group Info.

### Compound Table

| Compound Label       | RT    | Mass      | Formula       | MFG Formula   | MFG Diff (ppm) | DB Formula    |
|----------------------|-------|-----------|---------------|---------------|----------------|---------------|
| Cpd 4: C18 H23 N7 O3 | 0.173 | 385.18543 | C18 H23 N7 O3 | C18 H23 N7 O3 | 2.1            | C18 H23 N7 O3 |

| Compound Label       | m/z      | RT    | Algorithm                 | Mass      |
|----------------------|----------|-------|---------------------------|-----------|
| Cpd 4: C18 H23 N7 O3 | 386.1927 | 0.173 | Find by Molecular Feature | 385.18543 |

### MFE MS Spectrum

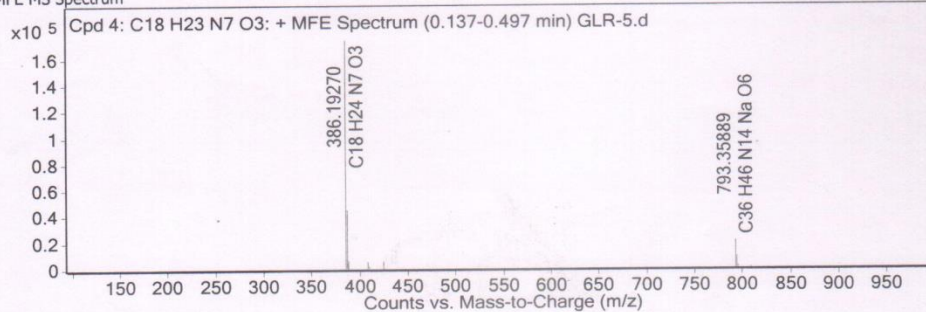

### MS Spectrum Peak List

| m/z       | z | Abund    | Formula           | Ion      |
|-----------|---|----------|-------------------|----------|
| 386.1927  | 1 | 174231.3 | C18 H24 N7 O3     | (M+H)+   |
| 387.19537 | 1 | 44957.3  | C18 H24 N7 O3     | (M+H)+   |
| 388.19784 | 1 | 6231.9   | C18 H24 N7 O3     | (M+H)+   |
| 408.17537 | 1 | 5719.9   | C18 H23 N7 Na O3  | (M+Na)+  |
| 409.17608 | 1 | 1923.6   | C18 H23 N7 Na O3  | (M+Na)+  |
| 424.14983 | 1 | 5337     | C18 H23 K N7 O3   | (M+K)+   |
| 793.35889 | 1 | 20263.4  | C36 H46 N14 Na O6 | (2M+Na)+ |
| 794.36056 | 1 | 8667.9   | C36 H46 N14 Na O6 | (2M+Na)+ |
| 795.36628 | 1 | 1957.3   | C36 H46 N14 Na O6 | (2M+Na)+ |
| 809.32941 | 1 | 1257.5   |                   | (2M+K)+  |

### Predicted Isotope Match Table

| Isotope | m/z       | Calc m/z  | Diff (ppm) | Abund % | Calc Abund % | Abund Sum % | Calc Abund Sum % |
|---------|-----------|-----------|------------|---------|--------------|-------------|------------------|
| 1       | 386.1927  | 386.19351 | 2.1        | 100     | 100          | 77.29       | 79.72            |
| 2       | 387.19537 | 387.19619 | 2.11       | 25.8    | 22.42        | 19.94       | 17.87            |
| 3       | 388.19784 | 388.19861 | 1.99       | 3.58    | 3.02         | 2.76        | 2.41             |

--- End Of Report ---

# HPLC

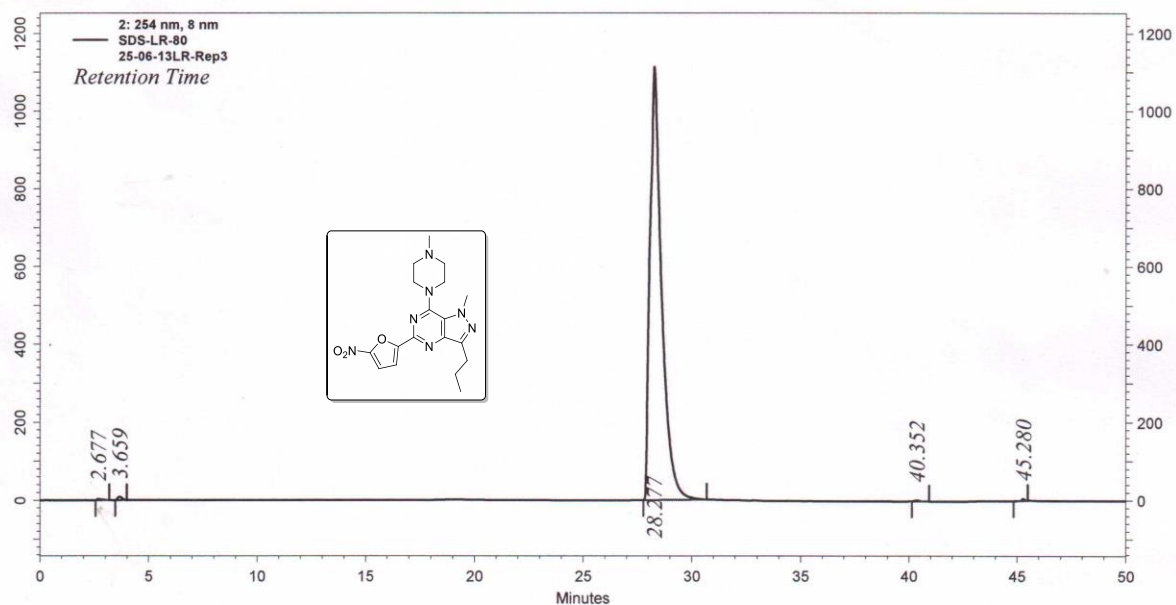

2: 254 nm, 8 nm

| Pk # | Retention Time | Area     | Area % | Height  | Height % |
|------|----------------|----------|--------|---------|----------|
| 1    | 2.677          | 50847    | 0.122  | 3231    | 0.285    |
| 2    | 3.659          | 120638   | 0.291  | 8897    | 0.786    |
| 3    | 28.277         | 41262011 | 99.386 | 1112491 | 98.255   |
| 4    | 40.352         | 42597    | 0.103  | 2730    | 0.241    |
| 5    | 45.280         | 40967    | 0.099  | 4901    | 0.433    |

|        |  |          |         |         |         |
|--------|--|----------|---------|---------|---------|
| Totals |  | 41517060 | 100.000 | 1132250 | 100.000 |
|--------|--|----------|---------|---------|---------|

# Compound (13)

$^1\text{H}$  NMR in  $\text{CDCl}_3$

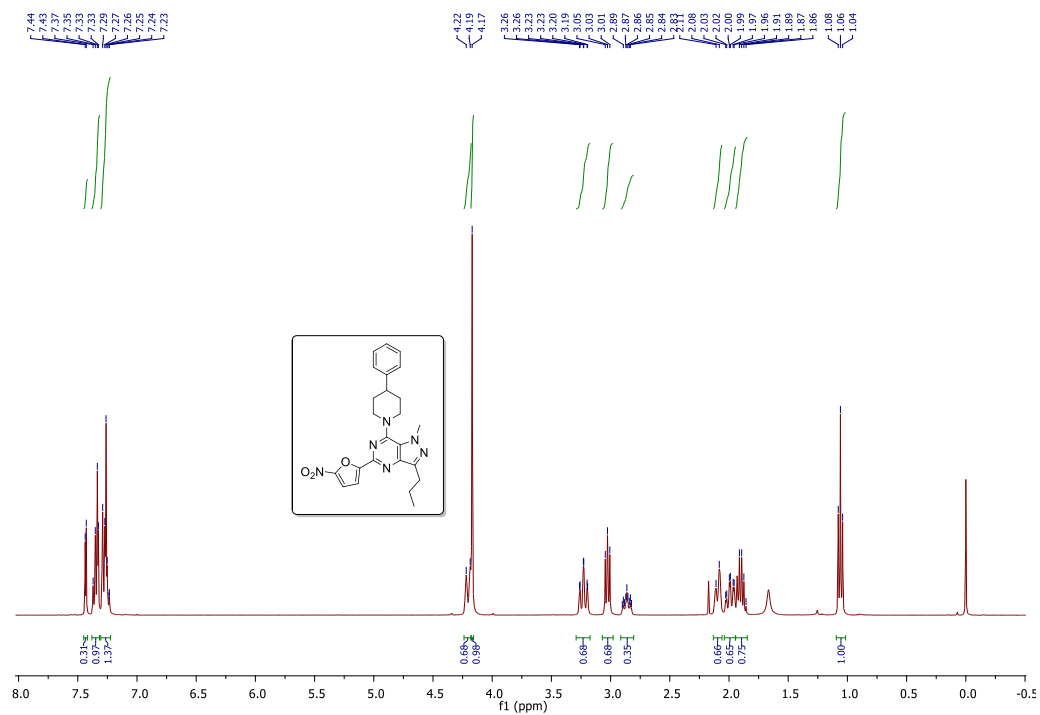

$^{13}\text{C}$  NMR in  $\text{CDCl}_3$

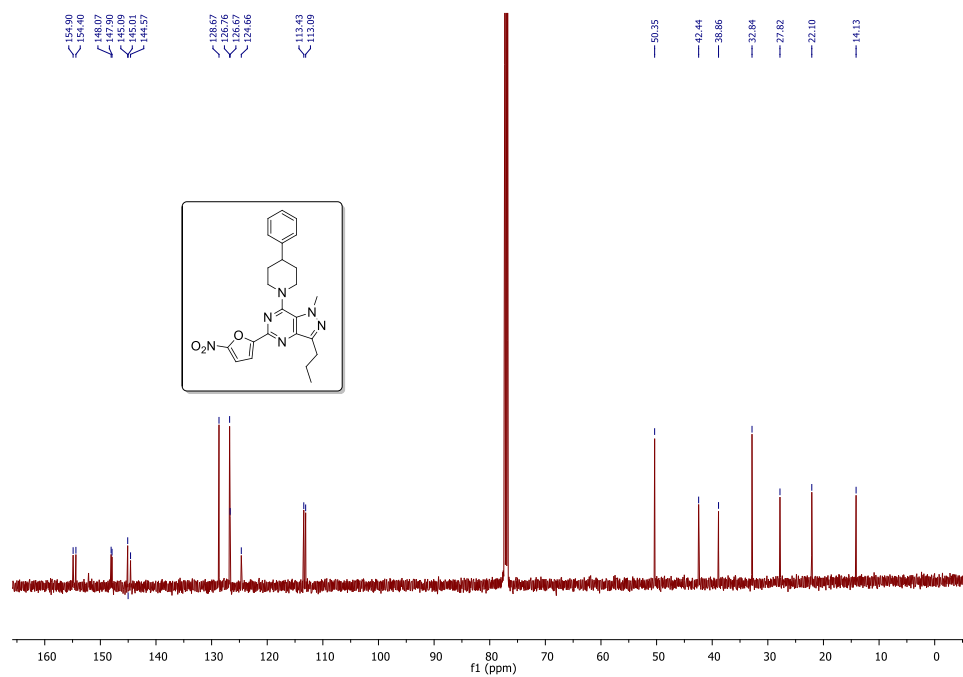

# HRMS

## Qualitative Compound Report

Data File: GLR-7.d  
Sample Type: Sample  
Instrument Name: Instrument 1  
Acq Method: vishal\_MS\_25072012.m  
IRM Calibration Status: Success  
Comment:  
Sample Name: GLR-7  
Position: Vial 19  
User Name:  
Acquired Time: 11/18/2012 1:19:31 PM  
DA Method: as.m

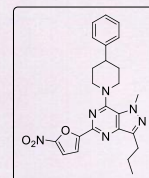

Sample Group Info.

### Compound Table

| Compound Label        | RT    | Mass      | Formula       | MFG Formula   | MFG Diff (ppm) | DB Formula    |
|-----------------------|-------|-----------|---------------|---------------|----------------|---------------|
| Cpd 12: C24 H26 N6 O3 | 0.172 | 446.20674 | C24 H26 N6 O3 | C24 H26 N6 O3 | -0.24          | C24 H26 N6 O3 |

| Compound Label        | m/z       | RT    | Algorithm                 | Mass      |
|-----------------------|-----------|-------|---------------------------|-----------|
| Cpd 12: C24 H26 N6 O3 | 447.21403 | 0.172 | Find by Molecular Feature | 446.20674 |

### MFE MS Spectrum

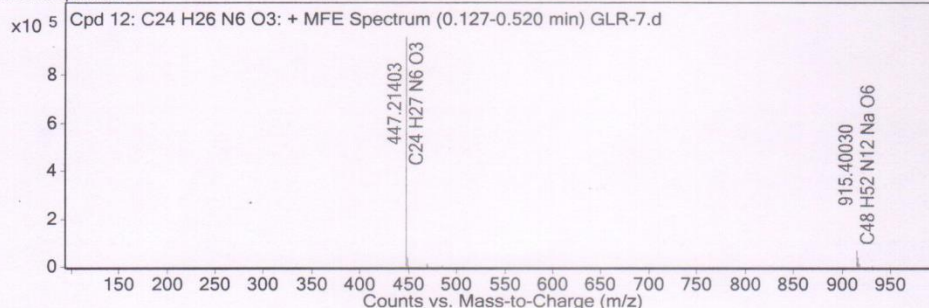

### MS Spectrum Peak List

| m/z       | z | Abund    | Formula           | Ion      |
|-----------|---|----------|-------------------|----------|
| 447.21403 | 1 | 958164.8 | C24 H27 N6 O3     | (M+H)+   |
| 448.21645 | 1 | 237876.4 | C24 H27 N6 O3     | (M+H)+   |
| 449.21835 | 1 | 41806.9  | C24 H27 N6 O3     | (M+H)+   |
| 450.22169 | 1 | 4009.4   | C24 H27 N6 O3     | (M+H)+   |
| 469.19481 | 1 | 14297.8  | C24 H26 N6 Na O3  | (M+Na)+  |
| 470.19727 | 1 | 5903.1   | C24 H26 N6 Na O3  | (M+Na)+  |
| 485.16837 | 1 | 6056.8   | C24 H26 K N6 O3   | (M+K)+   |
| 915.4003  | 1 | 67070.6  | C48 H52 N12 Na O6 | (2M+Na)+ |
| 916.40256 | 1 | 41161.3  | C48 H52 N12 Na O6 | (2M+Na)+ |
| 917.40665 | 1 | 13327.1  | C48 H52 N12 Na O6 | (2M+Na)+ |

### Predicted Isotope Match Table

| Isotope | m/z       | Calc m/z  | Diff (ppm) | Abund % | Calc Abund % | Abund Sum % | Calc Abund Sum % |
|---------|-----------|-----------|------------|---------|--------------|-------------|------------------|
| 1       | 447.21403 | 447.21392 | -0.25      | 100     | 100          | 77.1        | 74.79            |
| 2       | 448.21645 | 448.21682 | 0.84       | 24.83   | 28.57        | 19.14       | 21.37            |
| 3       | 449.21835 | 449.2195  | 2.54       | 4.36    | 4.55         | 3.36        | 3.41             |
| 4       | 450.22169 | 450.22206 | 0.82       | 0.42    | 0.52         | 0.32        | 0.39             |
| 5       | 451.2252  | 451.22459 | -1.34      | 0.1     | 0.05         | 0.08        | 0.04             |

--- End Of Report ---



# HPLC

## <Chromatogram>

mAU

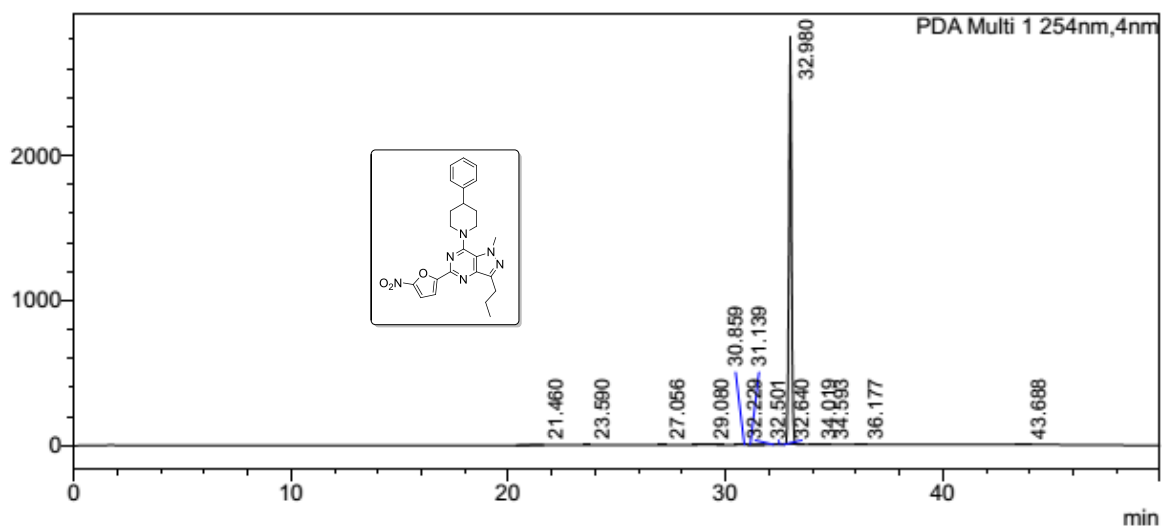

## <Peak Table>

PDA Ch1 254nm

| Peak# | Name | Ret. Time | Area     | Height  | Area%   | Height% |
|-------|------|-----------|----------|---------|---------|---------|
| 1     |      | 21.460    | 17120    | 354     | 0.074   | 0.013   |
| 2     |      | 23.590    | 3788     | 356     | 0.016   | 0.013   |
| 3     |      | 27.056    | 2177     | 175     | 0.009   | 0.006   |
| 4     |      | 29.080    | 71506    | 2350    | 0.309   | 0.083   |
| 5     |      | 30.859    | 20834    | 979     | 0.090   | 0.035   |
| 6     |      | 31.139    | 22589    | 1010    | 0.098   | 0.036   |
| 7     |      | 32.229    | 6462     | 617     | 0.028   | 0.022   |
| 8     |      | 32.501    | 4944     | 475     | 0.021   | 0.017   |
| 9     |      | 32.640    | 3442     | 512     | 0.015   | 0.018   |
| 10    |      | 32.980    | 22927758 | 2815679 | 99.193  | 99.653  |
| 11    |      | 34.019    | 9337     | 1056    | 0.040   | 0.037   |
| 12    |      | 34.593    | 7748     | 740     | 0.034   | 0.026   |
| 13    |      | 36.177    | 8091     | 781     | 0.035   | 0.028   |
| 14    |      | 43.688    | 8557     | 397     | 0.037   | 0.014   |
| Total |      |           | 23114352 | 2825481 | 100.000 | 100.000 |

# Compound (14)

<sup>1</sup>H NMR in CDCl<sub>3</sub>

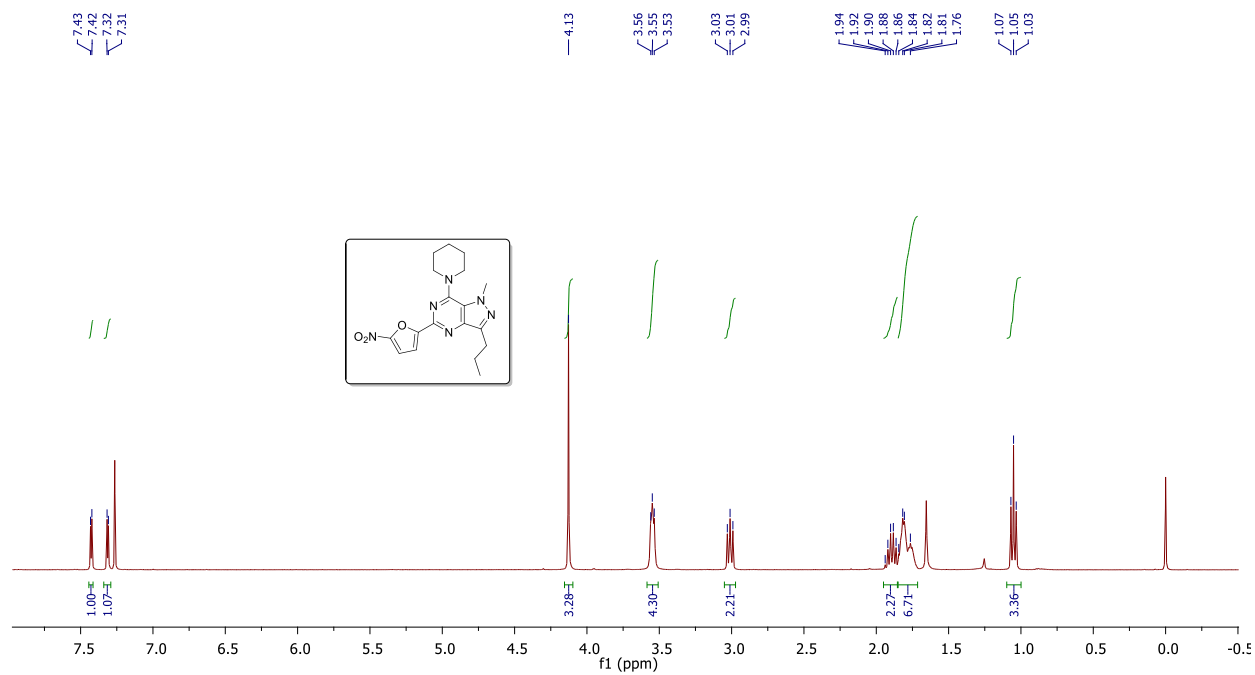

<sup>13</sup>C NMR in DMSO-d<sub>6</sub>

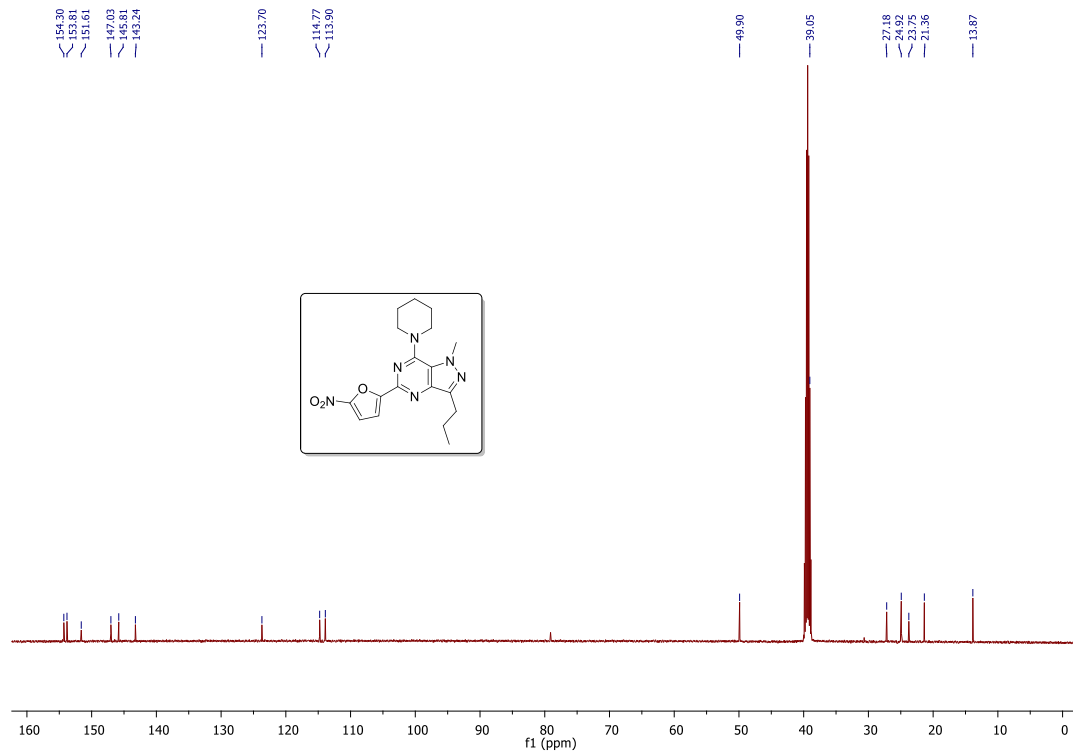

# Qualitative Compound Report

**Data File** GLR-9.d  
**Sample Type** Sample  
**Instrument Name** Instrument 1  
**Acq Method** vishal\_MS\_25072012.m  
**IRM Calibration Status** Success  
**Comment**  
**Sample Name** GLR-9  
**Position** Vial 21  
**User Name**  
**Acquired Time** 11/18/2012 1:30:20 PM  
**DA Method** as.m

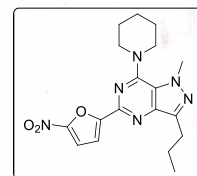

**Sample Group** Info.

## Compound Table

| Compound Label       | RT    | Mass      | Formula       | MFG Formula   | MFG Diff (ppm) | DB Formula    |
|----------------------|-------|-----------|---------------|---------------|----------------|---------------|
| Cpd 7: C18 H22 N6 O3 | 0.171 | 370.17588 | C18 H22 N6 O3 | C18 H22 N6 O3 | -1.47          | C18 H22 N6 O3 |

| Compound Label       | m/z       | RT    | Algorithm                 | Mass      |
|----------------------|-----------|-------|---------------------------|-----------|
| Cpd 7: C18 H22 N6 O3 | 371.18316 | 0.171 | Find by Molecular Feature | 370.17588 |

## MFE MS Spectrum

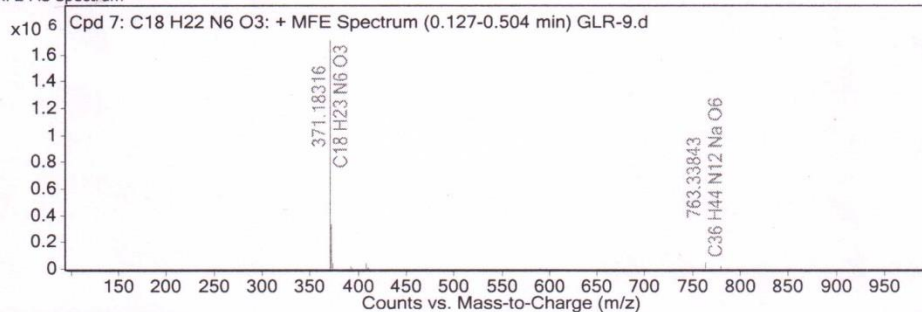

## MS Spectrum Peak List

| m/z       | z | Abund     | Formula           | Ion      |
|-----------|---|-----------|-------------------|----------|
| 371.18316 | 1 | 1710306.3 | C18 H23 N6 O3     | (M+H)+   |
| 372.18545 | 1 | 338550.6  | C18 H23 N6 O3     | (M+H)+   |
| 373.1876  | 1 | 45875.7   | C18 H23 N6 O3     | (M+H)+   |
| 393.16348 | 1 | 19248.2   | C18 H22 N6 Na O3  | (M+Na)+  |
| 409.13775 | 1 | 42069.2   | C18 H22 K N6 O3   | (M+K)+   |
| 410.14165 | 1 | 11466.2   | C18 H22 K N6 O3   | (M+K)+   |
| 763.33843 | 1 | 40797.3   | C36 H44 N12 Na O6 | (2M+Na)+ |
| 764.34183 | 1 | 17335.7   | C36 H44 N12 Na O6 | (2M+Na)+ |
| 779.31155 | 1 | 19374.3   | C36 H44 K N12 O6  | (2M+K)+  |
| 780.31742 | 1 | 7708.8    | C36 H44 K N12 O6  | (2M+K)+  |

## Predicted Isotope Match Table

| Isotope | m/z       | Calc m/z  | Diff (ppm) | Abund % | Calc Abund % | Abund Sum % | Calc Abund Sum % |
|---------|-----------|-----------|------------|---------|--------------|-------------|------------------|
| 1       | 371.18316 | 371.18262 | -1.48      | 100     | 100          | 81.43       | 79.83            |
| 2       | 372.18545 | 372.18538 | -0.18      | 19.79   | 22.04        | 16.12       | 17.59            |
| 3       | 373.1876  | 373.18785 | 0.66       | 2.68    | 2.94         | 2.18        | 2.34             |
| 4       | 374.18971 | 374.19026 | 1.45       | 0.32    | 0.29         | 0.26        | 0.23             |

--- End Of Report ---

# HPLC

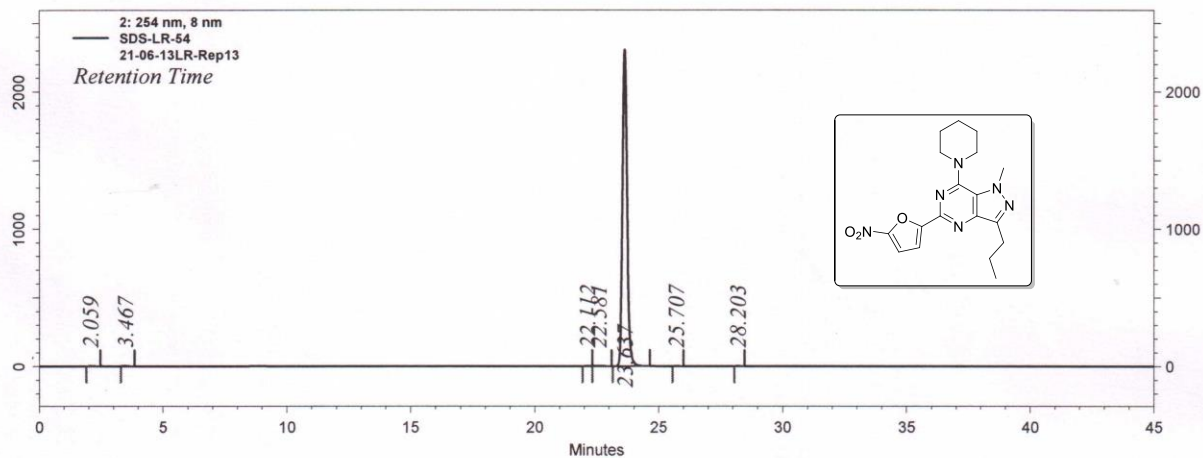

2: 254 nm, 8 nm

| Pk # | Retention Time | Area     | Area % | Height  | Height % |
|------|----------------|----------|--------|---------|----------|
| 1    | 2.059          | 32755    | 0.110  | 2637    | 0.114    |
| 2    | 3.467          | 35884    | 0.120  | 2626    | 0.113    |
| 3    | 22.112         | 18641    | 0.063  | 1584    | 0.068    |
| 4    | 22.581         | 36161    | 0.121  | 1764    | 0.076    |
| 5    | 23.637         | 29674419 | 99.500 | 2306441 | 99.523   |
| 6    | 25.707         | 13912    | 0.047  | 1267    | 0.055    |
| 7    | 28.203         | 11652    | 0.039  | 1184    | 0.051    |

|        |  |          |         |         |         |
|--------|--|----------|---------|---------|---------|
| Totals |  | 29823424 | 100.000 | 2317503 | 100.000 |
|--------|--|----------|---------|---------|---------|



# Compound (15)

<sup>1</sup>H NMR in CDCl<sub>3</sub>

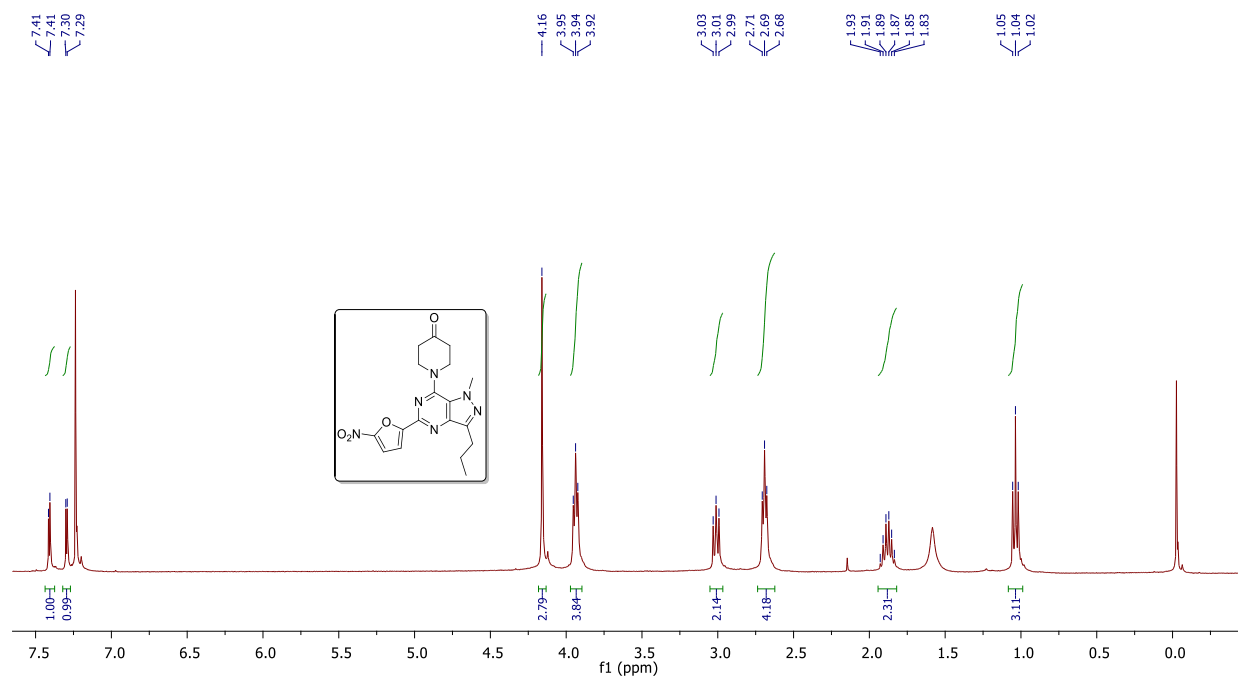

<sup>13</sup>C NMR in DMSO-d<sub>6</sub>

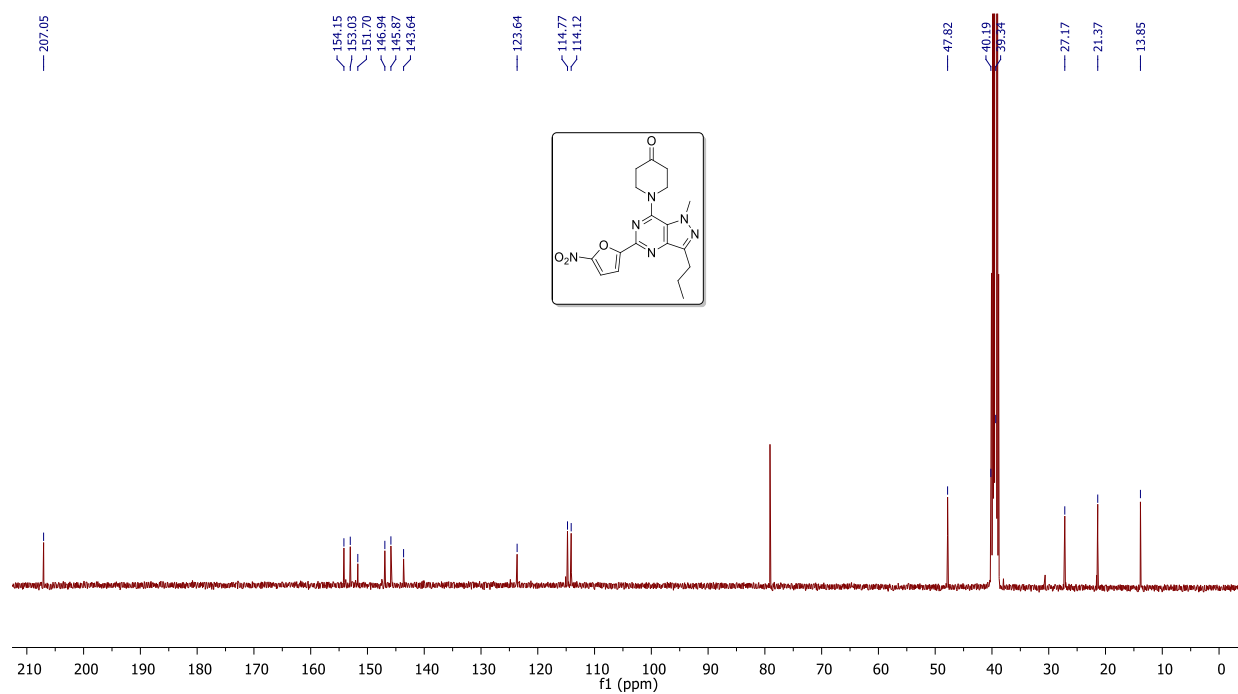

## HRMS

## Qualitative Compound Report

**Data File** GLR-4-14.d  
**Sample Type** Sample  
**Instrument Name** Instrument 1  
**Acq Method** vishal\_MS\_25072012.m  
**IRM Calibration Status** Success  
**Comment**  
**Sample Name** GLR-4-14  
**Position** Vial 13  
**User Name**  
**Acquired Time** 11/19/2012 1:19:16 PM  
**DA Method** as.m

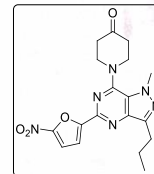

**Sample Group** Info.

## Compound Table

| Compound Label                                                       | RT    | Mass      | Formula                                                       | MFG Formula                                                   | MFG Diff (ppm) | DB Formula                                                    |
|----------------------------------------------------------------------|-------|-----------|---------------------------------------------------------------|---------------------------------------------------------------|----------------|---------------------------------------------------------------|
| Cpd 3: C <sub>18</sub> H <sub>20</sub> N <sub>6</sub> O <sub>4</sub> | 0.172 | 384.15373 | C <sub>18</sub> H <sub>20</sub> N <sub>6</sub> O <sub>4</sub> | C <sub>18</sub> H <sub>20</sub> N <sub>6</sub> O <sub>4</sub> | 2.28           | C <sub>18</sub> H <sub>20</sub> N <sub>6</sub> O <sub>4</sub> |

| Compound Label                                                       | m/z     | RT    | Algorithm                 | Mass      |
|----------------------------------------------------------------------|---------|-------|---------------------------|-----------|
| Cpd 3: C <sub>18</sub> H <sub>20</sub> N <sub>6</sub> O <sub>4</sub> | 385.161 | 0.172 | Find by Molecular Feature | 384.15373 |

## MFE MS Spectrum

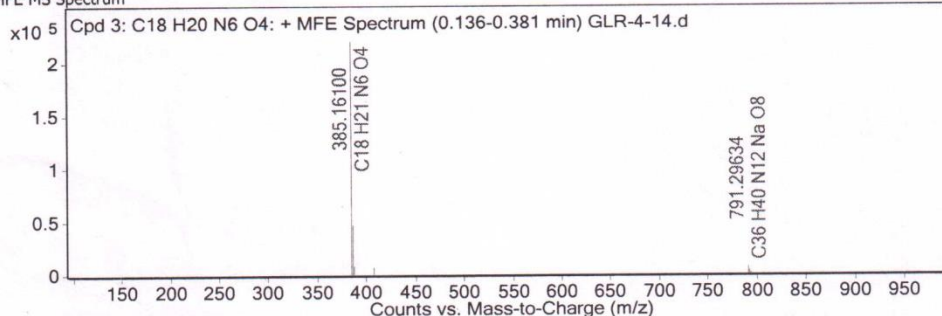

## MS Spectrum Peak List

| m/z       | z | Abund    | Formula                                                          | Ion                  |
|-----------|---|----------|------------------------------------------------------------------|----------------------|
| 385.161   | 1 | 219860.1 | C <sub>18</sub> H <sub>21</sub> N <sub>6</sub> O <sub>4</sub>    | (M+H) <sup>+</sup>   |
| 386.16381 | 1 | 46843.7  | C <sub>18</sub> H <sub>21</sub> N <sub>6</sub> O <sub>4</sub>    | (M+H) <sup>+</sup>   |
| 387.16582 | 1 | 7415.2   | C <sub>18</sub> H <sub>21</sub> N <sub>6</sub> O <sub>4</sub>    | (M+H) <sup>+</sup>   |
| 388.16683 | 1 | 926.5    | C <sub>18</sub> H <sub>21</sub> N <sub>6</sub> O <sub>4</sub>    | (M+H) <sup>+</sup>   |
| 407.14279 | 1 | 7253.8   | C <sub>18</sub> H <sub>20</sub> N <sub>6</sub> NaO <sub>4</sub>  | (M+Na) <sup>+</sup>  |
| 408.14394 | 1 | 1536.1   | C <sub>18</sub> H <sub>20</sub> N <sub>6</sub> NaO <sub>4</sub>  | (M+Na) <sup>+</sup>  |
| 791.29634 | 1 | 6643.8   | C <sub>36</sub> H <sub>40</sub> N <sub>12</sub> NaO <sub>8</sub> | (2M+Na) <sup>+</sup> |
| 792.29832 | 1 | 3234.9   | C <sub>36</sub> H <sub>40</sub> N <sub>12</sub> NaO <sub>8</sub> | (2M+Na) <sup>+</sup> |
| 793.29771 | 1 | 761.9    | C <sub>36</sub> H <sub>40</sub> N <sub>12</sub> NaO <sub>8</sub> | (2M+Na) <sup>+</sup> |

## Predicted Isotope Match Table

| Isotope | m/z       | Calc m/z  | Diff (ppm) | Abund % | Calc Abund % | Abund Sum % | Calc Abund Sum % |
|---------|-----------|-----------|------------|---------|--------------|-------------|------------------|
| 1       | 385.161   | 385.16188 | 2.27       | 100     | 100          | 79.94       | 79.66            |
| 2       | 386.16381 | 386.16464 | 2.17       | 21.31   | 22.05        | 17.03       | 17.57            |
| 3       | 387.16582 | 387.16705 | 3.18       | 3.37    | 3.14         | 2.7         | 2.5              |
| 4       | 388.16683 | 388.16943 | 6.71       | 0.42    | 0.34         | 0.34        | 0.27             |

End of Report

# HPLC

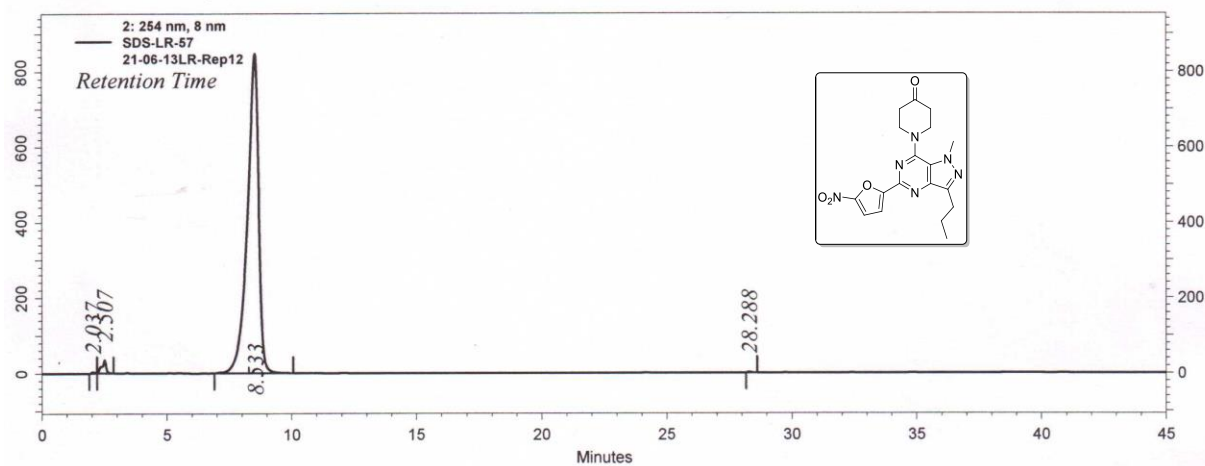

2: 254 nm, 8 nm

| Pk # | Retention Time | Area     | Area % | Height | Height % |
|------|----------------|----------|--------|--------|----------|
| 1    | 2.037          | 25240    | 0.094  | 3142   | 0.354    |
| 2    | 2.507          | 411832   | 1.536  | 34736  | 3.917    |
| 3    | 8.533          | 26360654 | 98.315 | 847257 | 95.540   |
| 4    | 28.288         | 14583    | 0.054  | 1671   | 0.188    |

|        |  |          |         |        |         |
|--------|--|----------|---------|--------|---------|
| Totals |  | 26812309 | 100.000 | 886806 | 100.000 |
|--------|--|----------|---------|--------|---------|

# Compound (16)

<sup>1</sup>H NMR in CDCl<sub>3</sub>

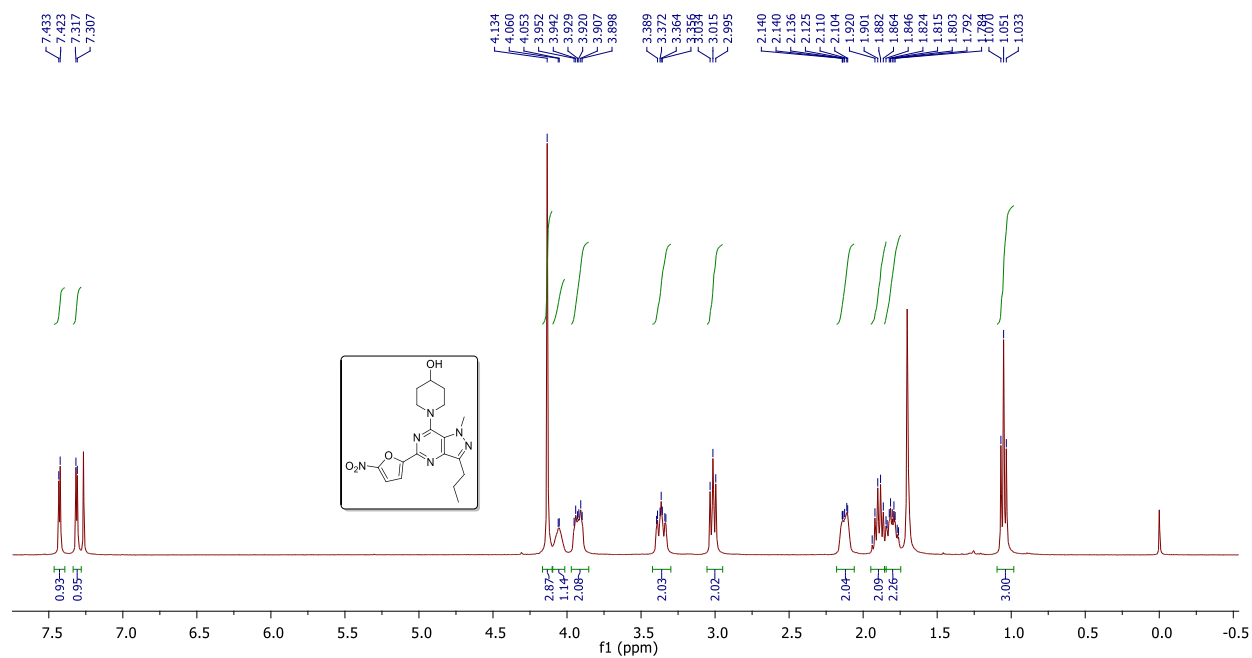

<sup>13</sup>C NMR in CDCl<sub>3</sub>

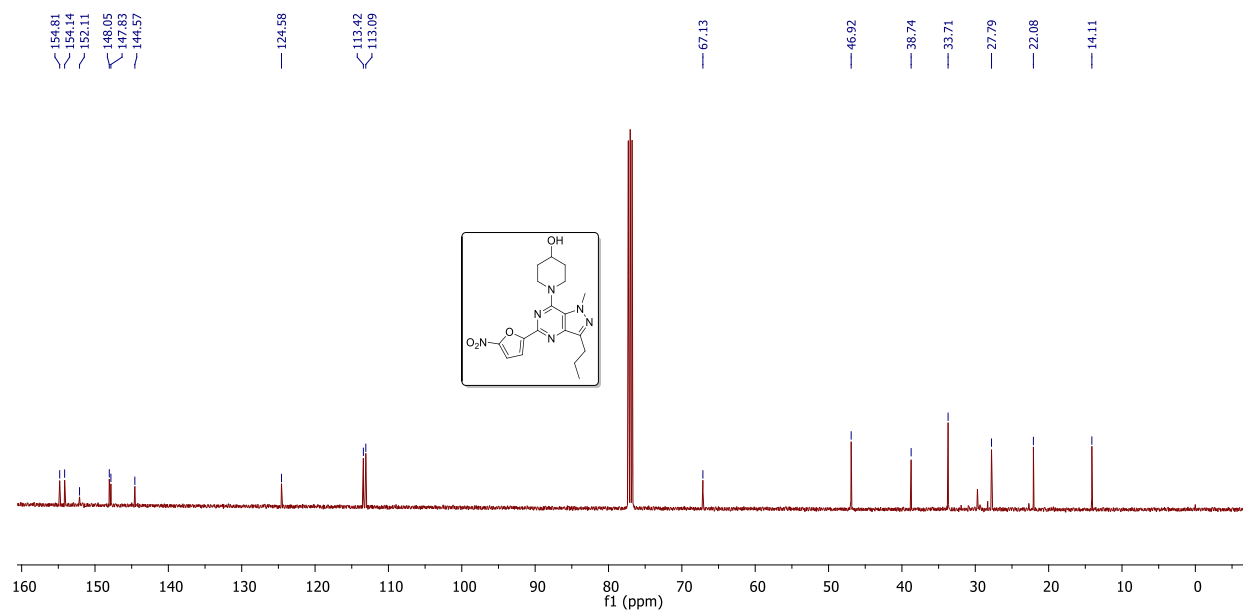

# HRMS

## Qualitative Compound Report

Data File: GLR-4-19.d  
Sample Type: Sample  
Instrument Name: Instrument 1  
Acq Method: vishal\_MS\_25072012.m  
IRM Calibration Status: Success  
Comment:  
Sample Name: GLR-4-19  
Position: Vial 15  
User Name:  
Acquired Time: 11/19/2012 1:29:54 PM  
DA Method: as.m

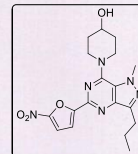

Sample Group Info.

### Compound Table

| Compound Label       | RT    | Mass      | Formula       | MFG Formula   | MFG Diff (ppm) | DB Formula    |
|----------------------|-------|-----------|---------------|---------------|----------------|---------------|
| Cpd 4: C18 H22 N6 O4 | 0.171 | 386.16965 | C18 H22 N6 O4 | C18 H22 N6 O4 | 1.57           | C18 H22 N6 O4 |

| Compound Label       | m/z       | RT    | Algorithm                 | Mass      |
|----------------------|-----------|-------|---------------------------|-----------|
| Cpd 4: C18 H22 N6 O4 | 387.17693 | 0.171 | Find by Molecular Feature | 386.16965 |

### MFE MS Spectrum

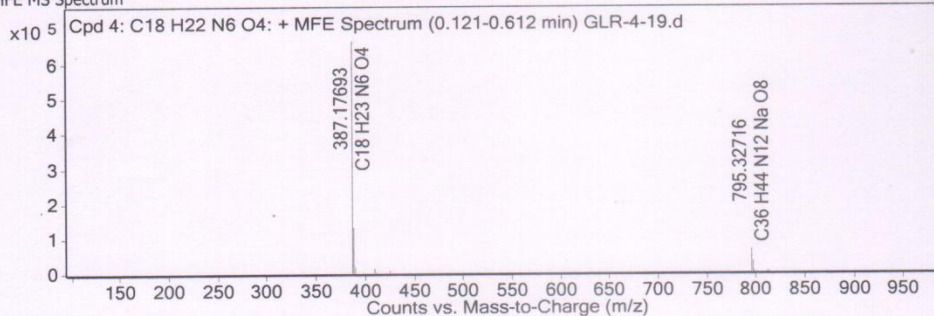

### MS Spectrum Peak List

| m/z       | z | Abund    | Formula           | Ion      |
|-----------|---|----------|-------------------|----------|
| 387.17693 | 1 | 665836.8 | C18 H23 N6 O4     | (M+H)+   |
| 388.17937 | 1 | 129635.9 | C18 H23 N6 O4     | (M+H)+   |
| 389.18176 | 1 | 17986.6  | C18 H23 N6 O4     | (M+H)+   |
| 409.15852 | 1 | 14909    | C18 H22 N6 Na O4  | (M+Na)+  |
| 410.16204 | 1 | 4156.8   | C18 H22 N6 Na O4  | (M+Na)+  |
| 425.1321  | 1 | 7910.5   | C18 H22 K N6 O4   | (M+K)+   |
| 795.32716 | 1 | 65967.1  | C36 H44 N12 Na O8 | (2M+Na)+ |
| 796.3302  | 1 | 30962.9  | C36 H44 N12 Na O8 | (2M+Na)+ |
| 797.33364 | 1 | 9136.1   | C36 H44 N12 Na O8 | (2M+Na)+ |
| 811.29841 | 1 | 2967     |                   | (2M+K)+  |

### Predicted Isotope Match Table

| Isotope | m/z       | Calc m/z  | Diff (ppm) | Abund % | Calc Abund % | Abund Sum % | Calc Abund Sum % |
|---------|-----------|-----------|------------|---------|--------------|-------------|------------------|
| 1       | 387.17693 | 387.17753 | 1.56       | 100     | 100          | 81.65       | 79.64            |
| 2       | 388.17937 | 388.1803  | 2.4        | 19.47   | 22.08        | 15.9        | 17.58            |
| 3       | 389.18176 | 389.1827  | 2.43       | 2.7     | 3.15         | 2.21        | 2.51             |
| 4       | 390.18225 | 390.18509 | 7.28       | 0.3     | 0.34         | 0.25        | 0.27             |

--- End Of Report ---

# HPLC

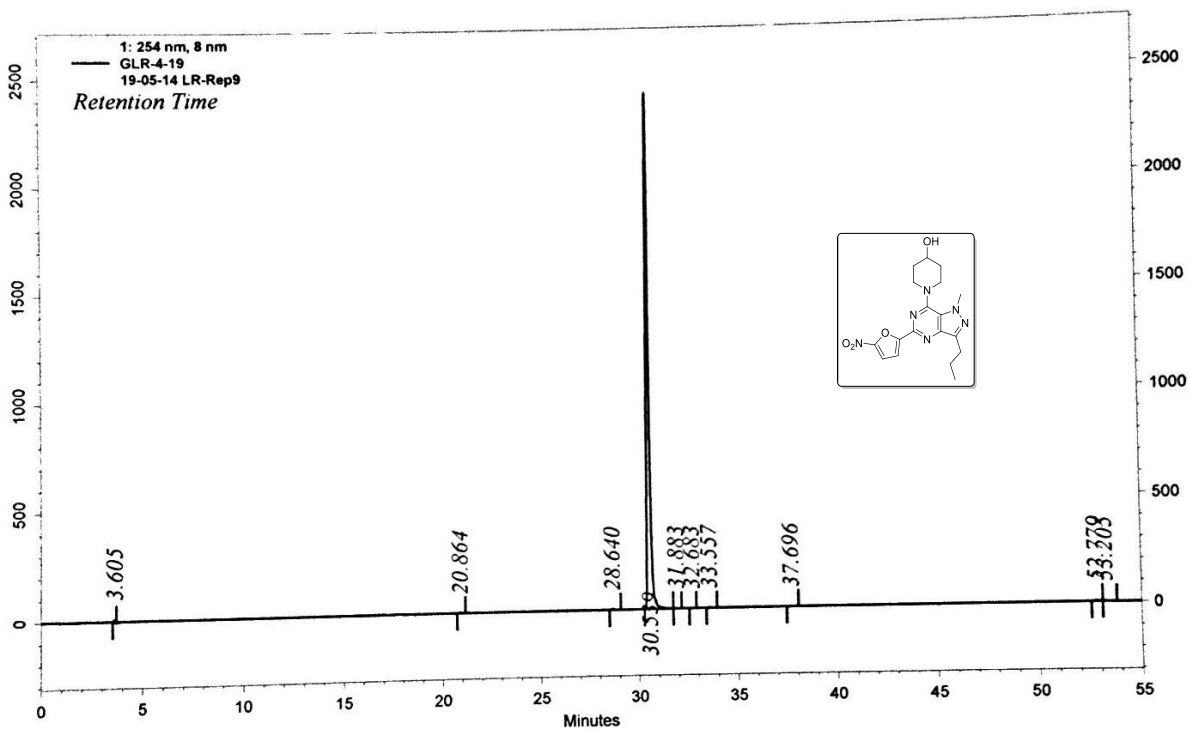

| Pk # | Retention Time | Area     | Area % | Height  | Height % |
|------|----------------|----------|--------|---------|----------|
| 1    | 3.605          | 54930    | 0.239  | 12794   | 0.524    |
| 2    | 20.864         | 17134    | 0.074  | 1898    | 0.078    |
| 3    | 28.640         | 32295    | 0.140  | 3312    | 0.136    |
| 4    | 30.539         | 22804023 | 99.052 | 2413038 | 98.879   |
| 5    | 31.883         | 11389    | 0.049  | 1313    | 0.054    |
| 6    | 32.683         | 10732    | 0.047  | 1208    | 0.050    |
| 7    | 33.557         | 26781    | 0.116  | 2355    | 0.097    |
| 8    | 37.696         | 12843    | 0.056  | 1076    | 0.044    |
| 9    | 52.779         | 34955    | 0.152  | 2777    | 0.114    |
| 10   | 53.205         | 17108    | 0.074  | 620     | 0.025    |

|        |  |          |         |         |         |
|--------|--|----------|---------|---------|---------|
| Totals |  | 23022190 | 100.000 | 2440391 | 100.000 |
|--------|--|----------|---------|---------|---------|

# Compound (17)

<sup>1</sup>H NMR in CDCl<sub>3</sub>

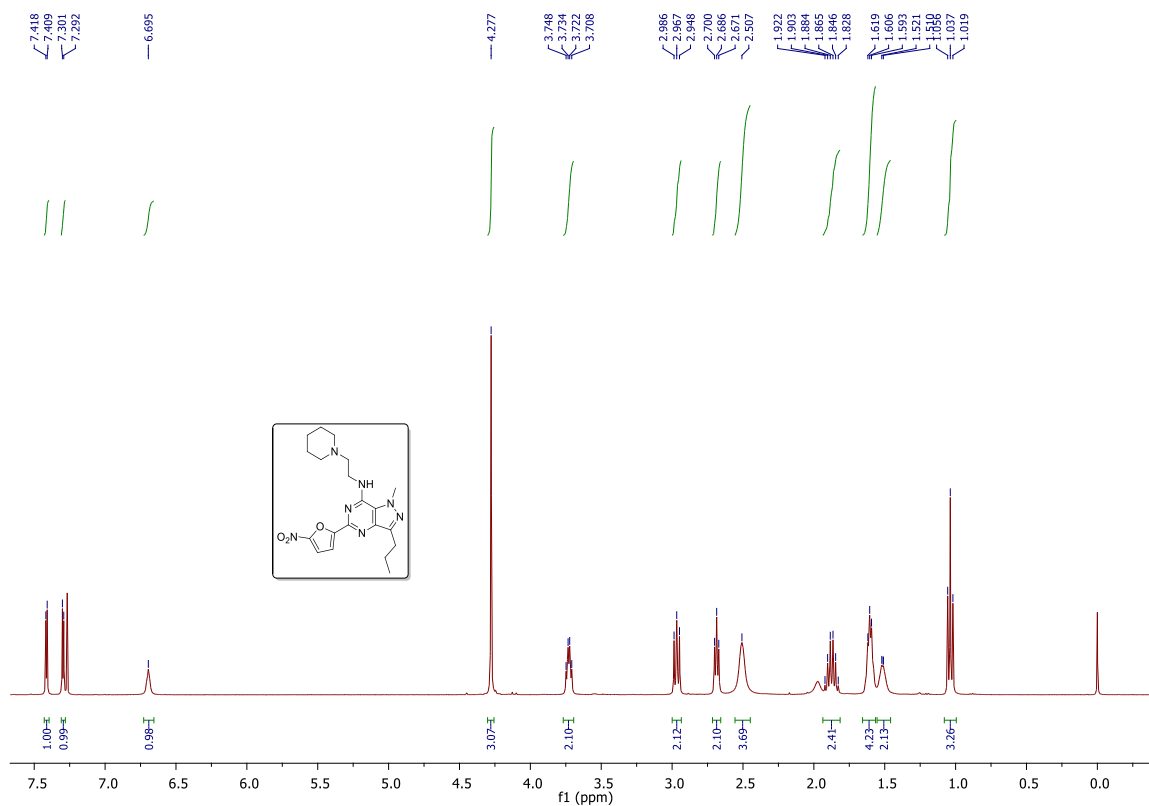

<sup>13</sup>C NMR in CDCl<sub>3</sub>

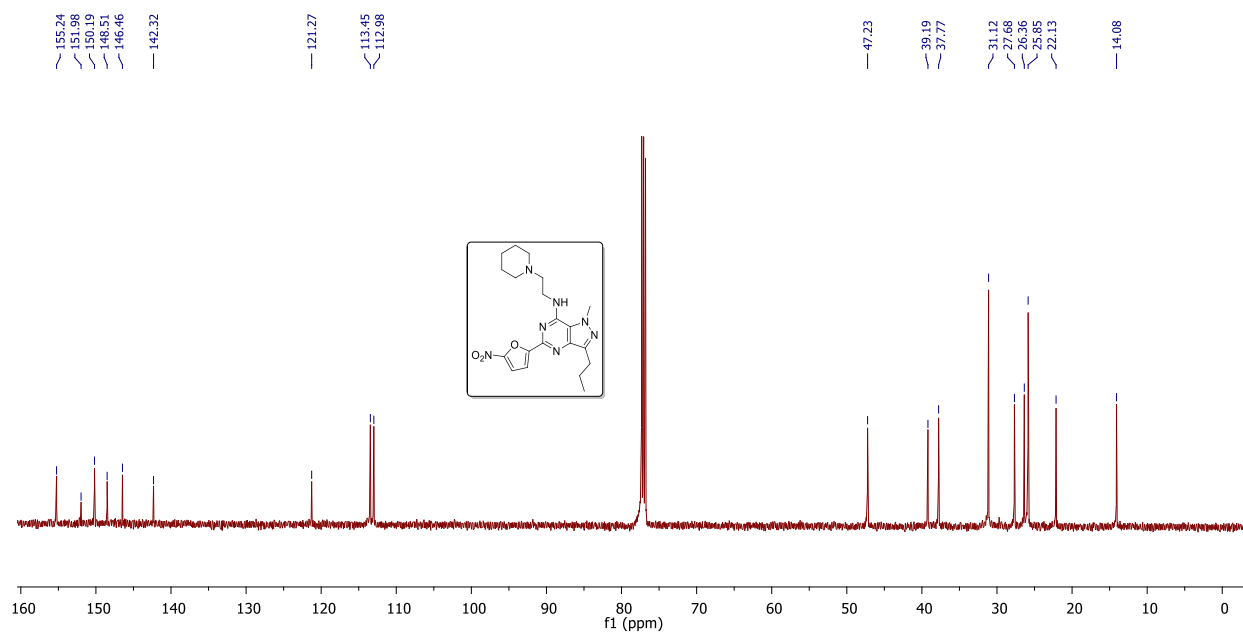



# HRMS

## Qualitative Compound Report

Data File: GLR-10.d  
Sample Type: Sample  
Instrument Name: Instrument 1  
Acq Method: vishal\_MS\_25072012.m  
IRM Calibration Status: Success  
Comment:

Sample Name: GLR-10  
Position: Vial 22  
User Name:  
Acquired Time: 11/18/2012 1:33:52 PM  
DA Method: as.m

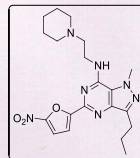

Sample Group: Info.

### Compound Table

| Compound Label        | RT    | Mass      | Formula       | MFG Formula   | MFG Diff (ppm) | DB Formula    |
|-----------------------|-------|-----------|---------------|---------------|----------------|---------------|
| Cpd 14: C20 H27 N7 O3 | 0.173 | 413.21772 | C20 H27 N7 O3 | C20 H27 N7 O3 | -0.45          | C20 H27 N7 O3 |

| Compound Label        | m/z       | RT    | Algorithm                 | Mass      |
|-----------------------|-----------|-------|---------------------------|-----------|
| Cpd 14: C20 H27 N7 O3 | 414.22501 | 0.173 | Find by Molecular Feature | 413.21772 |

### MFE MS Spectrum

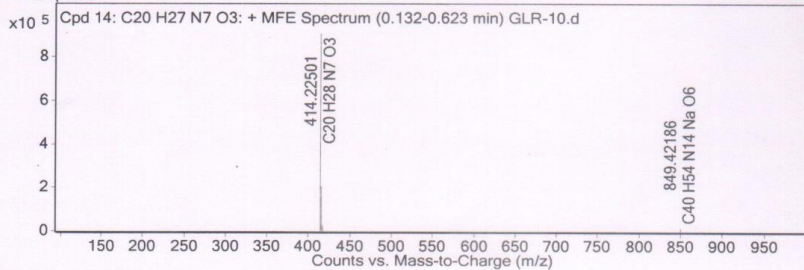

### MS Spectrum Peak List

| m/z       | z | Abund    | Formula           | Ion      |
|-----------|---|----------|-------------------|----------|
| 414.22501 | 1 | 908586.9 | C20 H28 N7 O3     | (M+H)+   |
| 415.22739 | 1 | 206451.9 | C20 H28 N7 O3     | (M+H)+   |
| 416.22999 | 1 | 29450.7  | C20 H28 N7 O3     | (M+H)+   |
| 417.23203 | 1 | 2957.2   | C20 H28 N7 O3     | (M+H)+   |
| 849.42186 | 1 | 12202.6  | C40 H54 N14 Na O6 | (2M+Na)+ |
| 850.42429 | 1 | 6220.1   | C40 H54 N14 Na O6 | (2M+Na)+ |
| 851.42824 | 1 | 1875.7   | C40 H54 N14 Na O6 | (2M+Na)+ |
| 852.42775 | 1 | 535.6    | C40 H54 N14 Na O6 | (2M+Na)+ |
| 865.39336 | 1 | 1432.2   |                   | (2M+K)+  |
| 866.39198 | 1 | 1341.6   |                   | (2M+K)+  |

### Predicted Isotope Match Table

| Isotope | m/z       | Calc m/z  | Diff (ppm) | Abund % | Calc Abund % | Abund Sum % | Calc Abund Sum % |
|---------|-----------|-----------|------------|---------|--------------|-------------|------------------|
| 1       | 414.22501 | 414.22481 | -0.46      | 100     | 100          | 79.18       | 77.81            |
| 2       | 415.22739 | 415.22755 | 0.39       | 22.72   | 24.63        | 17.99       | 19.16            |
| 3       | 416.22999 | 416.23005 | 0.15       | 3.24    | 3.53         | 2.57        | 2.74             |
| 4       | 417.23203 | 417.23247 | 1.06       | 0.33    | 0.37         | 0.26        | 0.29             |

--- End Of Report ---



# HPLC

## <Chromatogram>

mAU

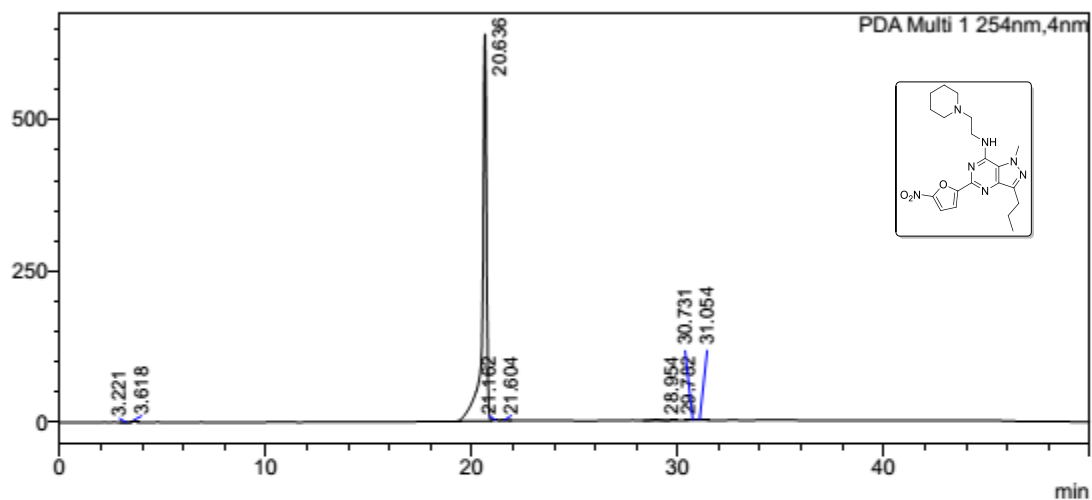

## <Peak Table>

PDA Ch1 254nm

| Peak# | Name | Ret. Time | Area    | Height | Area%   | Height% |
|-------|------|-----------|---------|--------|---------|---------|
| 1     |      | 3.221     | 4892    | 202    | 0.053   | 0.031   |
| 2     |      | 3.618     | 30622   | 4216   | 0.335   | 0.649   |
| 3     |      | 20.636    | 8993546 | 639635 | 98.284  | 98.493  |
| 4     |      | 21.162    | 13128   | 781    | 0.143   | 0.120   |
| 5     |      | 21.604    | 20699   | 1021   | 0.226   | 0.157   |
| 6     |      | 28.954    | 53571   | 1766   | 0.585   | 0.272   |
| 7     |      | 29.782    | 4796    | 428    | 0.052   | 0.066   |
| 8     |      | 30.731    | 13181   | 643    | 0.144   | 0.099   |
| 9     |      | 31.054    | 16138   | 732    | 0.176   | 0.113   |
| Total |      |           | 9150573 | 649423 | 100.000 | 100.000 |

# Compound (18)

<sup>1</sup>H NMR in CDCl<sub>3</sub>

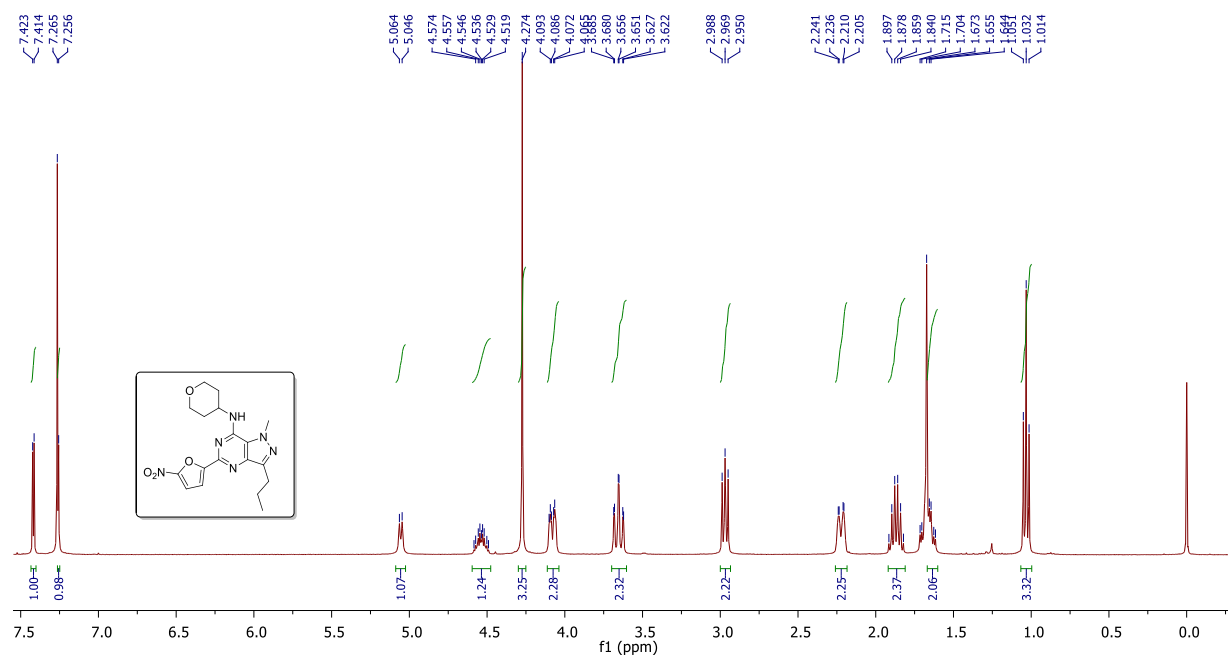

<sup>13</sup>C NMR in DMSO-d<sub>6</sub>

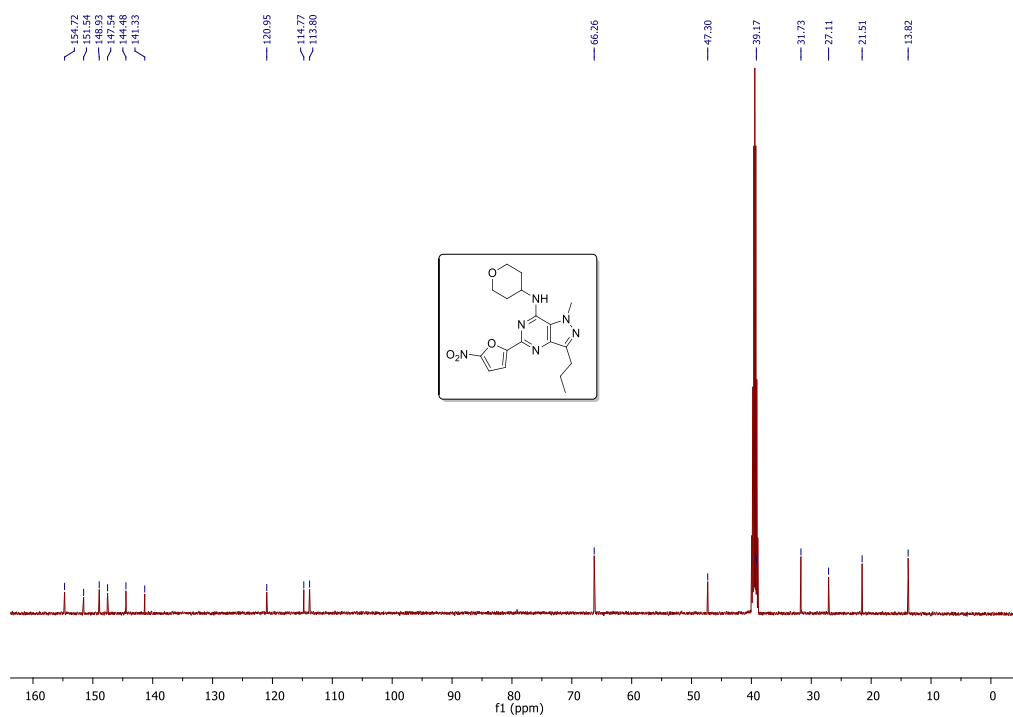

## Qualitative Compound Report

**Data File** GLR-A-48.d  
**Sample Type** Sample  
**Instrument Name** Instrument 1  
**Acq Method** vishal\_12-01-13.m  
**IRM Calibration Status** Success  
**Comment**  
**Sample Name** GLR-A-48  
**Position** Vial 14  
**User Name**  
**Acquired Time** 09-07-2013 PM 1:28:07  
**DA Method** daily\_report.m

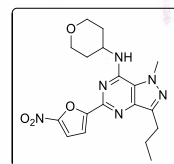

**Sample Group**  
**Acquisition SW** 6200 series TOF/6500 series  
**Version** Q-TOF B.05.01 (B5125)

## Compound Table

| Compound Label        | RT    | Mass   | Formula       | MFG Formula   | MFG Diff (ppm) | DB Formula    |
|-----------------------|-------|--------|---------------|---------------|----------------|---------------|
| Cpd 14: C18 H22 N6 O4 | 0.195 | 386.17 | C18 H22 N6 O4 | C18 H22 N6 O4 | 0.59           | C18 H22 N6 O4 |

| Compound Label        | m/z      | RT    | Algorithm                 | Mass   |
|-----------------------|----------|-------|---------------------------|--------|
| Cpd 14: C18 H22 N6 O4 | 387.1772 | 0.195 | Find by Molecular Feature | 386.17 |

## MFE MS Spectrum

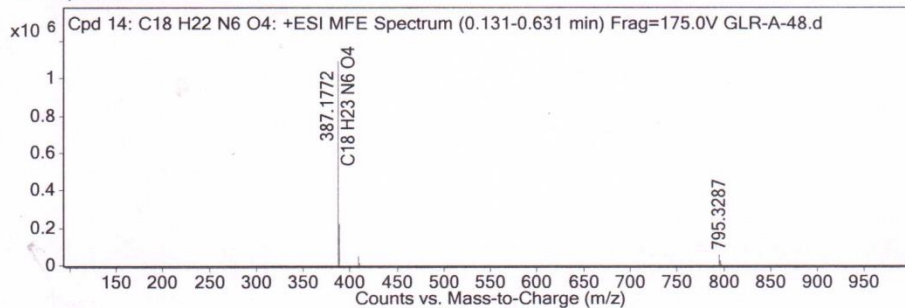

## MS Spectrum Peak List

| m/z      | z | Abund      | Formula          | Ion      |
|----------|---|------------|------------------|----------|
| 387.1772 | 1 | 1093888.25 | C18 H23 N6 O4    | (M+H)+   |
| 388.1803 | 1 | 220139.39  | C18 H23 N6 O4    | (M+H)+   |
| 389.1824 | 1 | 31397.39   | C18 H23 N6 O4    | (M+H)+   |
| 390.1851 | 1 | 2936.56    | C18 H23 N6 O4    | (M+H)+   |
| 409.1589 | 1 | 50376.5    | C18 H22 N6 Na O4 | (M+Na)+  |
| 410.1621 | 1 | 11997.29   | C18 H22 N6 Na O4 | (M+Na)+  |
| 411.1655 | 1 | 1583.14    | C18 H22 N6 Na O4 | (M+Na)+  |
| 795.3287 | 1 | 55847.41   |                  | (2M+Na)+ |
| 796.3303 | 1 | 22969.01   |                  | (2M+Na)+ |
| 797.3329 | 1 | 5699.03    |                  | (2M+Na)+ |

## Predicted Isotope Match Table

| Isotope | m/z      | Calc m/z | Diff (ppm) | Abund % | Calc Abund % | Abund Sum % | Calc Abund Sum % |
|---------|----------|----------|------------|---------|--------------|-------------|------------------|
| 1       | 387.1772 | 387.1775 | 0.72       | 100     | 100          | 81.13       | 79.64            |
| 2       | 388.1803 | 388.1803 | -0.1       | 20.12   | 22.08        | 16.33       | 17.58            |
| 3       | 389.1824 | 389.1827 | 0.74       | 2.87    | 3.15         | 2.33        | 2.51             |
| 4       | 390.1851 | 390.1851 | -0.11      | 0.27    | 0.34         | 0.22        | 0.27             |

--- End Of Report ---

# HPLC

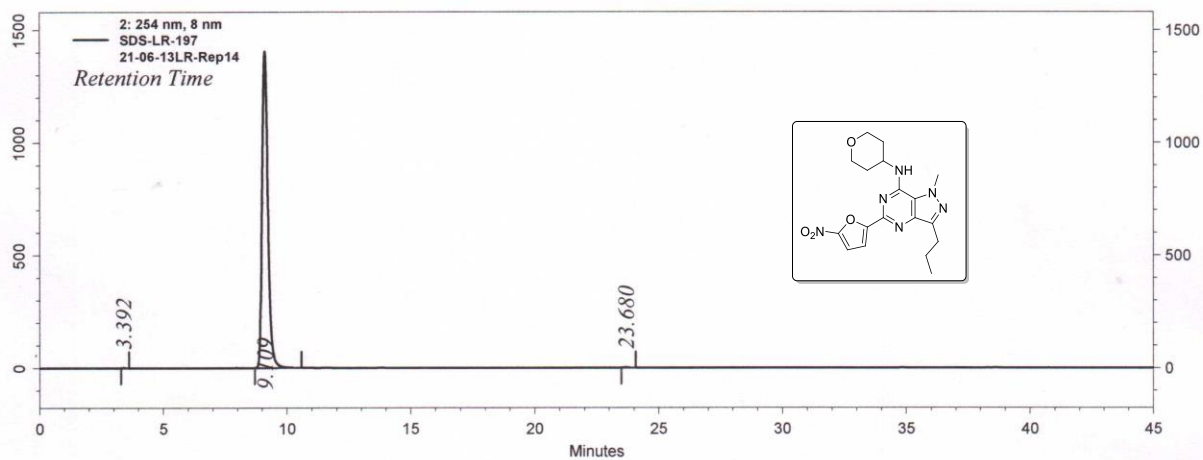

2: 254 nm, 8 nm

| Pk # | Retention Time | Area     | Area % | Height  | Height % |
|------|----------------|----------|--------|---------|----------|
| 1    | 3.392          | 11396    | 0.050  | 1609    | 0.114    |
| 2    | 9.109          | 22657961 | 99.867 | 1404888 | 99.772   |
| 3    | 23.680         | 18854    | 0.083  | 1603    | 0.114    |

|        |  |          |         |         |         |
|--------|--|----------|---------|---------|---------|
| Totals |  | 22688211 | 100.000 | 1408100 | 100.000 |
|--------|--|----------|---------|---------|---------|

# Compound (19)

$^1\text{H}$  NMR in  $\text{CDCl}_3$

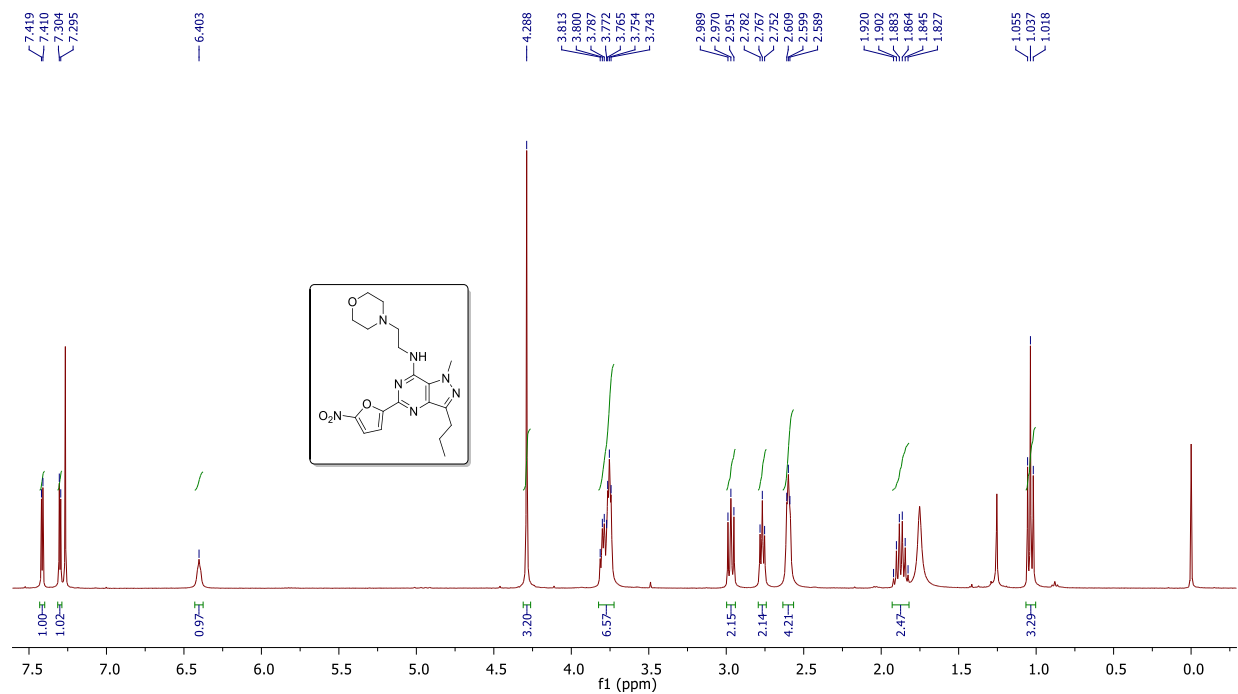

$^{13}\text{C}$  NMR in  $\text{DMSO}-d_6$

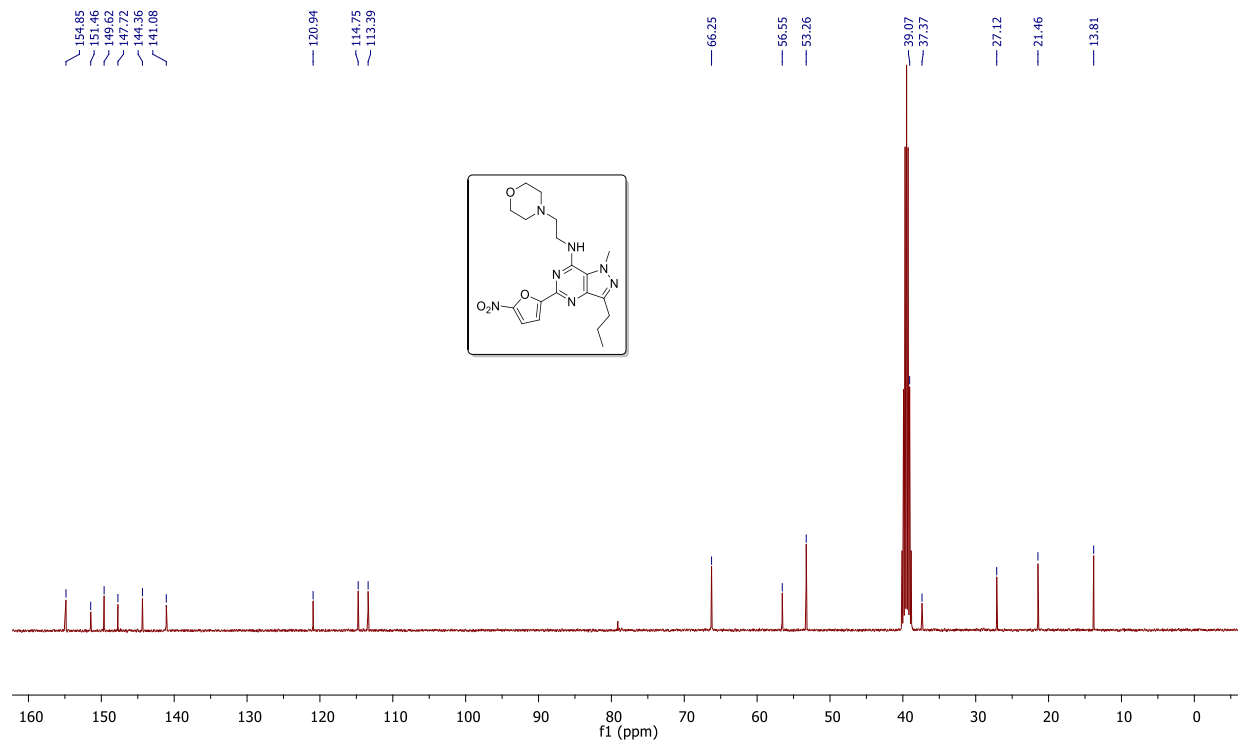

## HRMS

## Qualitative Compound Report

**Data File** GLR-A-45.d  
**Sample Type** Sample  
**Instrument Name** Instrument 1  
**Acq Method** vishal\_12-01-13.m  
**IRM Calibration Status** Success  
**Comment**  
**Sample Name** GLR-A-45  
**Position** Vial 13  
**User Name**  
**Acquired Time** 09-07-2013 PM 1:23:34  
**DA Method** daily\_report.m

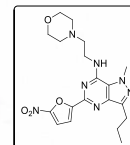

**Sample Group**  
**Acquisition SW** 6200 series TOF/6500 series  
**Version** Q-TOF B.05.01 (B5125)

## Compound Table

| Compound Label       | RT    | Mass     | Formula       | MFG Formula   | MFG Diff (ppm) | DB Formula    |
|----------------------|-------|----------|---------------|---------------|----------------|---------------|
| Cpd 6: C19 H25 N7 O4 | 0.196 | 415.1968 | C19 H25 N7 O4 | C19 H25 N7 O4 | -0.06          | C19 H25 N7 O4 |

| Compound Label       | m/z      | RT    | Algorithm                 | Mass     |
|----------------------|----------|-------|---------------------------|----------|
| Cpd 6: C19 H25 N7 O4 | 416.2041 | 0.196 | Find by Molecular Feature | 415.1968 |

## MFE MS Spectrum

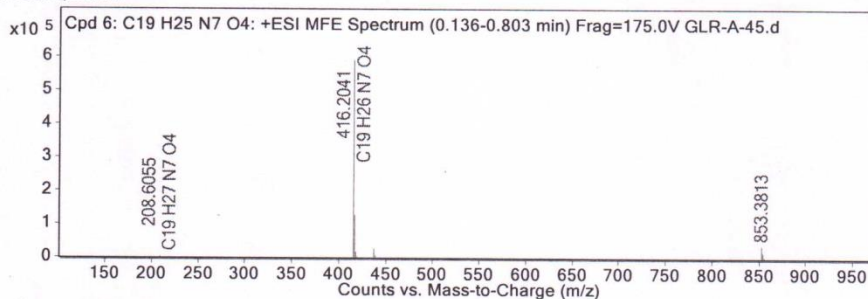

## MS Spectrum Peak List

| m/z      | z | Abund     | Formula          | Ion      |
|----------|---|-----------|------------------|----------|
| 208.6055 | 2 | 4185.32   | C19 H27 N7 O4    | (M+2H)+2 |
| 416.2041 | 1 | 590204.56 | C19 H26 N7 O4    | (M+H)+   |
| 417.2067 | 1 | 126948.38 | C19 H26 N7 O4    | (M+H)+   |
| 418.2087 | 1 | 17805.35  | C19 H26 N7 O4    | (M+H)+   |
| 419.2121 | 1 | 2345.54   | C19 H26 N7 O4    | (M+H)+   |
| 438.1859 | 1 | 27460.32  | C19 H25 N7 Na O4 | (M+Na)+  |
| 439.1881 | 1 | 6409.97   | C19 H25 N7 Na O4 | (M+Na)+  |
| 853.3813 | 1 | 38166.36  |                  | (2M+Na)+ |
| 854.3845 | 1 | 17404.52  |                  | (2M+Na)+ |
| 855.3857 | 1 | 4655.52   |                  | (2M+Na)+ |

## Predicted Isotope Match Table

| Isotope | m/z      | Calc m/z | Diff (ppm) | Abund % | Calc Abund % | Abund Sum % | Calc Abund Sum % |
|---------|----------|----------|------------|---------|--------------|-------------|------------------|
| 1       | 208.6055 | 208.6057 | 1.06       | 100     | 100          | 82.34       | 78.71            |
| 2       | 209.1079 | 209.107  | -4.35      | 14.93   | 23.57        | 12.29       | 18.55            |
| 3       | 209.6045 | 209.6082 | 17.69      | 6.52    | 3.48         | 5.37        | 2.74             |

--- End Of Report ---

# HPLC

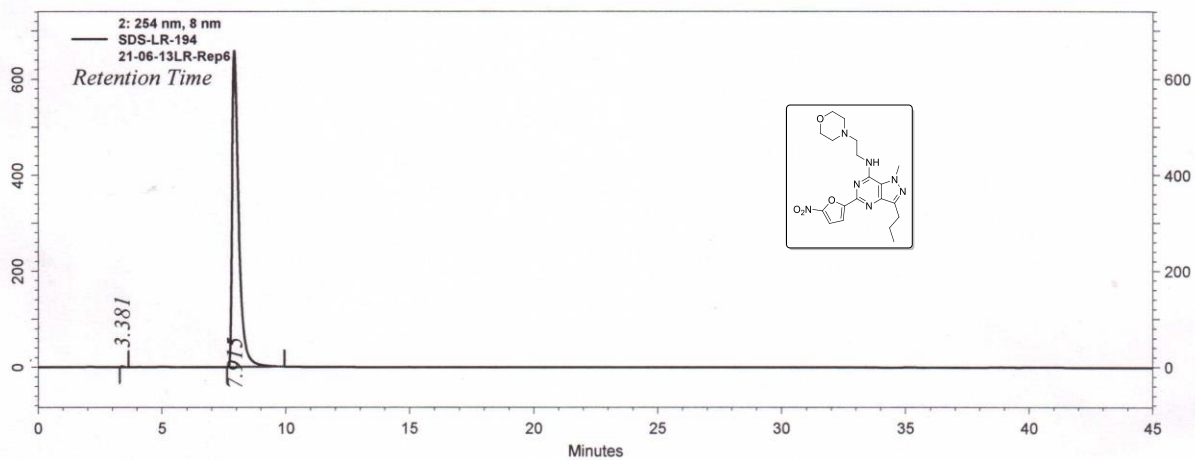

2: 254 nm, 8 nm

| Pk #   | Retention Time | Area     | Area %  | Height | Height % |
|--------|----------------|----------|---------|--------|----------|
| 1      | 3.381          | 12298    | 0.100   | 1764   | 0.267    |
| 2      | 7.915          | 12279122 | 99.900  | 658213 | 99.733   |
| Totals |                | 12291420 | 100.000 | 659977 | 100.000  |

# Compound (20)

<sup>1</sup>H NMR in CDCl<sub>3</sub>

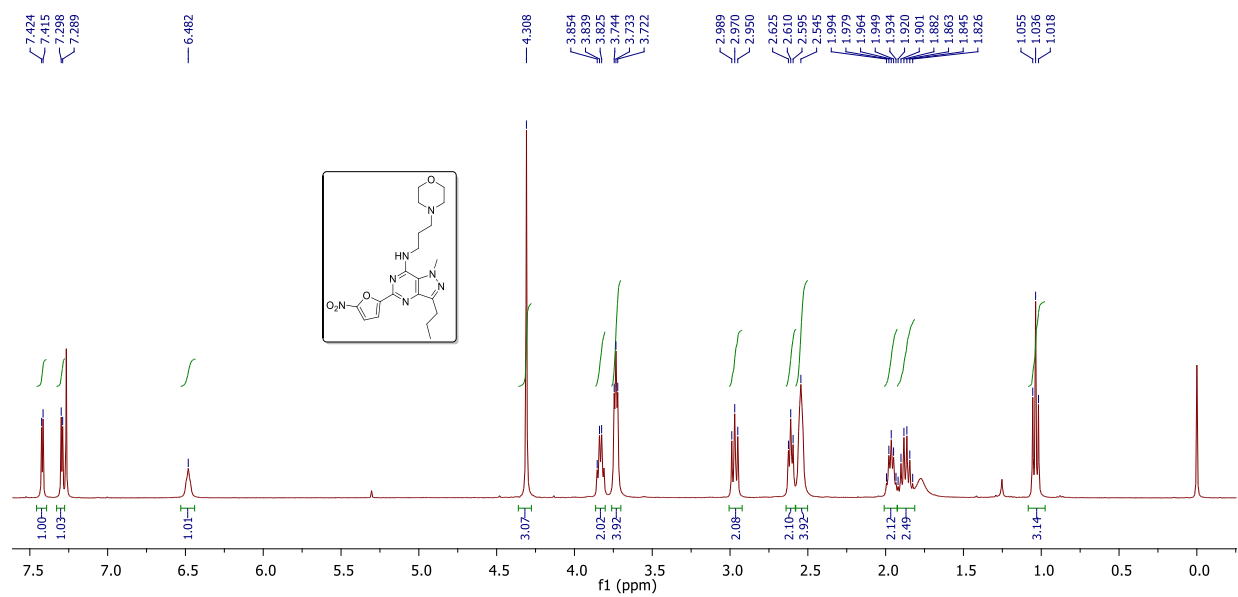

<sup>13</sup>C NMR in DMSO-d<sub>6</sub>

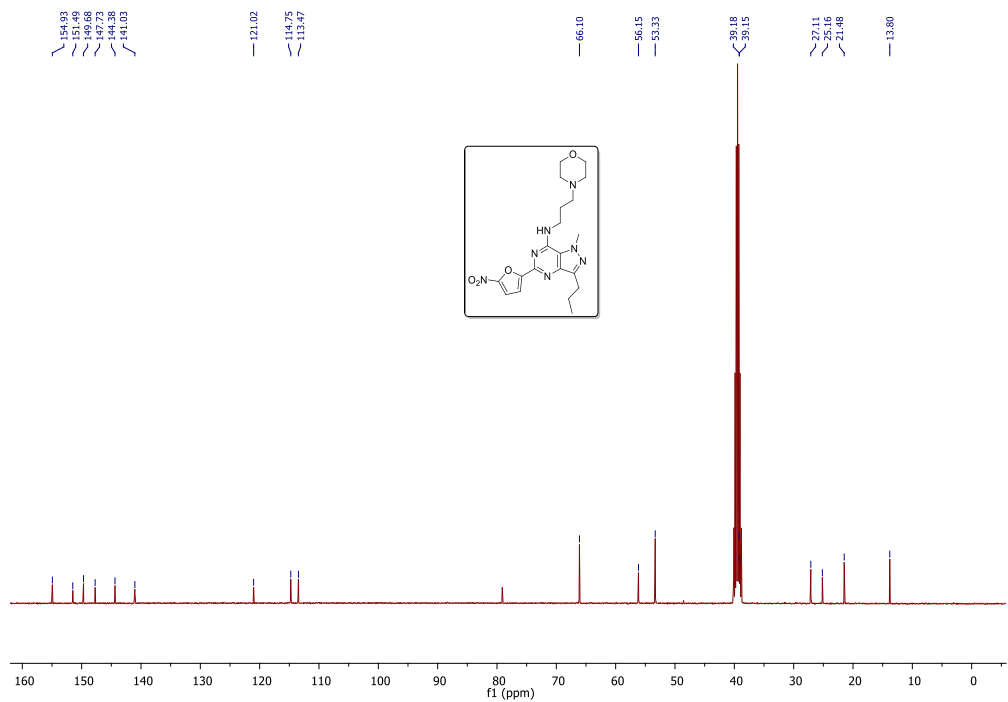



## Qualitative Compound Report

|                               |                   |                      |                        |
|-------------------------------|-------------------|----------------------|------------------------|
| <b>Data File</b>              | GLR-A-49.d        | <b>Sample Name</b>   | GLR-A-49               |
| <b>Sample Type</b>            | Sample            | <b>Position</b>      | Vial 2                 |
| <b>Instrument Name</b>        | Instrument 1      | <b>User Name</b>     |                        |
| <b>Acq Method</b>             | vishal_12-01-13.m | <b>Acquired Time</b> | 09-07-2013 PM 12:23:54 |
| <b>IRM Calibration Status</b> | Success           | <b>DA Method</b>     | daily_report.m         |
| <b>Comment</b>                |                   |                      |                        |

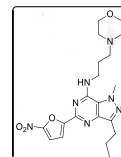

|                       |                             |
|-----------------------|-----------------------------|
| <b>Sample Group</b>   | Info.                       |
| <b>Acquisition SW</b> | 6200 series TOF/6500 series |
| <b>Version</b>        | Q-TOF B.05.01 (B5125)       |

## Compound Table

| Compound Label        | RT    | Mass     | Formula       | MFG Formula   | MFG Diff (ppm) | DB Formula    |
|-----------------------|-------|----------|---------------|---------------|----------------|---------------|
| Cpd 26: C20 H27 N7 O4 | 0.197 | 429.2126 | C20 H27 N7 O4 | C20 H27 N7 O4 | -0.38          | C20 H27 N7 O4 |

| Compound Label        | m/z    | RT    | Algorithm                 | Mass     |
|-----------------------|--------|-------|---------------------------|----------|
| Cpd 26: C20 H27 N7 O4 | 430.22 | 0.197 | Find by Molecular Feature | 429.2126 |

## MFE MS Spectrum

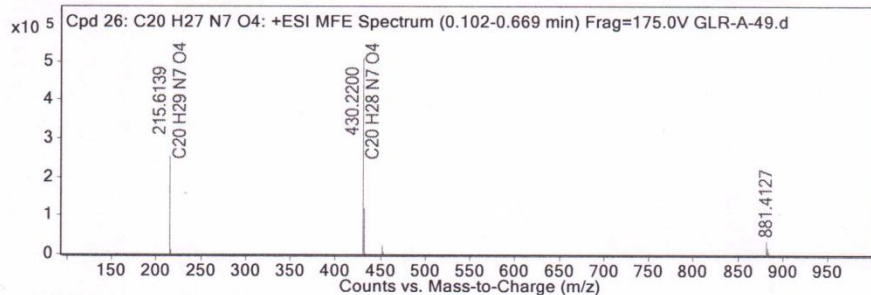

## MS Spectrum Peak List

| m/z      | z | Abund     | Formula          | Ion      |
|----------|---|-----------|------------------|----------|
| 215.6139 | 2 | 252627.44 | C20 H29 N7 O4    | (M+2H)+2 |
| 216.1154 | 2 | 62948.39  | C20 H29 N7 O4    | (M+2H)+2 |
| 216.6168 | 2 | 11303.54  | C20 H29 N7 O4    | (M+2H)+2 |
| 430.22   | 1 | 509738.03 | C20 H28 N7 O4    | (M+H)+   |
| 431.2223 | 1 | 117493.96 | C20 H28 N7 O4    | (M+H)+   |
| 432.2247 | 1 | 20226.92  | C20 H28 N7 O4    | (M+H)+   |
| 452.2012 | 1 | 21967.84  | C20 H27 N7 Na O4 | (M+Na)+  |
| 453.2034 | 1 | 7190.87   | C20 H27 N7 Na O4 | (M+Na)+  |
| 881.4127 | 1 | 34563.68  |                  | (2M+Na)+ |
| 882.4147 | 1 | 16856.13  |                  | (2M+Na)+ |

## Predicted Isotope Match Table

| Isotope | m/z      | Calc m/z | Diff (ppm) | Abund % | Calc Abund % | Abund Sum % | Calc Abund Sum % |
|---------|----------|----------|------------|---------|--------------|-------------|------------------|
| 1       | 215.6139 | 215.6135 | -1.93      | 100     | 100          | 76.77       | 77.61            |
| 2       | 216.1154 | 216.1149 | -2.3       | 24.92   | 24.67        | 19.13       | 19.15            |
| 3       | 216.6168 | 216.6161 | -3.39      | 4.47    | 3.74         | 3.43        | 2.91             |
| 4       | 217.1172 | 217.1173 | 0.42       | 0.87    | 0.42         | 0.67        | 0.33             |

--- End Of Report ---

# HPLC

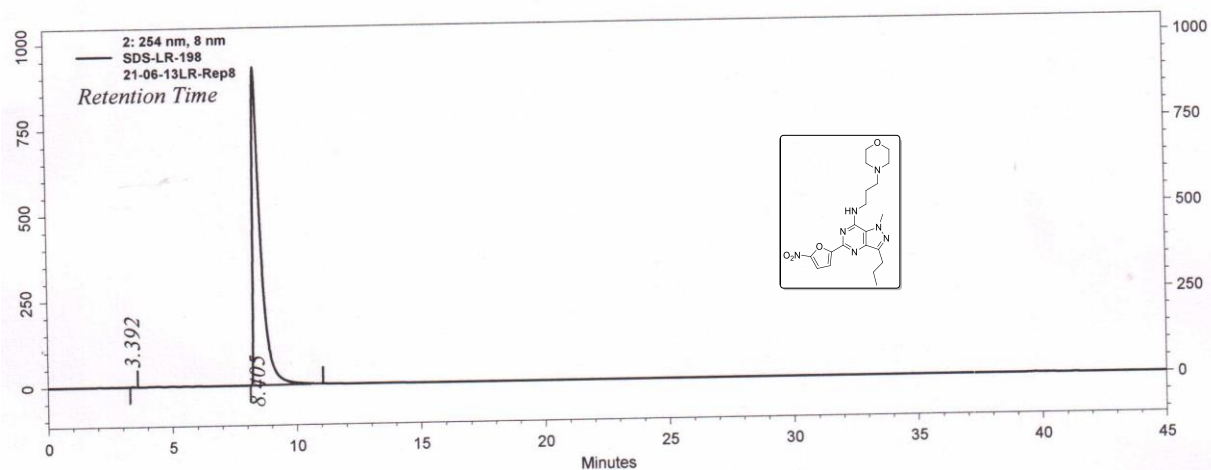

| 2: 254 nm, 8 nm |                |          |         |        |          |
|-----------------|----------------|----------|---------|--------|----------|
| Pk #            | Retention Time | Area     | Area %  | Height | Height % |
| 1               | 3.392          | 10351    | 0.049   | 1464   | 0.157    |
| 2               | 8.405          | 21015504 | 99.951  | 928471 | 99.843   |
| Totals          |                | 21025855 | 100.000 | 929935 | 100.000  |

# Compound (21)

<sup>1</sup>H NMR in CDCl<sub>3</sub>

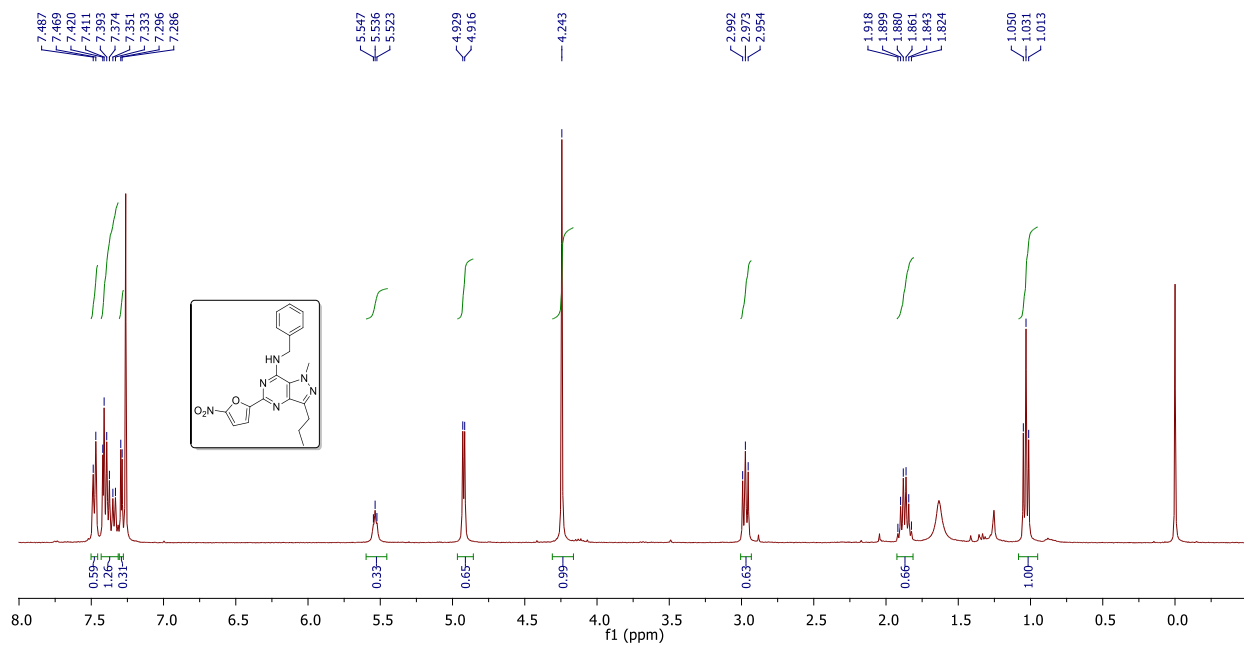

<sup>13</sup>C NMR in DMSO-d<sub>6</sub>

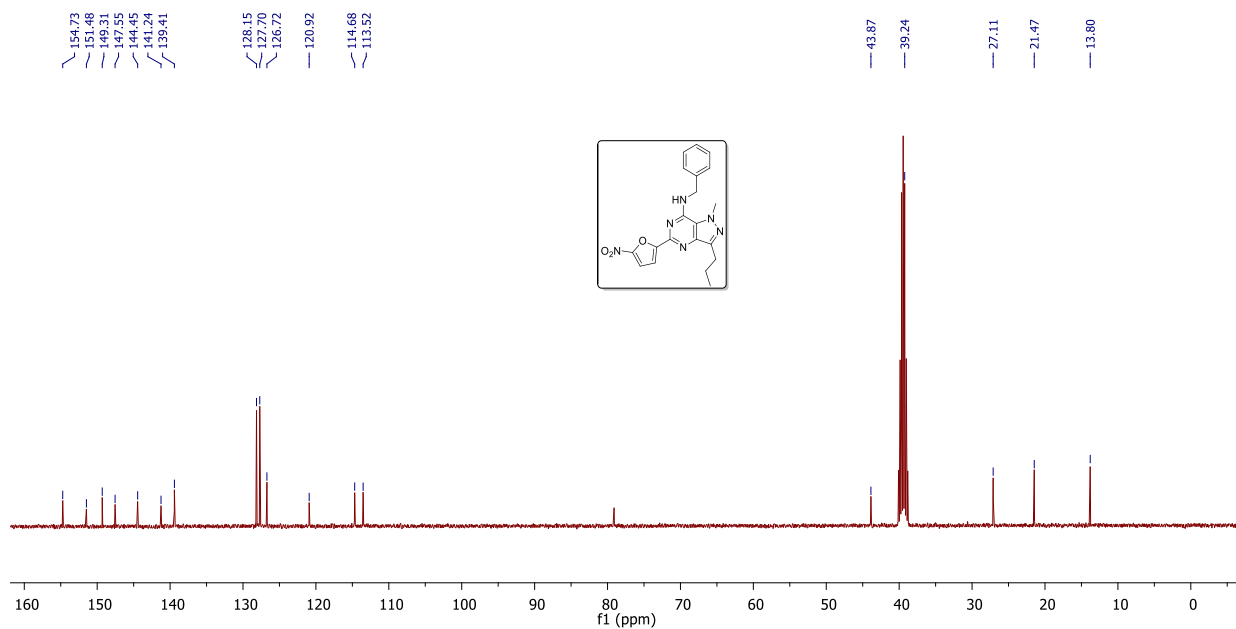

# HRMS

## Qualitative Compound Report

Data File: GLR-11.d  
Sample Type: Sample  
Instrument Name: Instrument 1  
Acq Method: vishal\_MS\_25072012.m  
IRM Calibration Status: Success  
Comment:  
Sample Name: GLR-11  
Position: Vial 23  
User Name:  
Acquired Time: 11/18/2012 1:37:22 PM  
DA Method: as.m

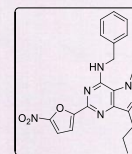

Sample Group Info.

### Compound Table

| Compound Label                                                       | RT    | Mass      | Formula                                                       | MFG Formula                                                   | MFG Diff (ppm) | DB Formula                                                    |
|----------------------------------------------------------------------|-------|-----------|---------------------------------------------------------------|---------------------------------------------------------------|----------------|---------------------------------------------------------------|
| Cpd 8: C <sub>20</sub> H <sub>20</sub> N <sub>6</sub> O <sub>3</sub> | 0.171 | 392.15963 | C <sub>20</sub> H <sub>20</sub> N <sub>6</sub> O <sub>3</sub> | C <sub>20</sub> H <sub>20</sub> N <sub>6</sub> O <sub>3</sub> | 0.14           | C <sub>20</sub> H <sub>20</sub> N <sub>6</sub> O <sub>3</sub> |

| Compound Label                                                       | m/z       | RT    | Algorithm                 | Mass      |
|----------------------------------------------------------------------|-----------|-------|---------------------------|-----------|
| Cpd 8: C <sub>20</sub> H <sub>20</sub> N <sub>6</sub> O <sub>3</sub> | 393.16691 | 0.171 | Find by Molecular Feature | 392.15963 |

### MFE MS Spectrum

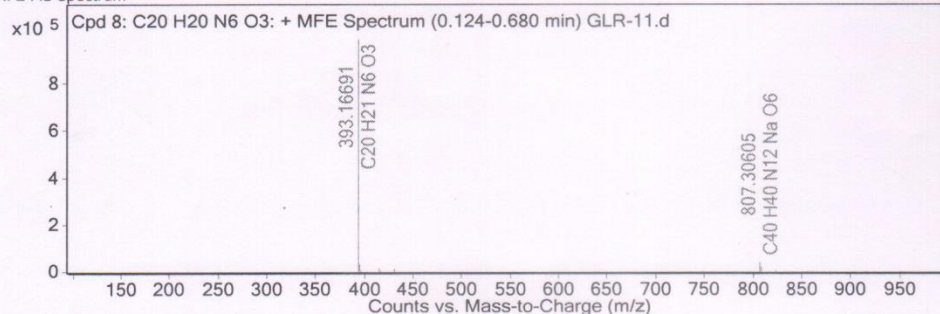

### MS Spectrum Peak List

| m/z       | z | Abund    | Formula                                                           | Ion                  |
|-----------|---|----------|-------------------------------------------------------------------|----------------------|
| 393.16691 | 1 | 990372.1 | C <sub>20</sub> H <sub>21</sub> N <sub>6</sub> O <sub>3</sub>     | (M+H) <sup>+</sup>   |
| 394.16939 | 1 | 211995.5 | C <sub>20</sub> H <sub>21</sub> N <sub>6</sub> O <sub>3</sub>     | (M+H) <sup>+</sup>   |
| 395.17143 | 1 | 30176.7  | C <sub>20</sub> H <sub>21</sub> N <sub>6</sub> O <sub>3</sub>     | (M+H) <sup>+</sup>   |
| 396.17492 | 1 | 4738.5   | C <sub>20</sub> H <sub>21</sub> N <sub>6</sub> O <sub>3</sub>     | (M+H) <sup>+</sup>   |
| 415.14774 | 1 | 15120.2  | C <sub>20</sub> H <sub>20</sub> N <sub>6</sub> Na O <sub>3</sub>  | (M+Na) <sup>+</sup>  |
| 416.14941 | 1 | 5045     | C <sub>20</sub> H <sub>20</sub> N <sub>6</sub> Na O <sub>3</sub>  | (M+Na) <sup>+</sup>  |
| 431.12167 | 1 | 9278.1   | C <sub>20</sub> H <sub>20</sub> K N <sub>6</sub> O <sub>3</sub>   | (M+K) <sup>+</sup>   |
| 807.30605 | 1 | 42466.2  | C <sub>40</sub> H <sub>40</sub> N <sub>12</sub> Na O <sub>6</sub> | (2M+Na) <sup>+</sup> |
| 808.30886 | 1 | 20448.7  | C <sub>40</sub> H <sub>40</sub> N <sub>12</sub> Na O <sub>6</sub> | (2M+Na) <sup>+</sup> |
| 823.28164 | 1 | 5097     | C <sub>40</sub> H <sub>40</sub> K N <sub>12</sub> O <sub>6</sub>  | (2M+K) <sup>+</sup>  |

### Predicted Isotope Match Table

| Isotope | m/z       | Calc m/z  | Diff (ppm) | Abund % | Calc Abund % | Abund Sum % | Calc Abund Sum % |
|---------|-----------|-----------|------------|---------|--------------|-------------|------------------|
| 1       | 393.16691 | 393.16697 | 0.13       | 100     | 100          | 80.04       | 78.15            |
| 2       | 394.16939 | 394.16978 | 1          | 21.41   | 24.18        | 17.13       | 18.9             |
| 3       | 395.17143 | 395.17232 | 2.25       | 3.05    | 3.42         | 2.44        | 2.67             |
| 4       | 396.17492 | 396.17478 | -0.35      | 0.48    | 0.36         | 0.38        | 0.28             |

--- End Of Report ---

# HPLC

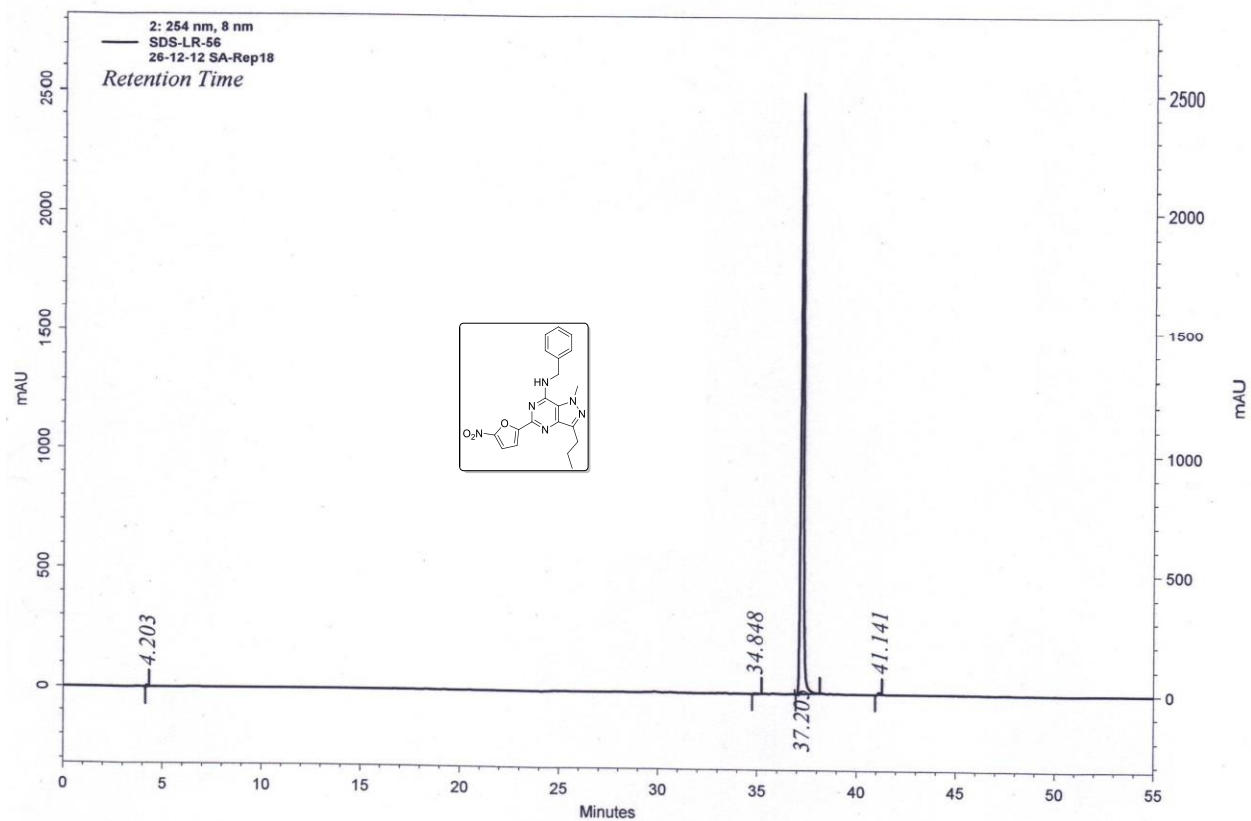

2: 254 nm, 8 nm

| Pk #   | Retention Time | Area     | Area %  | Height  | Height % |
|--------|----------------|----------|---------|---------|----------|
| 1      | 4.203          | 52812    | 0.227   | 8918    | 0.353    |
| 2      | 34.848         | 52146    | 0.224   | 3664    | 0.145    |
| 3      | 37.205         | 23118996 | 99.231  | 2502888 | 99.149   |
| 4      | 41.141         | 74268    | 0.319   | 8896    | 0.352    |
| Totals |                | 23298222 | 100.000 | 2524366 | 100.000  |

# Compound (22)

<sup>1</sup>H NMR in CDCl<sub>3</sub>

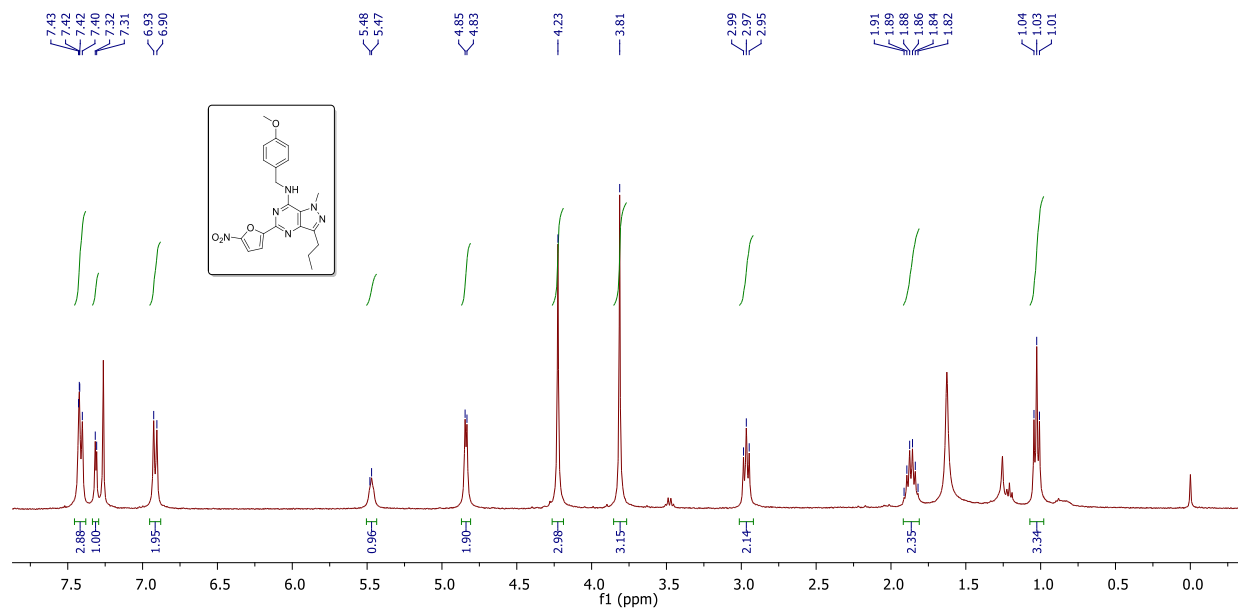

<sup>13</sup>C NMR in DMSO-d<sub>6</sub>

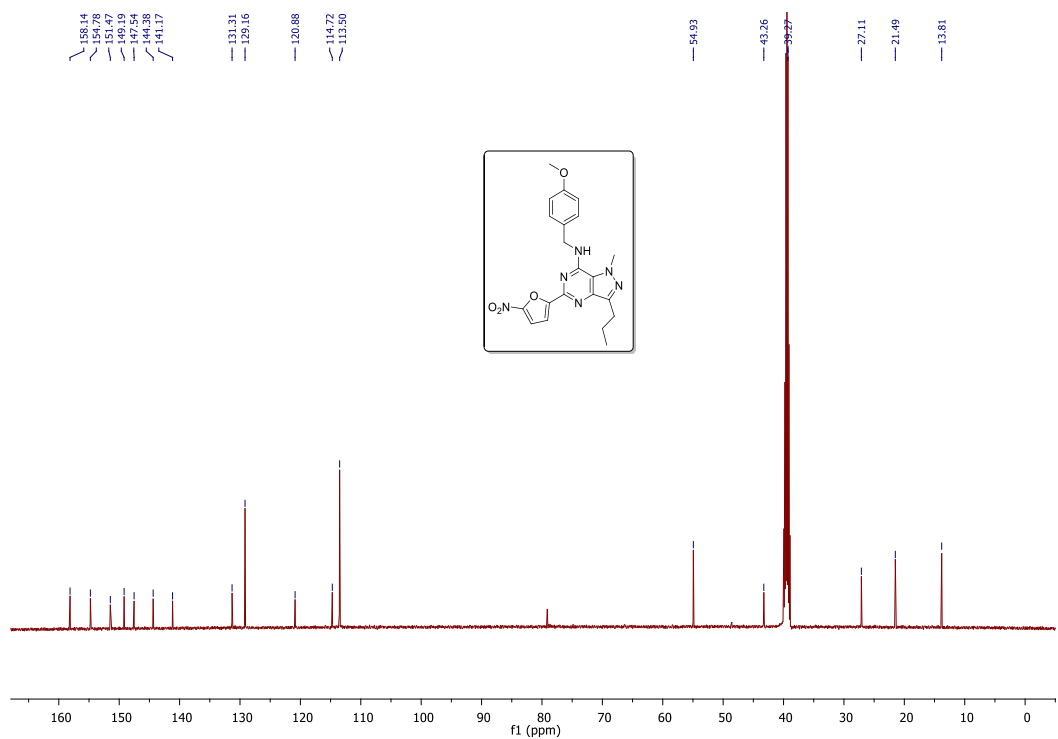



# HRMS

## Qualitative Compound Report

Data File: GLR-4-37.d  
Sample Type: Sample  
Instrument Name: Instrument 1  
Acq Method: vishal\_MS\_25072012.m  
IRM Calibration Status: Success  
Comment:

Sample Name: GLR-4-37  
Position: Vial 8  
User Name:  
Acquired Time: 11/19/2012 12:58:00 PM  
DA Method: as.m

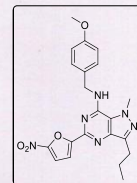

Sample Group: Info.

### Compound Table

| Compound Label       | RT    | Mass      | Formula       | MFG Formula   | MFG Diff (ppm) | DB Formula    |
|----------------------|-------|-----------|---------------|---------------|----------------|---------------|
| Cpd 3: C21 H22 N6 O4 | 0.172 | 422.16984 | C21 H22 N6 O4 | C21 H22 N6 O4 | 0.97           | C21 H22 N6 O4 |

| Compound Label       | m/z       | RT    | Algorithm                 | Mass      |
|----------------------|-----------|-------|---------------------------|-----------|
| Cpd 3: C21 H22 N6 O4 | 423.17712 | 0.172 | Find by Molecular Feature | 422.16984 |

### MFE MS Spectrum

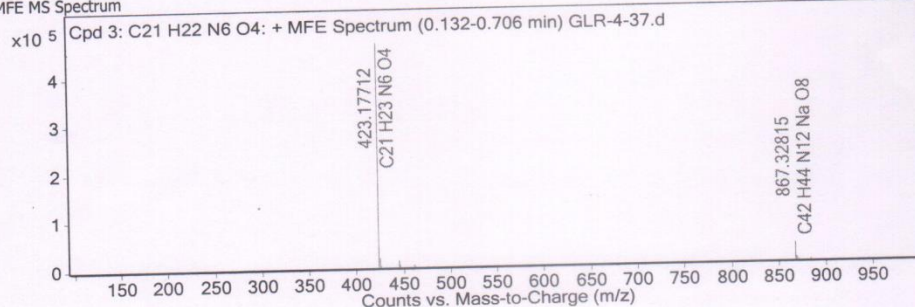

### MS Spectrum Peak List

| m/z       | z | Abund    | Formula           | Ion      |
|-----------|---|----------|-------------------|----------|
| 423.17712 | 1 | 466922.1 | C21 H23 N6 O4     | (M+H)+   |
| 424.17976 | 1 | 122132.7 | C21 H23 N6 O4     | (M+H)+   |
| 425.18177 | 1 | 18589.5  | C21 H23 N6 O4     | (M+H)+   |
| 445.15869 | 1 | 15127.3  | C21 H22 N6 Na O4  | (M+Na)+  |
| 446.16148 | 1 | 5373.9   | C21 H22 N6 Na O4  | (M+Na)+  |
| 461.13245 | 1 | 5001.9   | C21 H22 K N6 O4   | (M+K)+   |
| 867.32815 | 1 | 37016.4  | C42 H44 N12 Na O8 | (2M+Na)+ |
| 868.33036 | 1 | 18324.1  | C42 H44 N12 Na O8 | (2M+Na)+ |
| 869.33289 | 1 | 6392.2   | C42 H44 N12 Na O8 | (2M+Na)+ |
| 883.30209 | 1 | 3364     | C42 H44 K N12 O8  | (2M+K)+  |

### Predicted Isotope Match Table

| Isotope | m/z       | Calc m/z  | Diff (ppm) | Abund % | Calc Abund % | Abund Sum % | Calc Abund Sum % |
|---------|-----------|-----------|------------|---------|--------------|-------------|------------------|
| 1       | 423.17712 | 423.17753 | 0.96       | 100     | 100          | 76.61       | 77.12            |
| 2       | 424.17976 | 424.18037 | 1.46       | 26.16   | 25.32        | 20.04       | 19.53            |
| 3       | 425.18177 | 425.18289 | 2.65       | 3.98    | 3.9          | 3.05        | 3.01             |
| 4       | 426.18753 | 426.18535 | -5.11      | 0.4     | 0.45         | 0.3         | 0.34             |

--- End Of Report ---

# HPLC

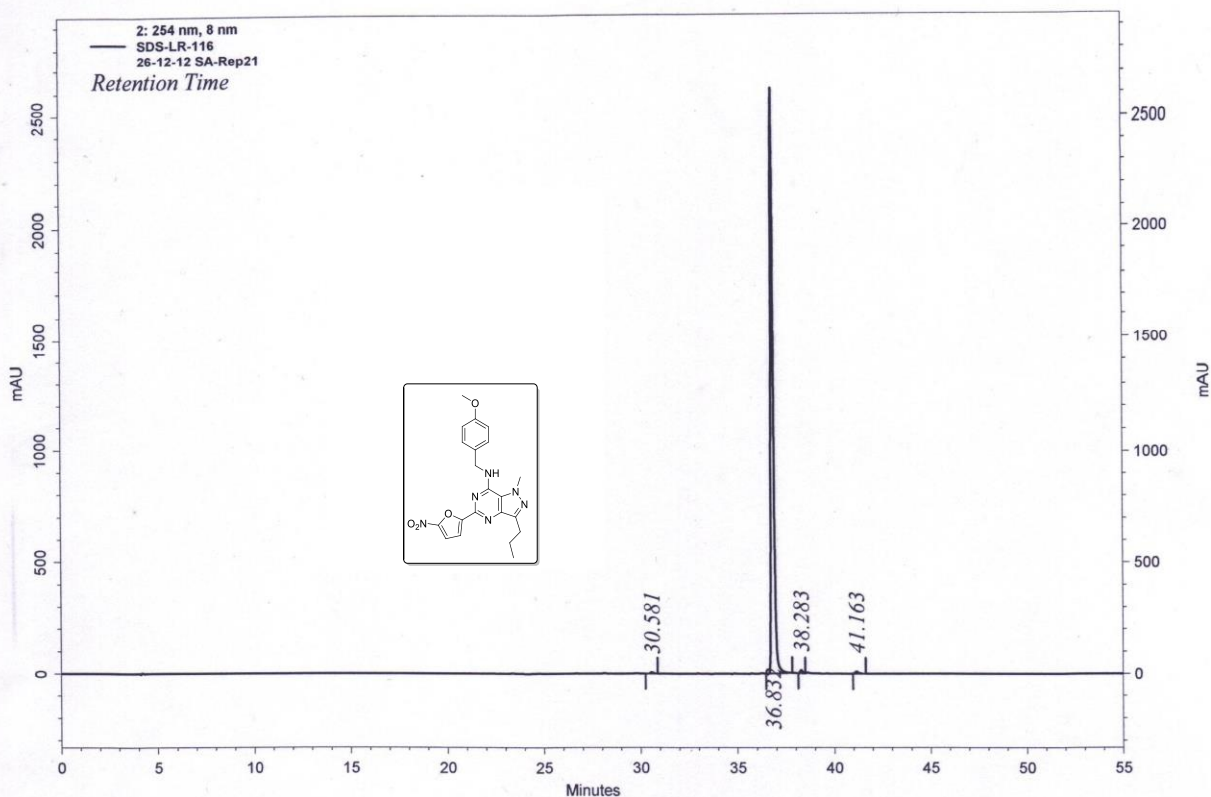

2: 254 nm, 8 nm

| Pk # | Retention Time | Area     | Area % | Height  | Height % |
|------|----------------|----------|--------|---------|----------|
| 1    | 30.581         | 58382    | 0.237  | 6347    | 0.240    |
| 2    | 36.832         | 24407072 | 98.884 | 2618768 | 98.886   |
| 3    | 38.283         | 118079   | 0.478  | 13724   | 0.518    |
| 4    | 41.163         | 98898    | 0.401  | 9437    | 0.356    |

|        |  |          |         |         |         |
|--------|--|----------|---------|---------|---------|
| Totals |  | 24682431 | 100.000 | 2648276 | 100.000 |
|--------|--|----------|---------|---------|---------|

# Compound (23)

<sup>1</sup>H NMR in CDCl<sub>3</sub>

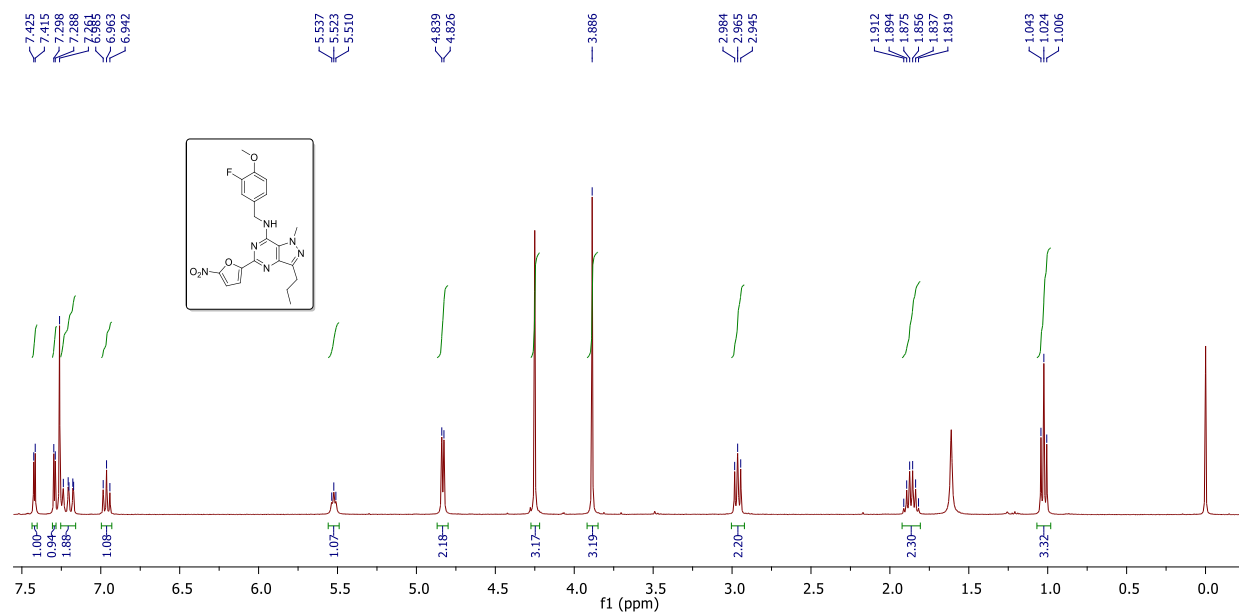

<sup>13</sup>C NMR in DMSO-d<sub>6</sub>

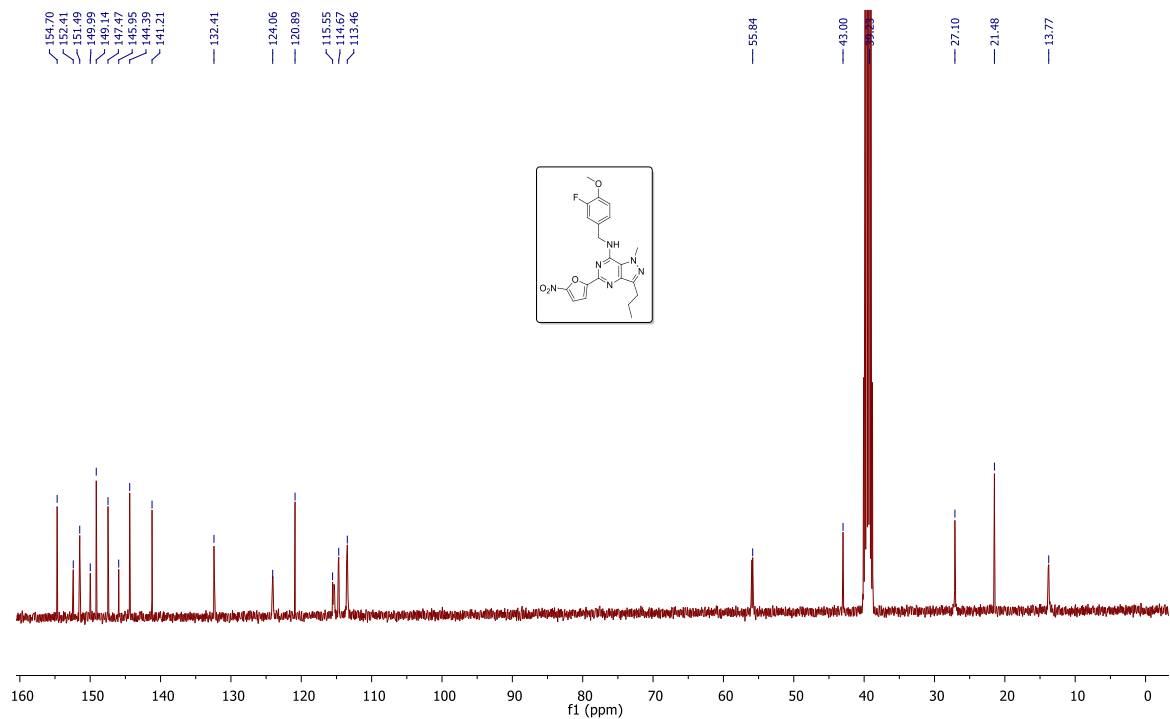

## Qualitative Compound Report

**Data File** GLR-4-34.d **Sample Name** GLR-4-34  
**Sample Type** Sample **Position** Vial 5  
**Instrument Name** Instrument 1 **User Name**  
**Acq Method** vishal\_MS\_25072012.m **Acquired Time** 11/19/2012 12:43:51 PM  
**IRM Calibration Status** Success **DA Method** as.m  
**Comment**

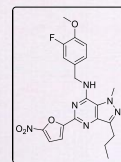

**Sample Group** **Info.**

## Compound Table

| Compound Label         | RT    | Mass      | Formula         | MFG Formula     | MFG Diff (ppm) | DB Formula      |
|------------------------|-------|-----------|-----------------|-----------------|----------------|-----------------|
| Cpd 7: C21 H21 F N6 O4 | 0.172 | 440.16055 | C21 H21 F N6 O4 | C21 H21 F N6 O4 | 0.65           | C21 H21 F N6 O4 |

| Compound Label         | m/z       | RT    | Algorithm                 | Mass      |
|------------------------|-----------|-------|---------------------------|-----------|
| Cpd 7: C21 H21 F N6 O4 | 441.16783 | 0.172 | Find by Molecular Feature | 440.16055 |

## MFE MS Spectrum

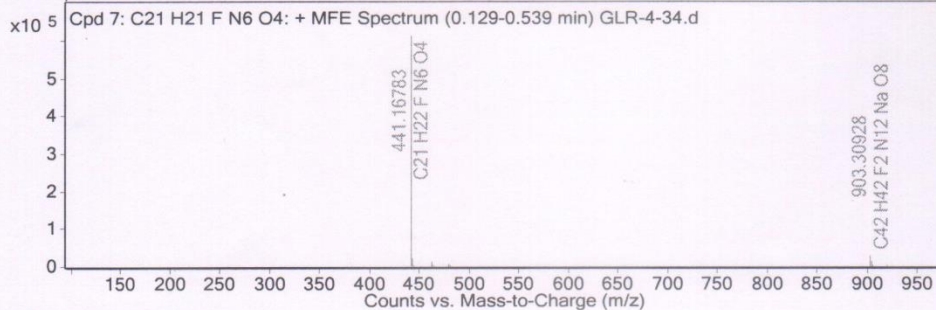

## MS Spectrum Peak List

| m/z       | z | Abund    | Formula              | Ion      |
|-----------|---|----------|----------------------|----------|
| 441.16783 | 1 | 612374.8 | C21 H22 F N6 O4      | (M+H)+   |
| 442.17029 | 1 | 143914   | C21 H22 F N6 O4      | (M+H)+   |
| 443.17311 | 1 | 21446.9  | C21 H22 F N6 O4      | (M+H)+   |
| 444.17514 | 1 | 3302.3   | C21 H22 F N6 O4      | (M+H)+   |
| 463.14834 | 1 | 12489.3  | C21 H21 F N6 Na O4   | (M+Na)+  |
| 479.12258 | 1 | 5574.6   | C21 H21 F K N6 O4    | (M+K)+   |
| 903.30928 | 1 | 26851.2  | C42 H42 F2 N12 Na O8 | (2M+Na)+ |
| 904.30993 | 1 | 13429.6  | C42 H42 F2 N12 Na O8 | (2M+Na)+ |
| 905.31342 | 1 | 3559.8   | C42 H42 F2 N12 Na O8 | (2M+Na)+ |
| 919.28295 | 1 | 3761.6   |                      | (2M+K)+  |

## Predicted Isotope Match Table

| Isotope | m/z       | Calc m/z  | Diff (ppm) | Abund % | Calc Abund % | Abund Sum % | Calc Abund Sum % |
|---------|-----------|-----------|------------|---------|--------------|-------------|------------------|
| 1       | 441.16783 | 441.16811 | 0.64       | 100     | 100          | 78.41       | 77.13            |
| 2       | 442.17029 | 442.17095 | 1.49       | 23.5    | 25.31        | 18.43       | 19.52            |
| 3       | 443.17311 | 443.17347 | 0.8        | 3.5     | 3.9          | 2.75        | 3.01             |
| 4       | 444.17514 | 444.17592 | 1.75       | 0.54    | 0.45         | 0.42        | 0.34             |

--- End Of Report ---



# HPLC

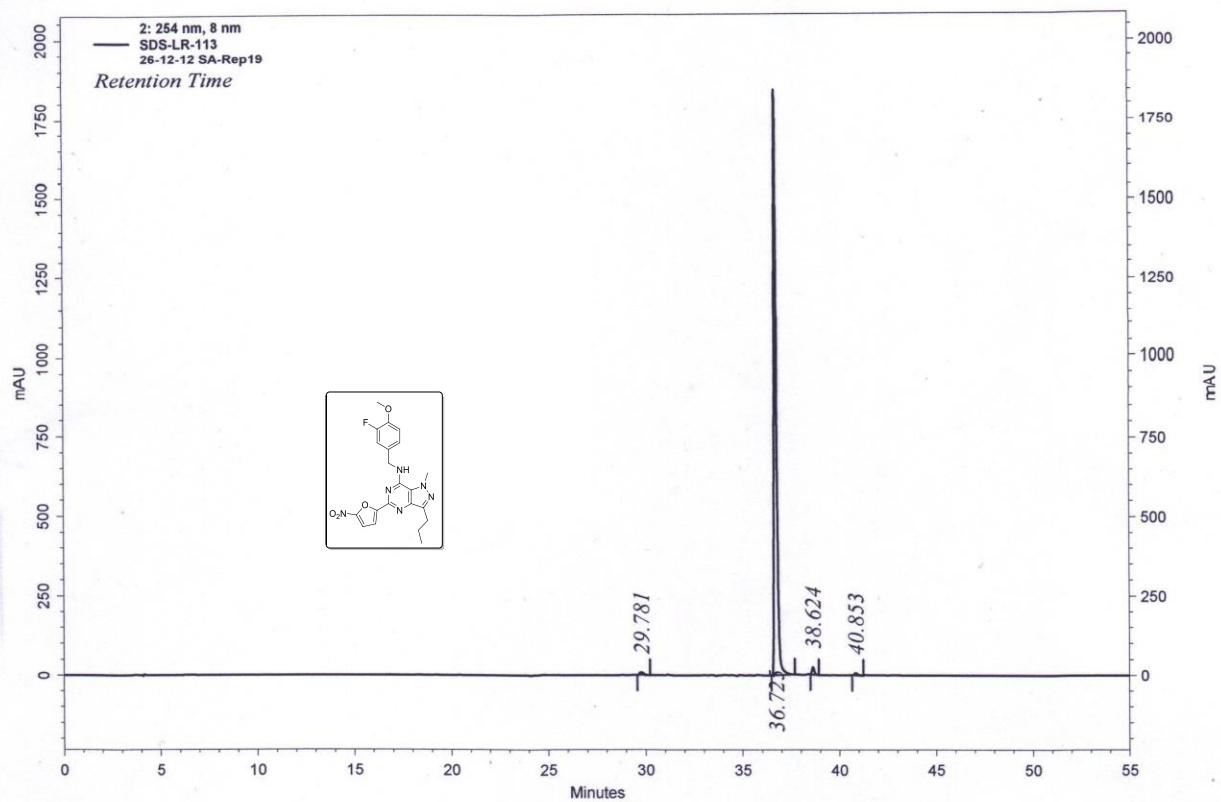

2: 254 nm, 8 nm

| Pk # | Retention Time | Area     | Area % | Height  | Height % |
|------|----------------|----------|--------|---------|----------|
| 1    | 29.781         | 132067   | 0.766  | 8988    | 0.477    |
| 2    | 36.725         | 16808630 | 97.543 | 1844087 | 97.844   |
| 3    | 38.624         | 204399   | 1.186  | 24289   | 1.289    |
| 4    | 40.853         | 86956    | 0.505  | 7350    | 0.390    |

|        |  |          |         |         |         |
|--------|--|----------|---------|---------|---------|
| Totals |  | 17232052 | 100.000 | 1884714 | 100.000 |
|--------|--|----------|---------|---------|---------|

# Compound (24)

<sup>1</sup>H NMR in CDCl<sub>3</sub>

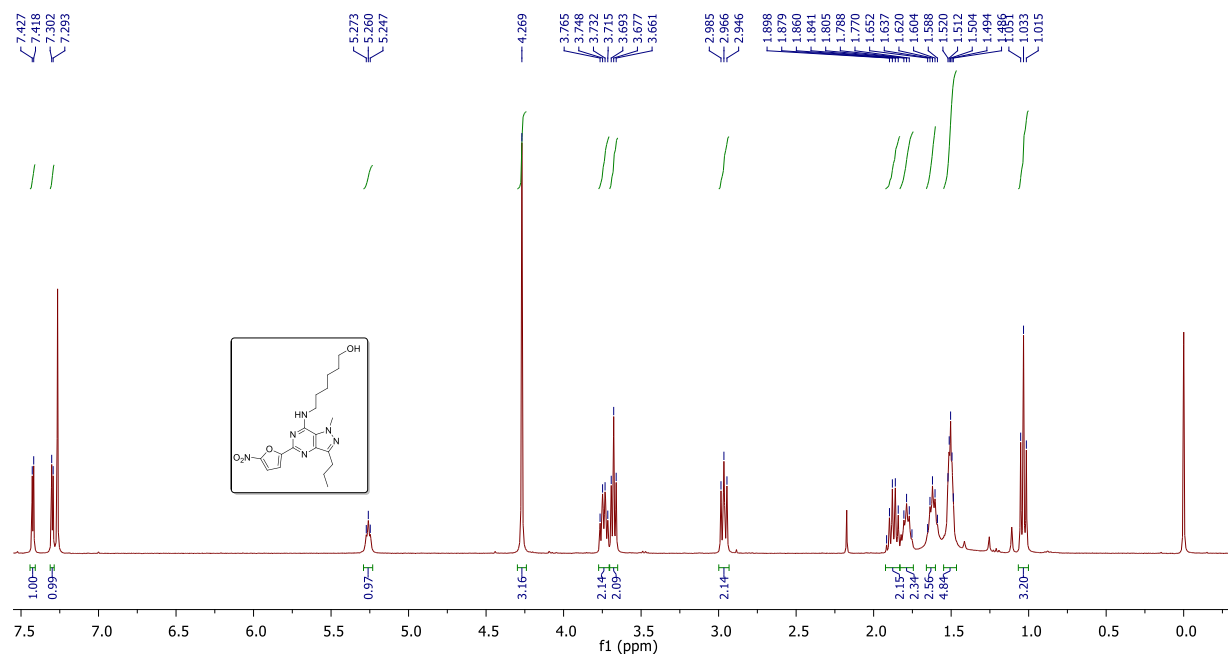

<sup>13</sup>C NMR in DMSO-d<sub>6</sub>

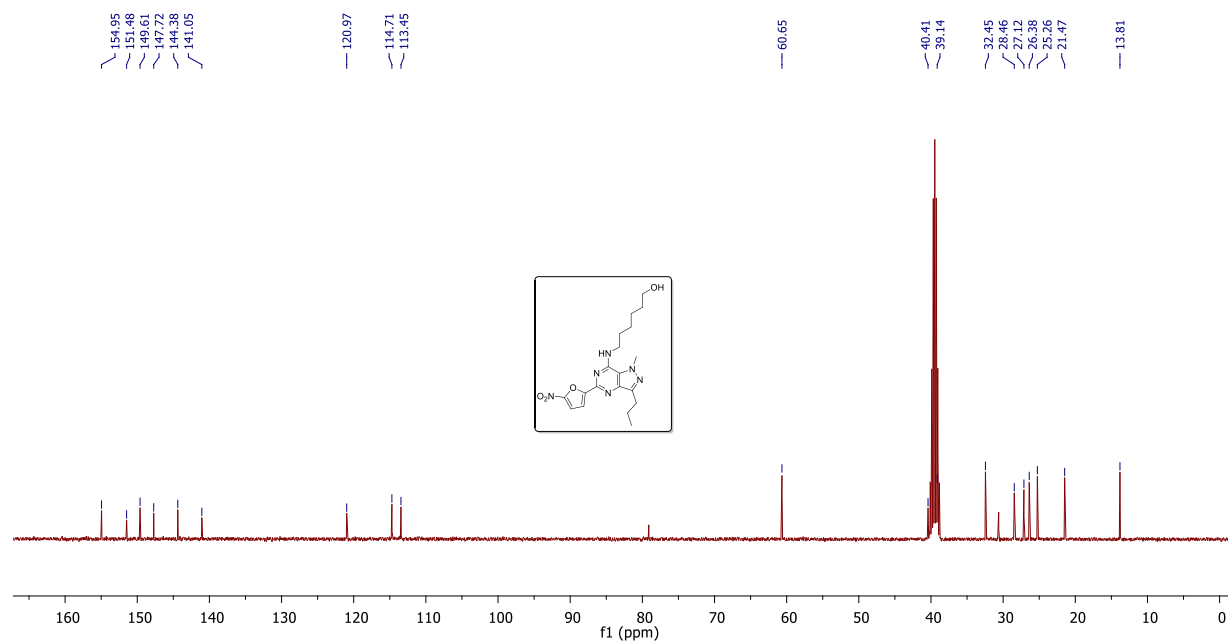



# HRMS

## Qualitative Compound Report

Data File: GLR-8.d  
Sample Type: Sample  
Instrument Name: Instrument 1  
Acq Method: vishal\_MS\_25072012.m  
IRM Calibration Status: Success  
Comment:  
Sample Name: GLR-8  
Position: Vial 20  
User Name:  
Acquired Time: 11/18/2012 1:26:45 PM  
DA Method: as.m

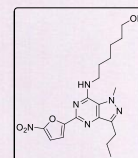

Sample Group Info.

### Compound Table

| Compound Label       | RT    | Mass      | Formula       | MFG Formula   | MFG Diff (ppm) | DB Formula    |
|----------------------|-------|-----------|---------------|---------------|----------------|---------------|
| Cpd 4: C19 H26 N6 O4 | 0.172 | 402.20115 | C19 H26 N6 O4 | C19 H26 N6 O4 | 1.01           | C19 H26 N6 O4 |

| Compound Label       | m/z       | RT    | Algorithm                 | Mass      |
|----------------------|-----------|-------|---------------------------|-----------|
| Cpd 4: C19 H26 N6 O4 | 403.20843 | 0.172 | Find by Molecular Feature | 402.20115 |

### MFE MS Spectrum

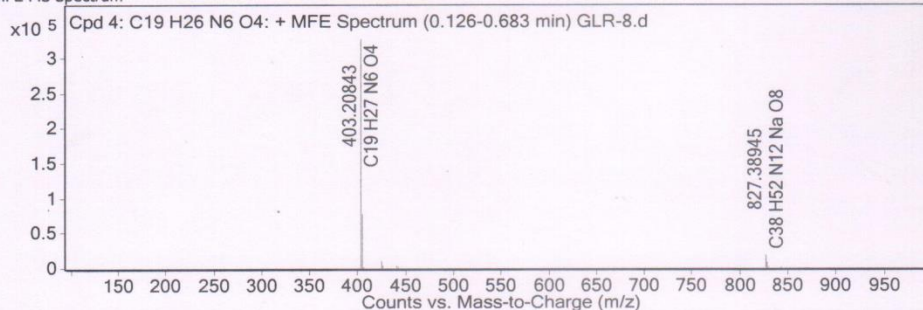

### MS Spectrum Peak List

| m/z       | z | Abund    | Formula           | Ion      |
|-----------|---|----------|-------------------|----------|
| 403.20843 | 1 | 326763.5 | C19 H27 N6 O4     | (M+H)+   |
| 404.21069 | 1 | 77385.1  | C19 H27 N6 O4     | (M+H)+   |
| 405.21287 | 1 | 12710.9  | C19 H27 N6 O4     | (M+H)+   |
| 425.18996 | 1 | 10795.1  | C19 H26 N6 Na O4  | (M+Na)+  |
| 426.19267 | 1 | 2774.4   | C19 H26 N6 Na O4  | (M+Na)+  |
| 441.16296 | 1 | 4205.6   | C19 H26 K N6 O4   | (M+K)+   |
| 827.38945 | 1 | 18009.8  | C38 H52 N12 Na O8 | (2M+Na)+ |
| 828.39343 | 1 | 8280.5   | C38 H52 N12 Na O8 | (2M+Na)+ |
| 829.39711 | 1 | 1817.5   | C38 H52 N12 Na O8 | (2M+Na)+ |
| 843.3663  | 1 | 1312.6   | C38 H52 K N12 O8  | (2M+K)+  |

### Predicted Isotope Match Table

| Isotope | m/z       | Calc m/z  | Diff (ppm) | Abund % | Calc Abund % | Abund Sum % | Calc Abund Sum % |
|---------|-----------|-----------|------------|---------|--------------|-------------|------------------|
| 1       | 403.20843 | 403.20883 | 0.99       | 100     | 100          | 78.17       | 78.75            |
| 2       | 404.21069 | 404.21163 | 2.33       | 23.68   | 23.2         | 18.51       | 18.27            |
| 3       | 405.21287 | 405.21408 | 2.99       | 3.89    | 3.4          | 3.04        | 2.68             |
| 4       | 406.21737 | 406.2165  | -2.15      | 0.35    | 0.37         | 0.28        | 0.29             |

--- End Of Report ---

# HPLC

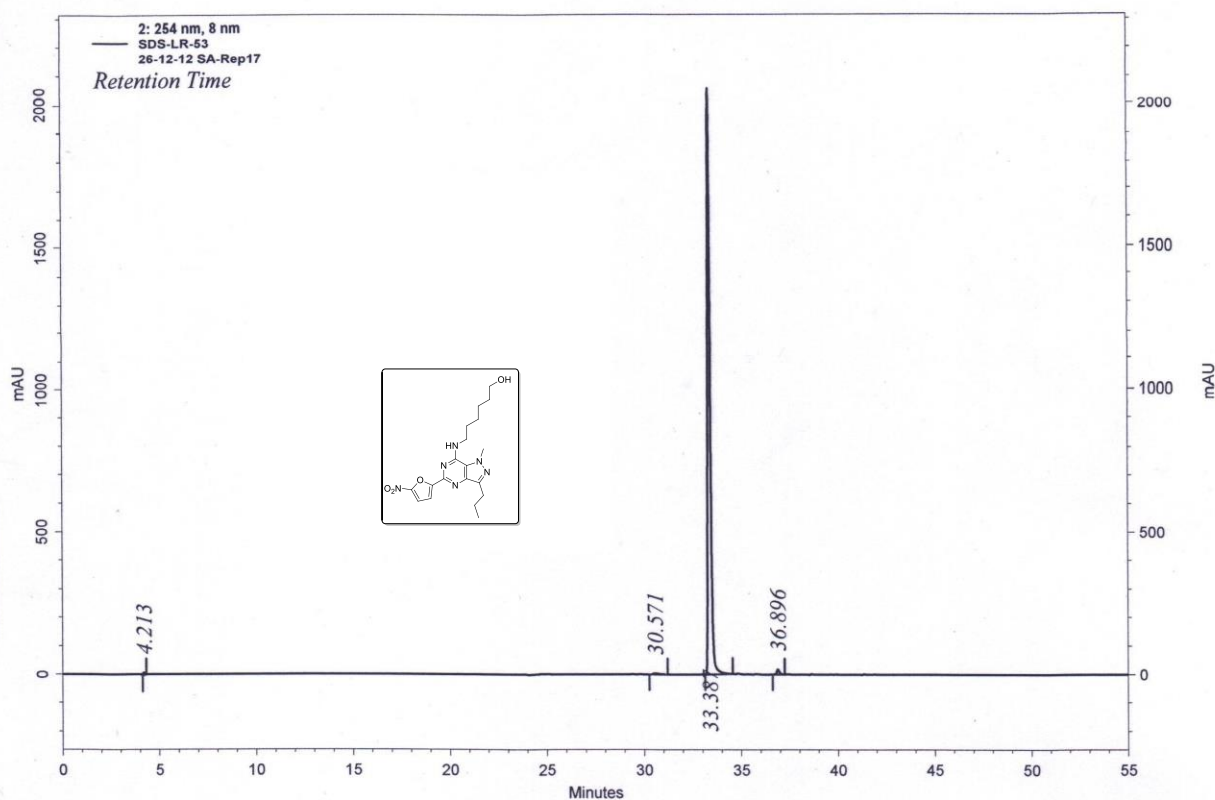

2: 254 nm, 8 nm

| Pk # | Retention Time | Area     | Area % | Height  | Height % |
|------|----------------|----------|--------|---------|----------|
| 1    | 4.213          | 61261    | 0.309  | 9508    | 0.456    |
| 2    | 30.571         | 83420    | 0.421  | 4194    | 0.201    |
| 3    | 33.387         | 19502693 | 98.432 | 2053945 | 98.493   |
| 4    | 36.896         | 166047   | 0.838  | 17730   | 0.850    |

|        |  |          |         |         |         |
|--------|--|----------|---------|---------|---------|
| Totals |  | 19813421 | 100.000 | 2085377 | 100.000 |
|--------|--|----------|---------|---------|---------|

# Compound (25)

<sup>1</sup>H NMR in CDCl<sub>3</sub>

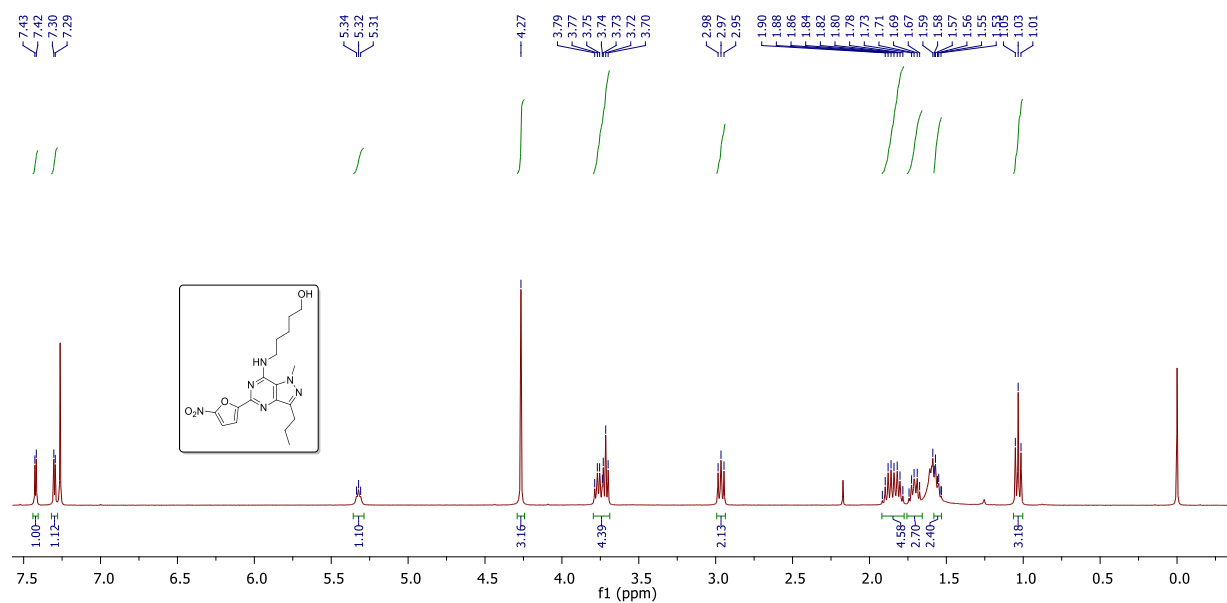

<sup>13</sup>C NMR in DMSO-d<sub>6</sub>

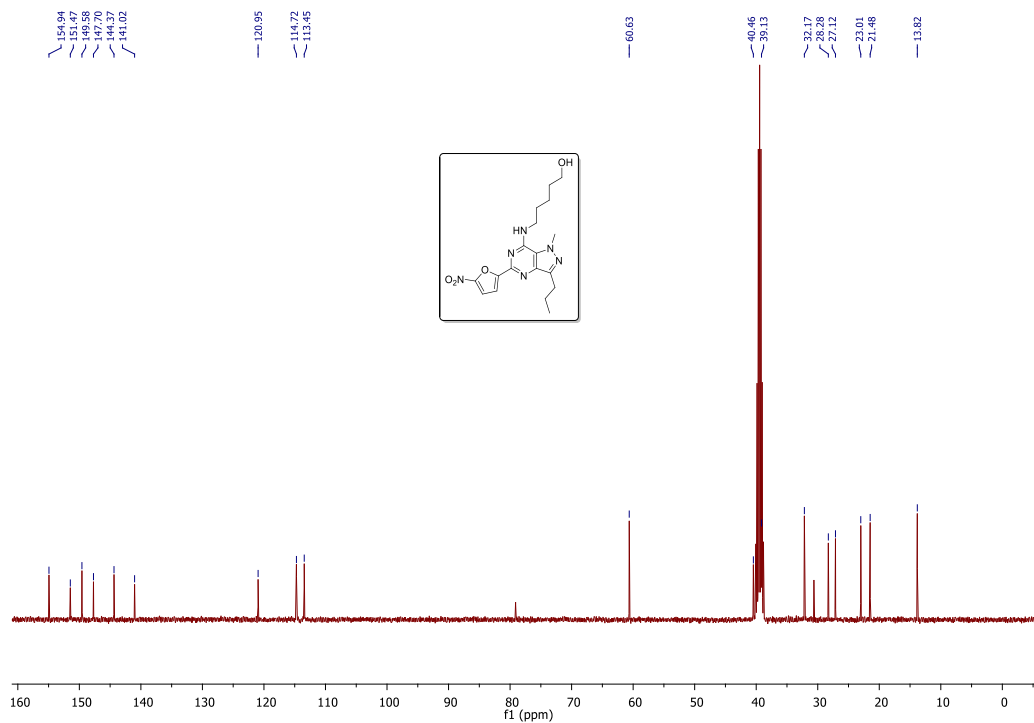

## HRMS

## Qualitative Compound Report

|                        |                   |               |                        |
|------------------------|-------------------|---------------|------------------------|
| Data File              | GLR-A-47.d        | Sample Name   | GLR-A-47               |
| Sample Type            | Sample            | Position      | Vial 4                 |
| Instrument Name        | Instrument 1      | User Name     |                        |
| Acq Method             | vishal_12-01-13.m | Acquired Time | 09-07-2013 PM 12:33:03 |
| IRM Calibration Status | Success           | DA Method     | daily_report.m         |
| Comment                |                   |               |                        |

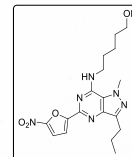

Sample Group  
Acquisition SW 6200 series TOF/6500 series  
Version Q-TOF B.05.01 (B5125)

Info.

## Compound Table

| Compound Label                                                       | RT    | Mass     | Formula                                                       | MFG Formula                                                   | MFG Diff (ppm) | DB Formula                                                    |
|----------------------------------------------------------------------|-------|----------|---------------------------------------------------------------|---------------------------------------------------------------|----------------|---------------------------------------------------------------|
| Cpd 7: C <sub>18</sub> H <sub>24</sub> N <sub>6</sub> O <sub>4</sub> | 0.193 | 388.1853 | C <sub>18</sub> H <sub>24</sub> N <sub>6</sub> O <sub>4</sub> | C <sub>18</sub> H <sub>24</sub> N <sub>6</sub> O <sub>4</sub> | 1.43           | C <sub>18</sub> H <sub>24</sub> N <sub>6</sub> O <sub>4</sub> |

| Compound Label                                                       | m/z      | RT    | Algorithm                 | Mass     |
|----------------------------------------------------------------------|----------|-------|---------------------------|----------|
| Cpd 7: C <sub>18</sub> H <sub>24</sub> N <sub>6</sub> O <sub>4</sub> | 389.1925 | 0.193 | Find by Molecular Feature | 388.1853 |

## MFE MS Spectrum

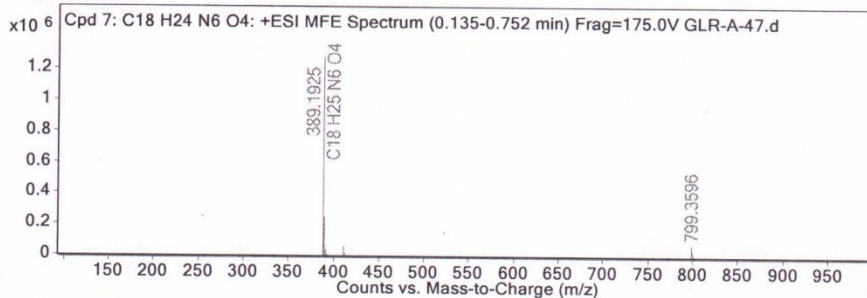

## MS Spectrum Peak List

| m/z      | z | Abund      | Formula                                                         | Ion      |
|----------|---|------------|-----------------------------------------------------------------|----------|
| 389.1925 | 1 | 1272528.63 | C <sub>18</sub> H <sub>25</sub> N <sub>6</sub> O <sub>4</sub>   | (M+H)+   |
| 390.1959 | 1 | 243920.28  | C <sub>18</sub> H <sub>25</sub> N <sub>6</sub> O <sub>4</sub>   | (M+H)+   |
| 391.1981 | 1 | 33209.2    | C <sub>18</sub> H <sub>25</sub> N <sub>6</sub> O <sub>4</sub>   | (M+H)+   |
| 392.2004 | 1 | 3821.87    | C <sub>18</sub> H <sub>25</sub> N <sub>6</sub> O <sub>4</sub>   | (M+H)+   |
| 411.1743 | 1 | 59634.92   | C <sub>18</sub> H <sub>24</sub> N <sub>6</sub> NaO <sub>4</sub> | (M+Na)+  |
| 412.1775 | 1 | 12861.71   | C <sub>18</sub> H <sub>24</sub> N <sub>6</sub> NaO <sub>4</sub> | (M+Na)+  |
| 413.1801 | 1 | 2281.33    | C <sub>18</sub> H <sub>24</sub> N <sub>6</sub> NaO <sub>4</sub> | (M+Na)+  |
| 799.3596 | 1 | 74392.88   |                                                                 | (2M+Na)+ |
| 800.3621 | 1 | 30664.33   |                                                                 | (2M+Na)+ |
| 801.3647 | 1 | 7088.35    |                                                                 | (2M+Na)+ |

## Predicted Isotope Match Table

| Isotope | m/z      | Calc m/z | Diff (ppm) | Abund % | Calc Abund % | Abund Sum % | Calc Abund Sum % |
|---------|----------|----------|------------|---------|--------------|-------------|------------------|
| 1       | 389.1925 | 389.1932 | 1.7        | 100     | 100          | 81.89       | 79.6             |
| 2       | 390.1959 | 390.196  | 0.11       | 19.17   | 22.1         | 15.7        | 17.59            |
| 3       | 391.1981 | 391.1984 | 0.7        | 2.61    | 3.15         | 2.14        | 2.51             |
| 4       | 392.2004 | 392.2008 | 0.99       | 0.3     | 0.34         | 0.25        | 0.27             |
| 5       | 393.2003 | 393.2031 | 7.07       | 0.03    | 0.03         | 0.03        | 0.02             |

--- End Of Report ---

# HPLC

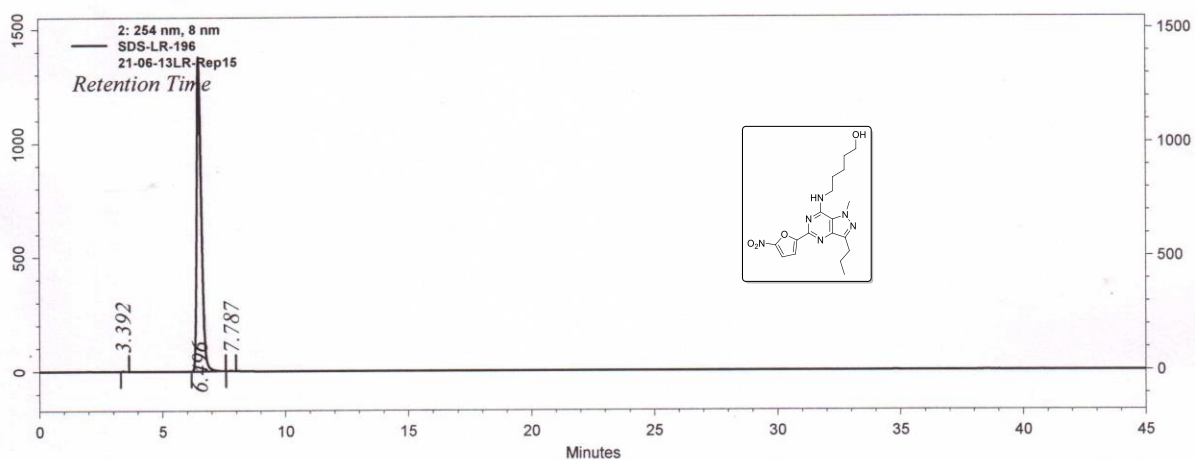

2: 254 nm, 8 nm

| Pk # | Retention Time | Area     | Area % | Height  | Height % |
|------|----------------|----------|--------|---------|----------|
| 1    | 3.392          | 10279    | 0.056  | 1484    | 0.107    |
| 2    | 6.496          | 18300925 | 99.867 | 1378069 | 99.799   |
| 3    | 7.787          | 14146    | 0.077  | 1290    | 0.093    |

|        |  |          |         |         |         |
|--------|--|----------|---------|---------|---------|
| Totals |  | 18325350 | 100.000 | 1380843 | 100.000 |
|--------|--|----------|---------|---------|---------|

# Compound (26)

<sup>1</sup>H NMR in CDCl<sub>3</sub>

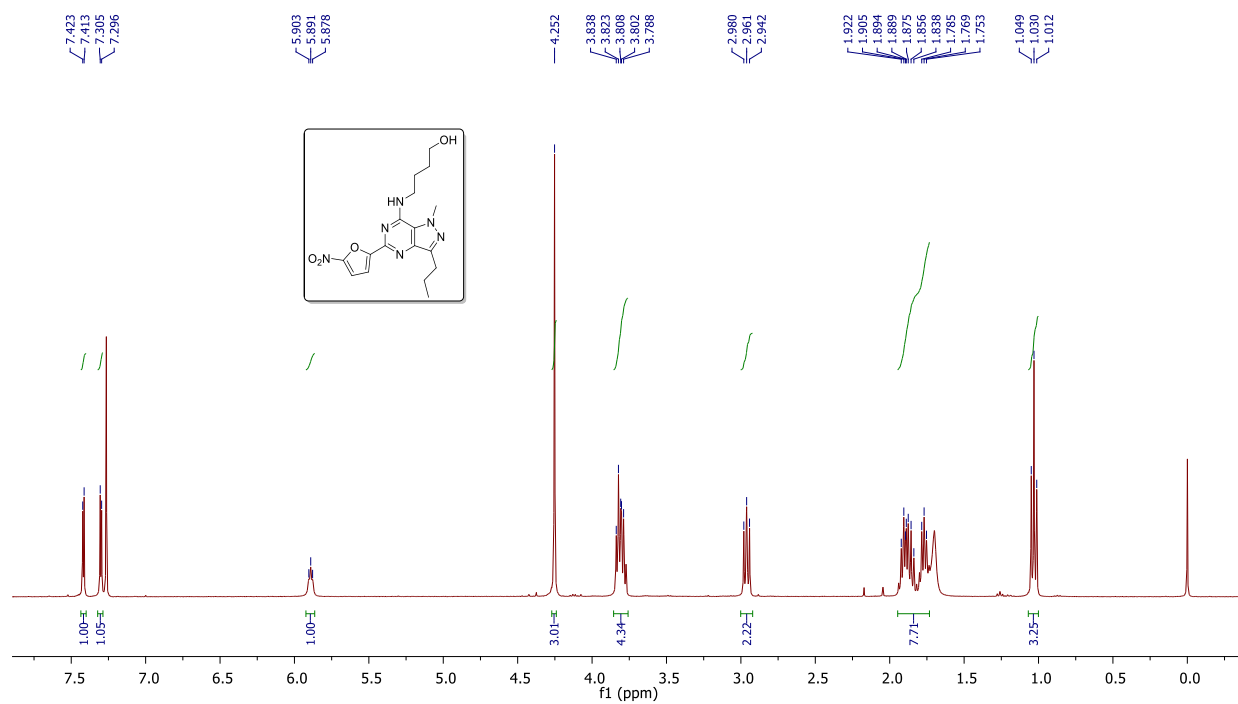

<sup>13</sup>C NMR in DMSO-d<sub>6</sub>

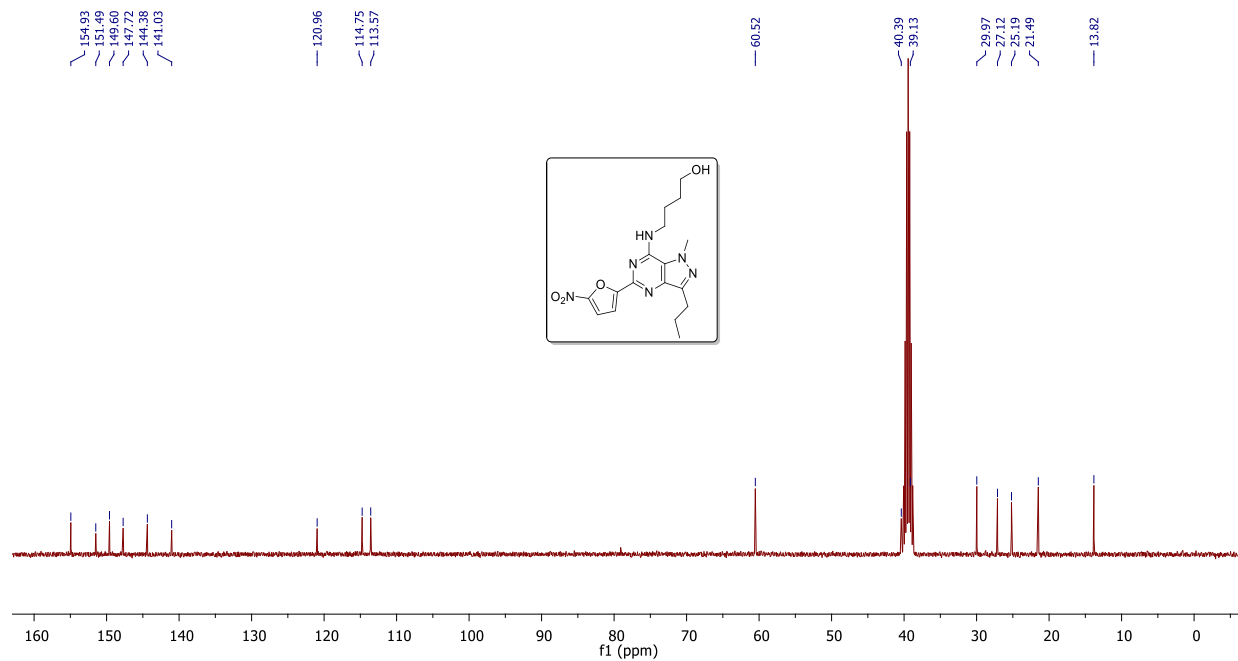



## HRMS

## Qualitative Compound Report

Data File GLR-A-51.d Sample Name GLR-A-51  
Sample Type Sample Position Vial 5  
Instrument Name Instrument 1 User Name  
Acq Method visha\_12-01-13.m Acquired Time 09-07-2013 PM 12:40:36  
IRM Calibration Status Success DA Method daily\_report.m  
Comment

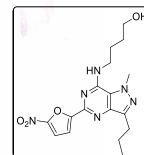

Sample Group Info.  
Acquisition SW 6200 series TOF/6500 series  
Version Q-TOF B.05.01 (B5125)

Compound Table

| Compound Label        | RT    | Mass   | Formula       | MFG Formula   | MFG Diff (ppm) | DB Formula    |
|-----------------------|-------|--------|---------------|---------------|----------------|---------------|
| Cpd 18: C17 H22 N6 O4 | 0.195 | 374.17 | C17 H22 N6 O4 | C17 H22 N6 O4 | 0.67           | C17 H22 N6 O4 |

| Compound Label        | m/z      | RT    | Algorithm                 | Mass   |
|-----------------------|----------|-------|---------------------------|--------|
| Cpd 18: C17 H22 N6 O4 | 375.1771 | 0.195 | Find by Molecular Feature | 374.17 |

MFE MS Spectrum

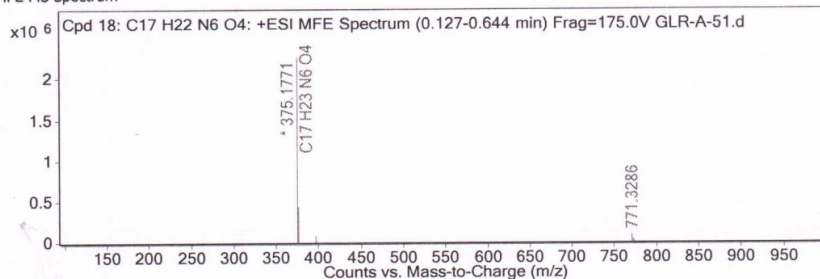

MS Spectrum Peak List

| m/z      | z | Abund     | Formula          | Ion      |
|----------|---|-----------|------------------|----------|
| 375.1771 | 1 | 2258091.5 | C17 H23 N6 O4    | (M+H)+   |
| 376.1806 | 1 | 433639.53 | C17 H23 N6 O4    | (M+H)+   |
| 377.1828 | 1 | 50726.54  | C17 H23 N6 O4    | (M+H)+   |
| 378.1847 | 1 | 4820.64   | C17 H23 N6 O4    | (M+H)+   |
| 397.159  | 1 | 72342.15  | C17 H22 N6 Na O4 | (M+Na)+  |
| 398.1619 | 1 | 15390.32  | C17 H22 N6 Na O4 | (M+Na)+  |
| 399.164  | 1 | 2235.92   | C17 H22 N6 Na O4 | (M+Na)+  |
| 771.3286 | 1 | 94778.48  |                  | (2M+Na)+ |
| 772.3307 | 1 | 40370.81  |                  | (2M+Na)+ |
| 773.3338 | 1 | 9694.06   |                  | (2M+Na)+ |

Predicted Isotope Match Table

| Isotope | m/z      | Calc m/z | Diff (ppm) | Abund % | Calc Abund % | Abund Sum % | Calc Abund Sum % |
|---------|----------|----------|------------|---------|--------------|-------------|------------------|
| 1       | 375.1771 | 375.1775 | 1.01       | 100     | 100          | 82.18       | 80.48            |
| 2       | 376.1806 | 376.1803 | -1.01      | 19.2    | 21           | 15.78       | 16.9             |
| 3       | 377.1828 | 377.1826 | -0.39      | 2.25    | 2.92         | 1.85        | 2.35             |
| 4       | 378.1847 | 378.185  | 0.83       | 0.21    | 0.31         | 0.18        | 0.25             |
| 5       | 379.1847 | 379.1873 | 7.07       | 0.02    | 0.03         | 0.02        | 0.02             |

--- End Of Report ---

# HPLC

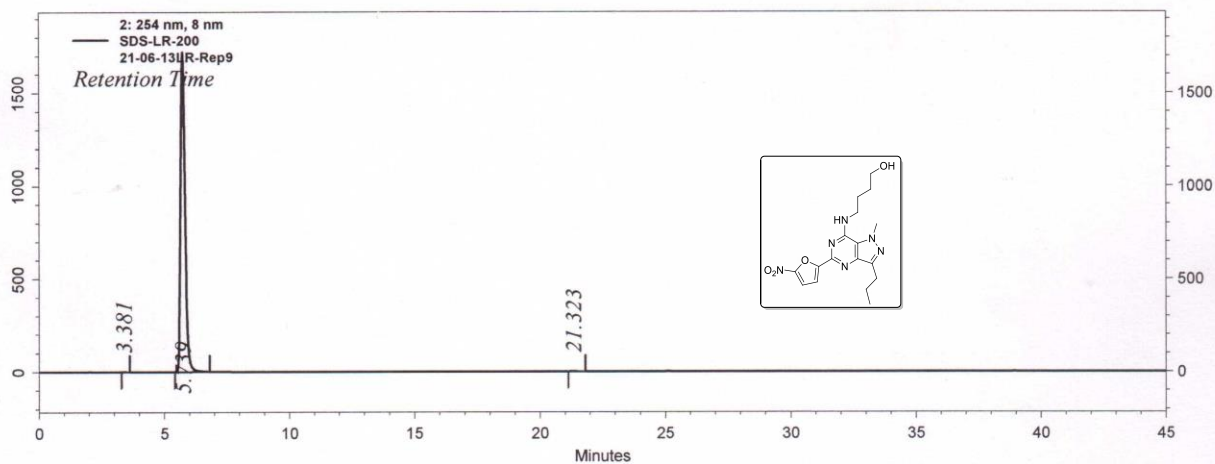

2: 254 nm, 8 nm

| Pk # | Retention Time | Area     | Area % | Height  | Height % |
|------|----------------|----------|--------|---------|----------|
| 1    | 3.381          | 10594    | 0.050  | 1547    | 0.090    |
| 2    | 5.739          | 21345161 | 99.844 | 1721036 | 99.815   |
| 3    | 21.323         | 22860    | 0.107  | 1641    | 0.095    |

|        |  |          |         |         |         |
|--------|--|----------|---------|---------|---------|
| Totals |  | 21378615 | 100.000 | 1724224 | 100.000 |
|--------|--|----------|---------|---------|---------|

# Compound (27)

<sup>1</sup>H NMR in CDCl<sub>3</sub>

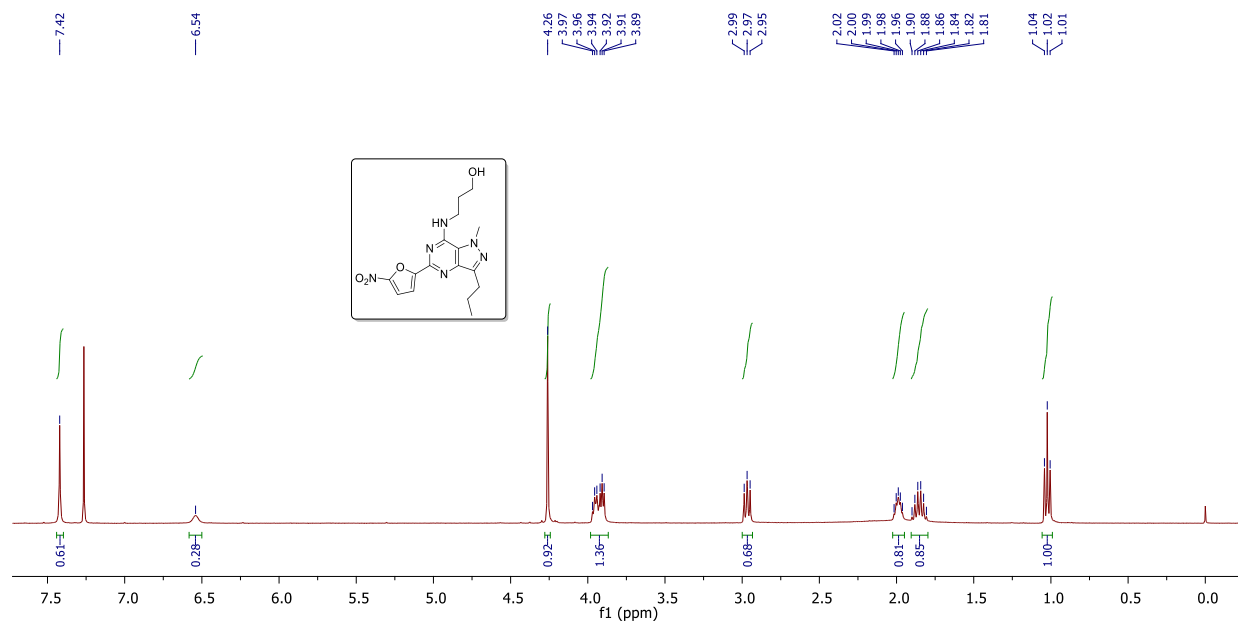

<sup>13</sup>C NMR in DMSO-d<sub>6</sub>

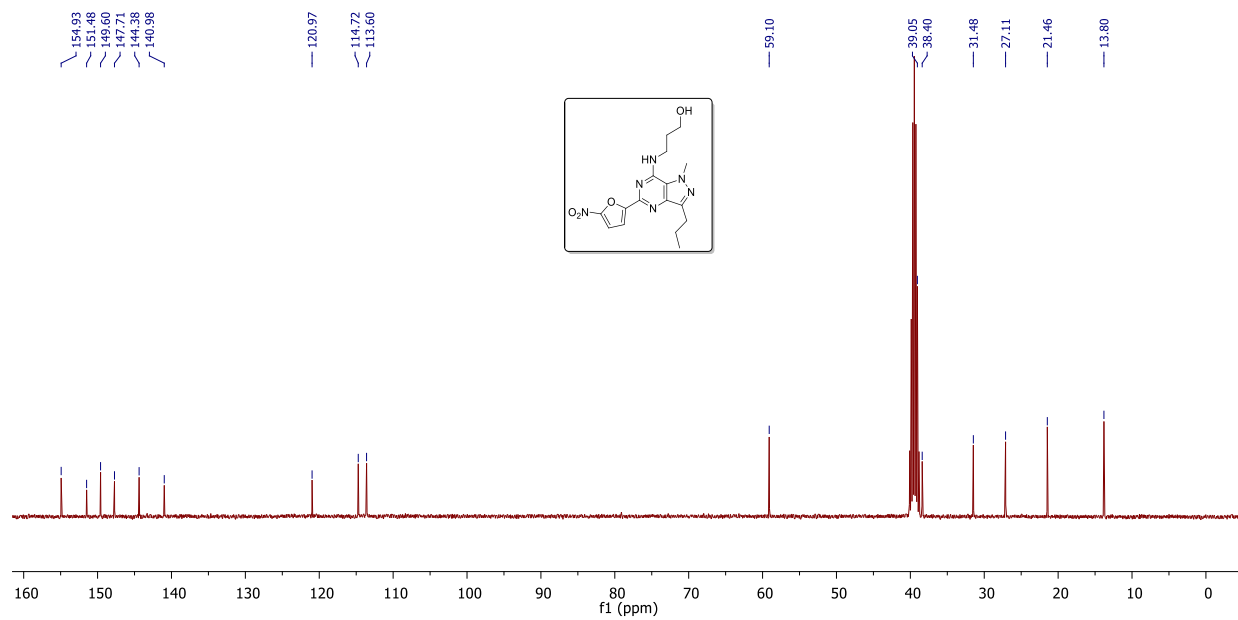

## Qualitative Compound Report

Data File GLR-A-50.d Sample Name GLR-A-50  
Sample Type Sample Position Vial 6  
Instrument Name Instrument 1 User Name  
Acq Method vishal\_12-01-13.m Acquired Time 09-07-2013 PM 12:42:09  
IRM Calibration Status Success DA Method daily\_report.m  
Comment

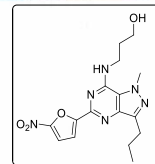

Sample Group Info.  
Acquisition SW 6200 series TOF/6500 series  
Version Q-TOF B.05.01 (B5125)

## Compound Table

| Compound Label       | RT    | Mass     | Formula       | MFG Formula   | MFG Diff (ppm) | DB Formula    |
|----------------------|-------|----------|---------------|---------------|----------------|---------------|
| Cpd 4: C16 H20 N6 O4 | 0.195 | 360.1547 | C16 H20 N6 O4 | C16 H20 N6 O4 | -0.33          | C16 H20 N6 O4 |

| Compound Label       | m/z     | RT    | Algorithm                 | Mass     |
|----------------------|---------|-------|---------------------------|----------|
| Cpd 4: C16 H20 N6 O4 | 361.162 | 0.195 | Find by Molecular Feature | 360.1547 |

## MFE MS Spectrum

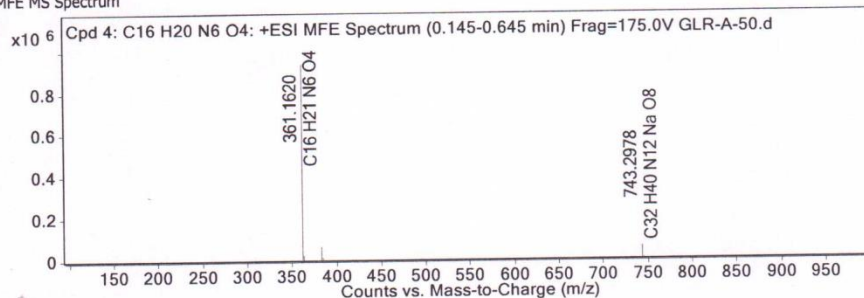

## MS Spectrum Peak List

| m/z      | z | Abund     | Formula           | Ion      |
|----------|---|-----------|-------------------|----------|
| 361.162  | 1 | 934604.69 | C16 H21 N6 O4     | (M+H)+   |
| 362.1648 | 1 | 161417.45 | C16 H21 N6 O4     | (M+H)+   |
| 363.1666 | 1 | 21325.7   | C16 H21 N6 O4     | (M+H)+   |
| 364.1688 | 1 | 2135.81   | C16 H21 N6 O4     | (M+H)+   |
| 383.1436 | 1 | 62944.37  | C16 H20 N6 Na O4  | (M+Na)+  |
| 384.1464 | 1 | 12541.51  | C16 H20 N6 Na O4  | (M+Na)+  |
| 385.1486 | 1 | 1701.56   | C16 H20 N6 Na O4  | (M+Na)+  |
| 743.2978 | 1 | 57376.84  | C32 H40 N12 Na O8 | (2M+Na)+ |
| 744.2997 | 1 | 21401.39  | C32 H40 N12 Na O8 | (2M+Na)+ |
| 745.3023 | 1 | 5249.12   | C32 H40 N12 Na O8 | (2M+Na)+ |

## Predicted Isotope Match Table

| Isotope | m/z      | Calc m/z | Diff (ppm) | Abund % | Calc Abund % | Abund Sum % | Calc Abund Sum % |
|---------|----------|----------|------------|---------|--------------|-------------|------------------|
| 1       | 361.162  | 361.1619 | -0.34      | 100     | 100          | 83.45       | 81.37            |
| 2       | 362.1648 | 362.1646 | -0.56      | 17.27   | 19.89        | 14.41       | 16.19            |
| 3       | 363.1666 | 363.1669 | 0.95       | 2.28    | 2.7          | 1.9         | 2.2              |
| 4       | 364.1688 | 364.1692 | 1.35       | 0.23    | 0.28         | 0.19        | 0.22             |
| 5       | 365.1623 | 365.1716 | 25.38      | 0.05    | 0.02         | 0.04        | 0.02             |

--- End Of Report ---

# HPLC

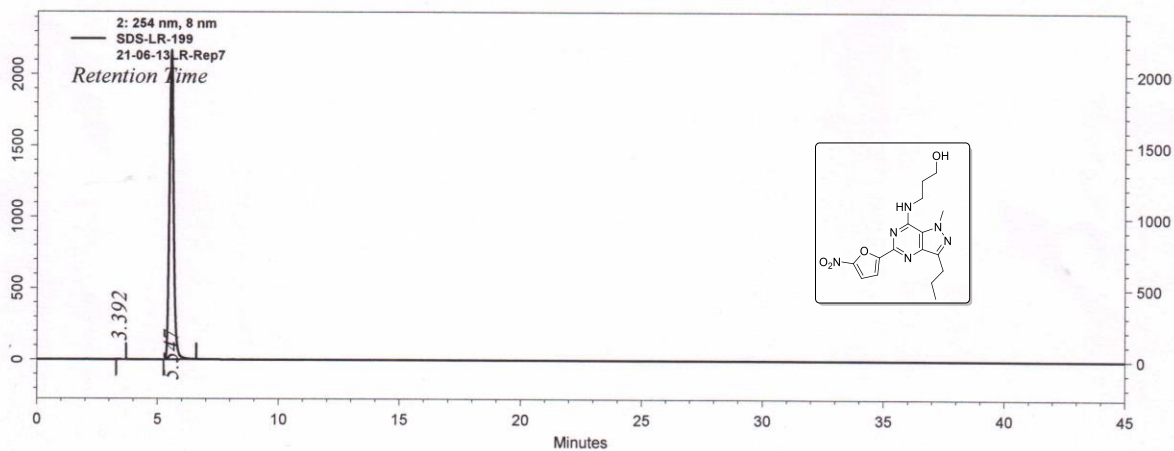

2: 254 nm, 8 nm

| Pk # | Retention Time | Area     | Area % | Height  | Height % |
|------|----------------|----------|--------|---------|----------|
| 1    | 3.392          | 11129    | 0.042  | 1577    | 0.073    |
| 2    | 5.547          | 26541690 | 99.958 | 2167589 | 99.927   |

|        |  |          |         |         |         |
|--------|--|----------|---------|---------|---------|
| Totals |  | 26552819 | 100.000 | 2169166 | 100.000 |
|--------|--|----------|---------|---------|---------|

## Compound (28)

$^1\text{H}$  NMR in DMSO- $d_6$

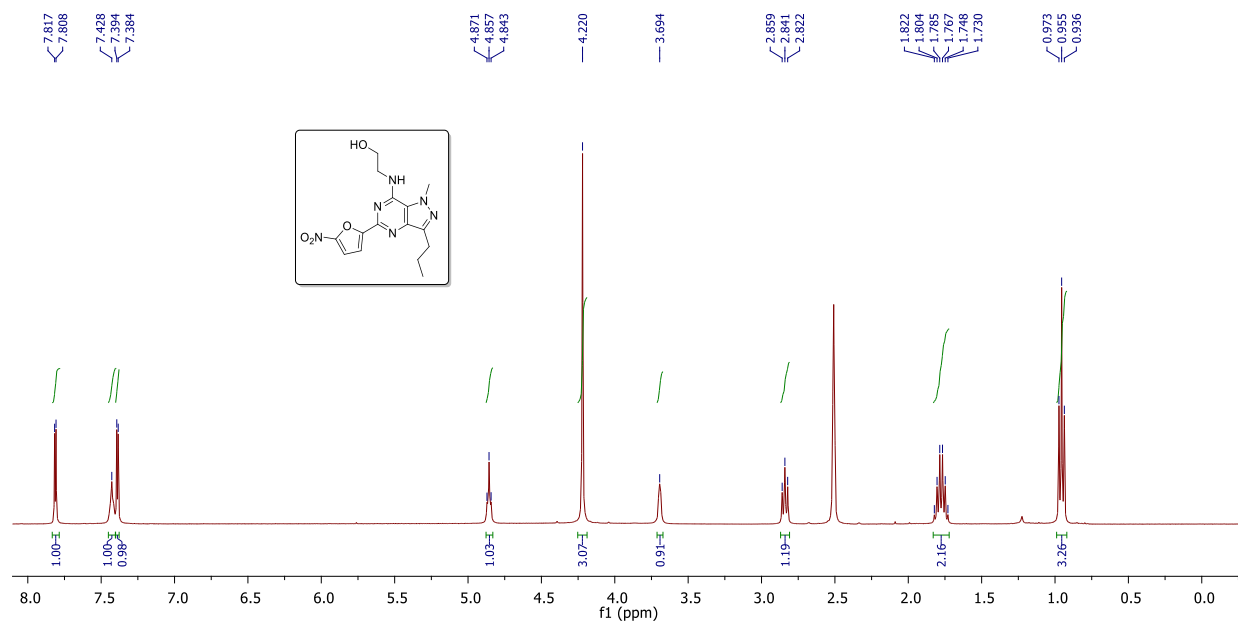

$^{13}\text{C}$  NMR in DMSO- $d_6$

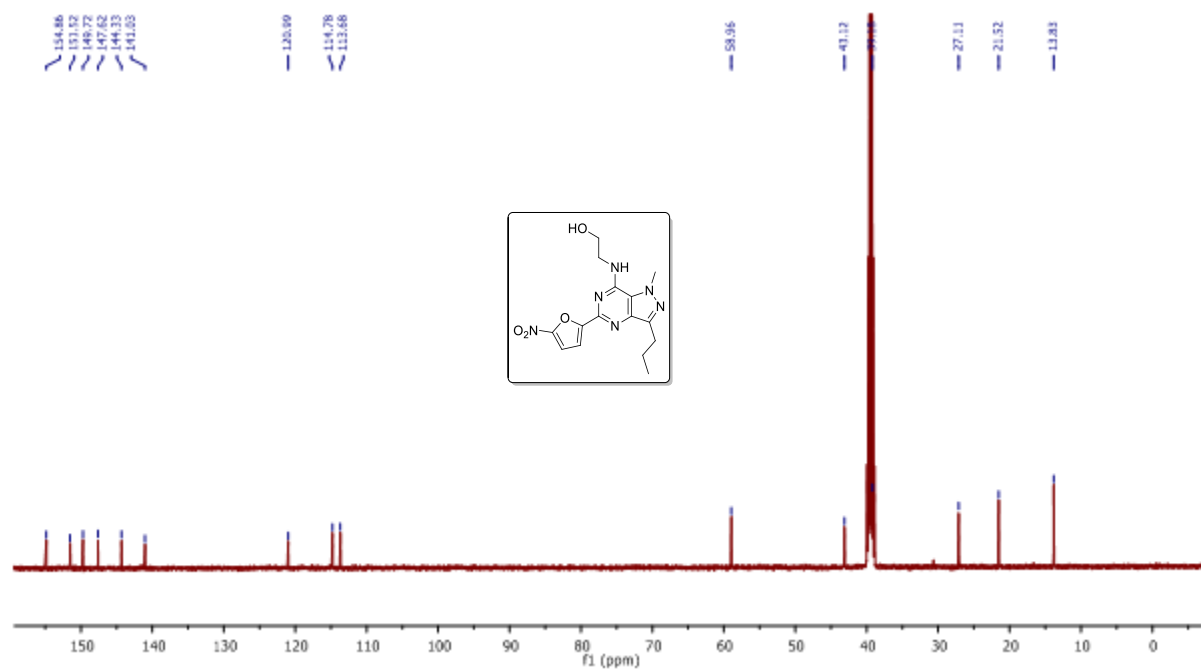



## Qualitative Compound Report

Data File GLR-1.d Sample Name GLR-1  
 Sample Type Sample Position Vial 14  
 Instrument Name Instrument 1 User Name  
 Acq Method vishal\_MS\_25072012.m Acquired Time 11/18/2012 12:58:04 PM  
 IRM Calibration Status Success DA Method as.m  
 Comment

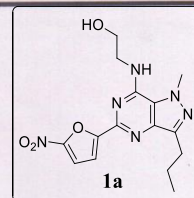

Sample Group Info.

## Compound Table

| Compound Label       | RT   | Mass      | Formula       | MFG Formula   | MFG Diff (ppm) | DB Formula    |
|----------------------|------|-----------|---------------|---------------|----------------|---------------|
| Cpd 5: C15 H18 N6 O4 | 0.17 | 346.13848 | C15 H18 N6 O4 | C15 H18 N6 O4 | 1.38           | C15 H18 N6 O4 |

| Compound Label       | m/z       | RT   | Algorithm                 | Mass      |
|----------------------|-----------|------|---------------------------|-----------|
| Cpd 5: C15 H18 N6 O4 | 347.14575 | 0.17 | Find by Molecular Feature | 346.13848 |

## MFE MS Spectrum

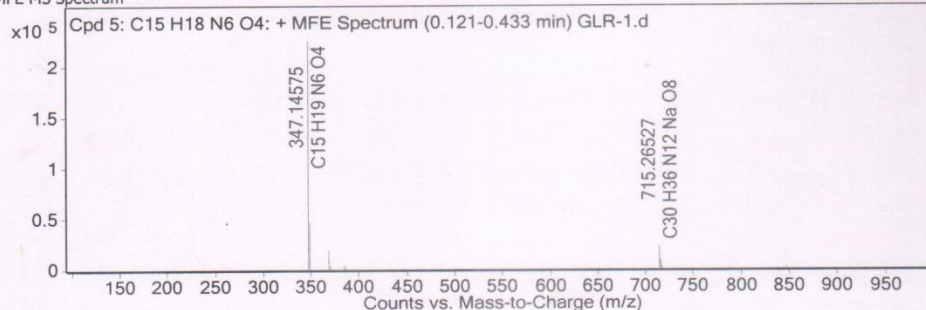

## MS Spectrum Peak List

| m/z       | z | Abund    | Formula           | Ion      |
|-----------|---|----------|-------------------|----------|
| 347.14575 | 1 | 225247.6 | C15 H19 N6 O4     | (M+H)+   |
| 348.14846 | 1 | 46517.4  | C15 H19 N6 O4     | (M+H)+   |
| 349.15045 | 1 | 5888.2   | C15 H19 N6 O4     | (M+H)+   |
| 369.12753 | 1 | 19064.4  | C15 H18 N6 Na O4  | (M+Na)+  |
| 370.13073 | 1 | 3624     | C15 H18 N6 Na O4  | (M+Na)+  |
| 371.13112 | 1 | 1591.5   | C15 H18 N6 Na O4  | (M+Na)+  |
| 385.10281 | 1 | 3357.7   | C15 H18 K N6 O4   | (M+K)+   |
| 715.26527 | 1 | 22254.8  | C30 H36 N12 Na O8 | (2M+Na)+ |
| 716.26916 | 1 | 8439.9   | C30 H36 N12 Na O8 | (2M+Na)+ |
| 717.27129 | 1 | 1908.5   | C30 H36 N12 Na O8 | (2M+Na)+ |

## Predicted Isotope Match Table

| Isotope | m/z       | Calc m/z  | Diff (ppm) | Abund % | Calc Abund % | Abund Sum % | Calc Abund Sum % |
|---------|-----------|-----------|------------|---------|--------------|-------------|------------------|
| 1       | 347.14575 | 347.14623 | 1.37       | 100     | 100          | 81.13       | 82.45            |
| 2       | 348.14846 | 348.14889 | 1.24       | 20.65   | 18.79        | 16.75       | 15.49            |
| 3       | 349.15045 | 349.15116 | 2.04       | 2.61    | 2.49         | 2.12        | 2.06             |

--- End Of Report ---

# HPLC

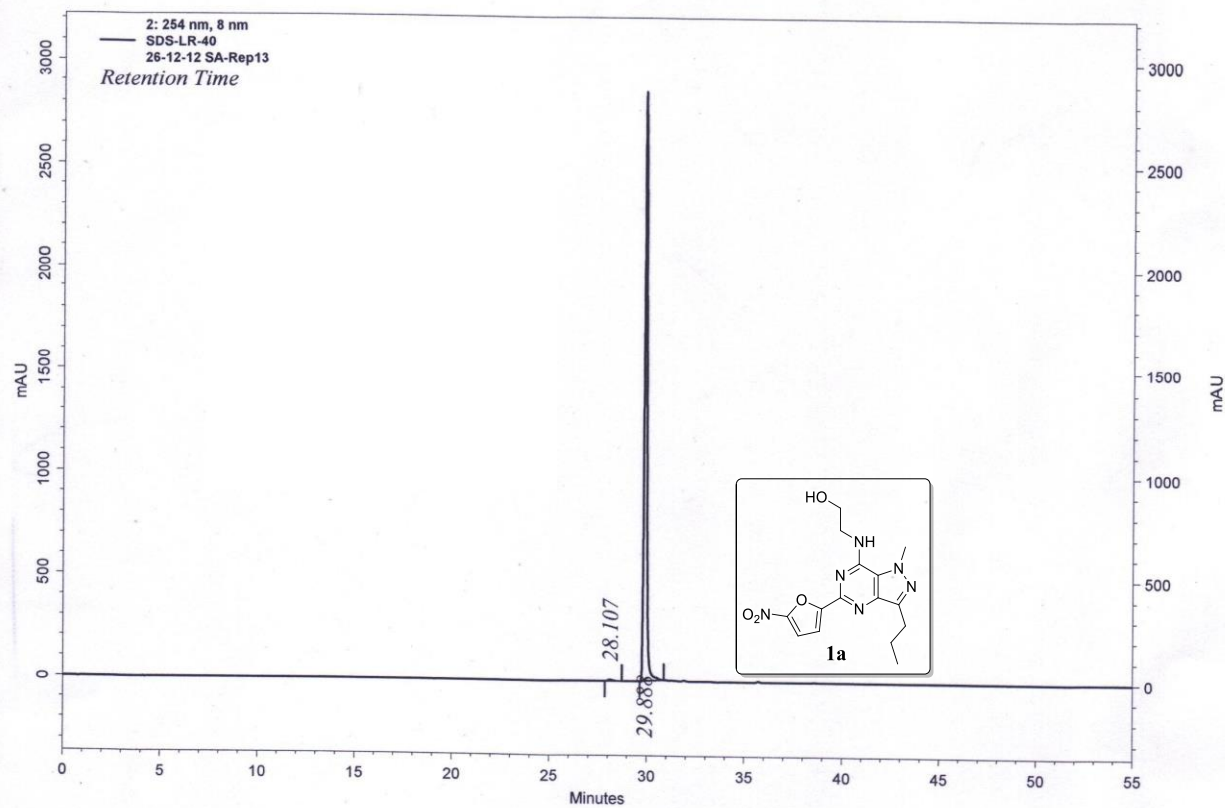

2: 254 nm, 8 nm

| Pk #   | Retention Time | Area     | Area %  | Height  | Height % |
|--------|----------------|----------|---------|---------|----------|
| 1      | 28.107         | 96951    | 0.354   | 6257    | 0.218    |
| 2      | 29.888         | 27268806 | 99.646  | 2860907 | 99.782   |
| Totals |                | 27365757 | 100.000 | 2867164 | 100.000  |

# Compound (29)

<sup>1</sup>H NMR in CDCl<sub>3</sub>

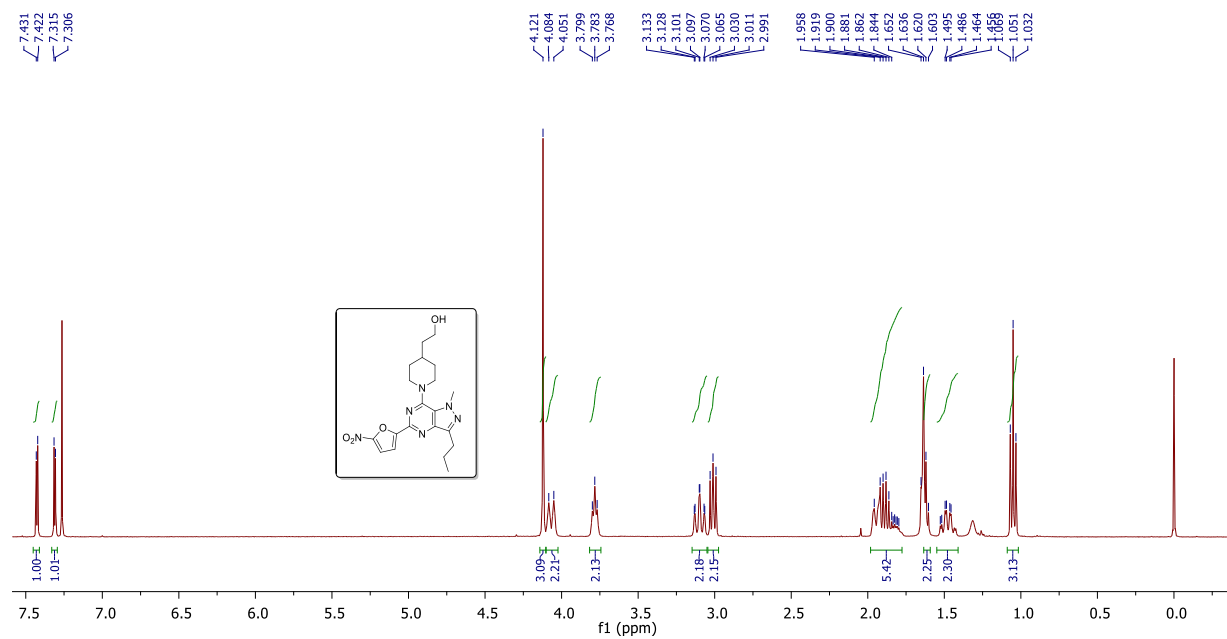

<sup>13</sup>C NMR in DMSO-d<sub>6</sub>

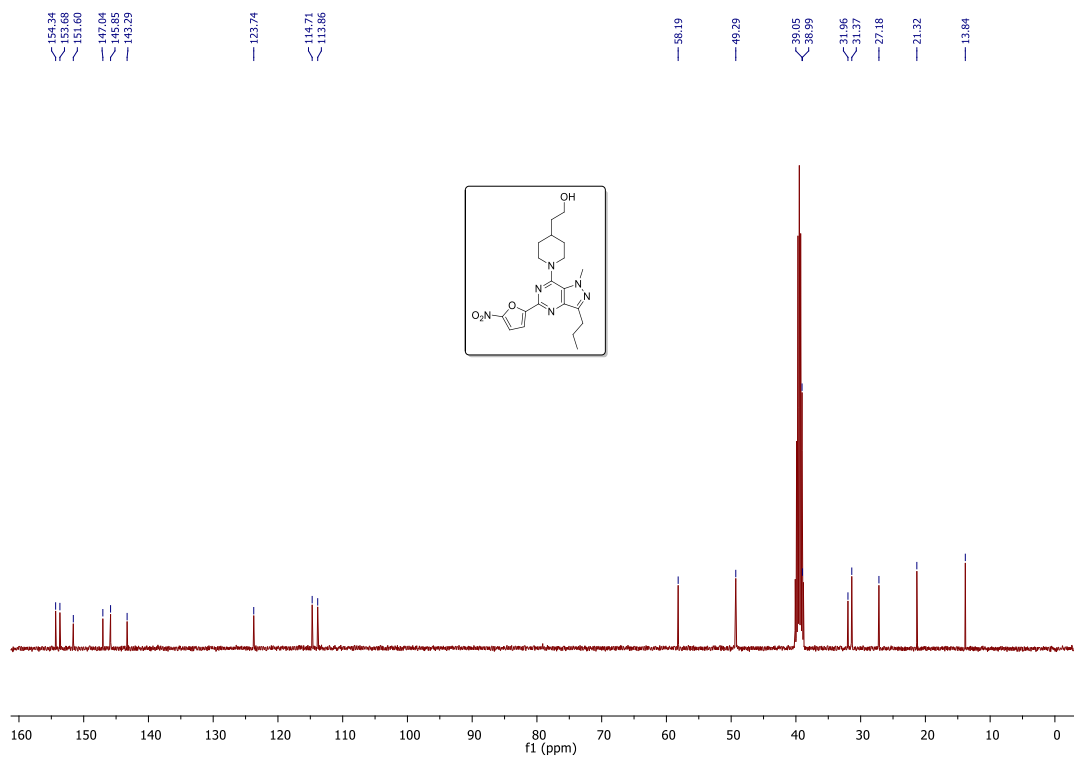

## Qualitative Compound Report

|                        |                   |               |                        |
|------------------------|-------------------|---------------|------------------------|
| Data File              | GLR-A-46.d        | Sample Name   | GLR-A-46               |
| Sample Type            | Sample            | Position      | Vial 7                 |
| Instrument Name        | Instrument 1      | User Name     |                        |
| Acq Method             | vishal_12-01-13.m | Acquired Time | 09-07-2013 PM 12:51:23 |
| IRM Calibration Status | Success           | DA Method     | daily_report.m         |
| Comment                |                   |               |                        |

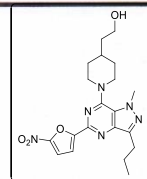

|                |                             |
|----------------|-----------------------------|
| Sample Group   | Info.                       |
| Acquisition SW | 6200 series TOF/6500 series |
| Version        | Q-TOF B.05.01 (B5125)       |

## Compound Table

| Compound Label                                                        | RT    | Mass     | Formula                                                       | MFG Formula                                                   | MFG Diff (ppm) | DB Formula                                                    |
|-----------------------------------------------------------------------|-------|----------|---------------------------------------------------------------|---------------------------------------------------------------|----------------|---------------------------------------------------------------|
| Cpd 11: C <sub>20</sub> H <sub>26</sub> N <sub>6</sub> O <sub>4</sub> | 0.196 | 414.2011 | C <sub>20</sub> H <sub>26</sub> N <sub>6</sub> O <sub>4</sub> | C <sub>20</sub> H <sub>26</sub> N <sub>6</sub> O <sub>4</sub> | 1.06           | C <sub>20</sub> H <sub>26</sub> N <sub>6</sub> O <sub>4</sub> |

| Compound Label                                                        | m/z      | RT    | Algorithm                 | Mass     |
|-----------------------------------------------------------------------|----------|-------|---------------------------|----------|
| Cpd 11: C <sub>20</sub> H <sub>26</sub> N <sub>6</sub> O <sub>4</sub> | 415.2083 | 0.196 | Find by Molecular Feature | 414.2011 |

## MFE MS Spectrum

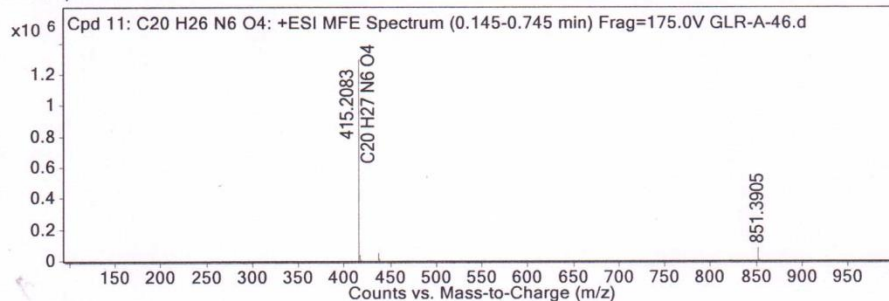

## MS Spectrum Peak List

| m/z      | z | Abund      | Formula                                                          | Ion                  |
|----------|---|------------|------------------------------------------------------------------|----------------------|
| 415.2083 | 1 | 1292987.38 | C <sub>20</sub> H <sub>27</sub> N <sub>6</sub> O <sub>4</sub>    | (M+H) <sup>+</sup>   |
| 416.2117 | 1 | 291293.09  | C <sub>20</sub> H <sub>27</sub> N <sub>6</sub> O <sub>4</sub>    | (M+H) <sup>+</sup>   |
| 417.2138 | 1 | 39021.78   | C <sub>20</sub> H <sub>27</sub> N <sub>6</sub> O <sub>4</sub>    | (M+H) <sup>+</sup>   |
| 418.2169 | 1 | 4733.37    | C <sub>20</sub> H <sub>27</sub> N <sub>6</sub> O <sub>4</sub>    | (M+H) <sup>+</sup>   |
| 437.1901 | 1 | 50145.08   | C <sub>20</sub> H <sub>26</sub> N <sub>6</sub> Na O <sub>4</sub> | (M+Na) <sup>+</sup>  |
| 438.1928 | 1 | 11900.2    | C <sub>20</sub> H <sub>26</sub> N <sub>6</sub> Na O <sub>4</sub> | (M+Na) <sup>+</sup>  |
| 439.1943 | 1 | 2186.7     | C <sub>20</sub> H <sub>26</sub> N <sub>6</sub> Na O <sub>4</sub> | (M+Na) <sup>+</sup>  |
| 851.3905 | 1 | 77696.91   |                                                                  | (2M+Na) <sup>+</sup> |
| 852.3931 | 1 | 37551.07   |                                                                  | (2M+Na) <sup>+</sup> |
| 853.3957 | 1 | 9755.46    |                                                                  | (2M+Na) <sup>+</sup> |

## Predicted Isotope Match Table

| Isotope | m/z      | Calc m/z | Diff (ppm) | Abund % | Calc Abund % | Abund Sum % | Calc Abund Sum % |
|---------|----------|----------|------------|---------|--------------|-------------|------------------|
| 1       | 415.2083 | 415.2088 | 1.32       | 100     | 100          | 79.4        | 77.89            |
| 2       | 416.2117 | 416.2117 | -0.05      | 22.53   | 24.29        | 17.89       | 18.92            |
| 3       | 417.2138 | 417.2141 | 0.76       | 3.02    | 3.65         | 2.4         | 2.84             |
| 4       | 418.2169 | 418.2166 | -0.69      | 0.37    | 0.41         | 0.29        | 0.32             |
| 5       | 419.2203 | 419.219  | -3.1       | 0.03    | 0.04         | 0.02        | 0.03             |

--- End Of Report ---

## HPLC

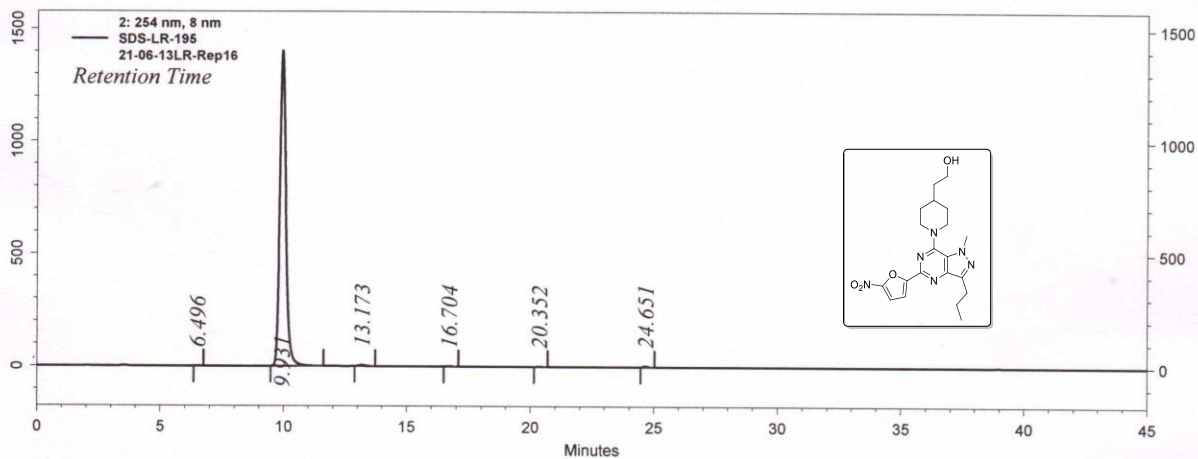

2: 254 nm, 8 nm

| Pk # | Retention Time | Area     | Area % | Height  | Height % |
|------|----------------|----------|--------|---------|----------|
| 1    | 6.496          | 10741    | 0.044  | 967     | 0.068    |
| 2    | 9.931          | 24200097 | 99.287 | 1403390 | 99.168   |
| 3    | 13.173         | 85912    | 0.352  | 4511    | 0.319    |
| 4    | 16.704         | 11043    | 0.045  | 671     | 0.047    |
| 5    | 20.352         | 16214    | 0.067  | 1096    | 0.077    |
| 6    | 24.651         | 49770    | 0.204  | 4535    | 0.320    |

|        |  |          |         |         |         |
|--------|--|----------|---------|---------|---------|
| Totals |  | 24373777 | 100.000 | 1415170 | 100.000 |
|--------|--|----------|---------|---------|---------|



# Compound (30)

<sup>1</sup>H NMR in CDCl<sub>3</sub>

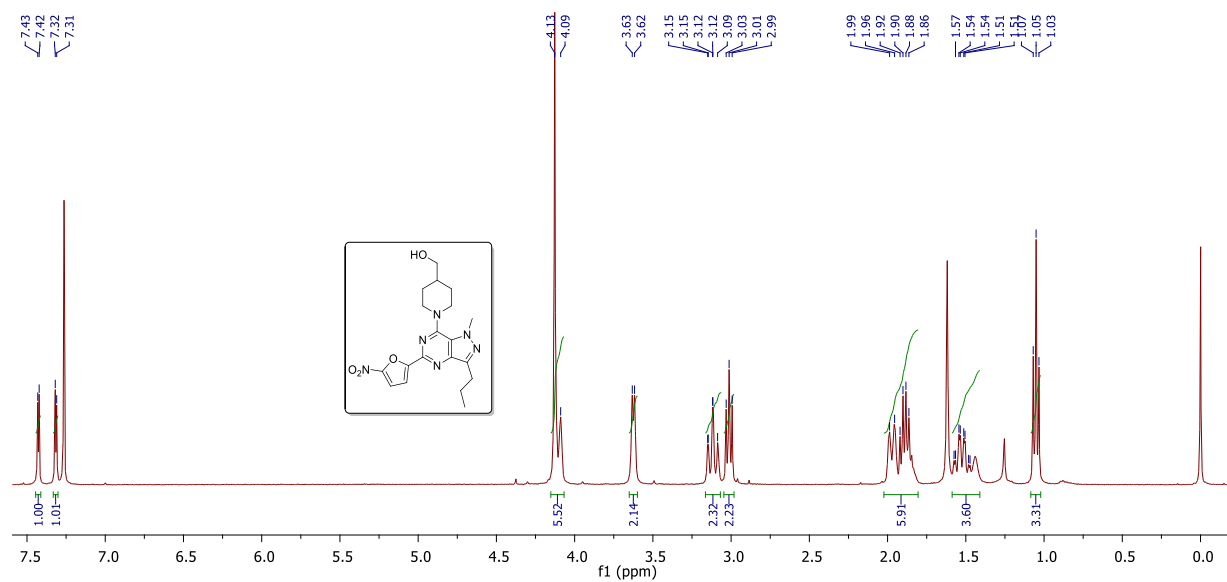

<sup>13</sup>C NMR in DMSO-d<sub>6</sub>

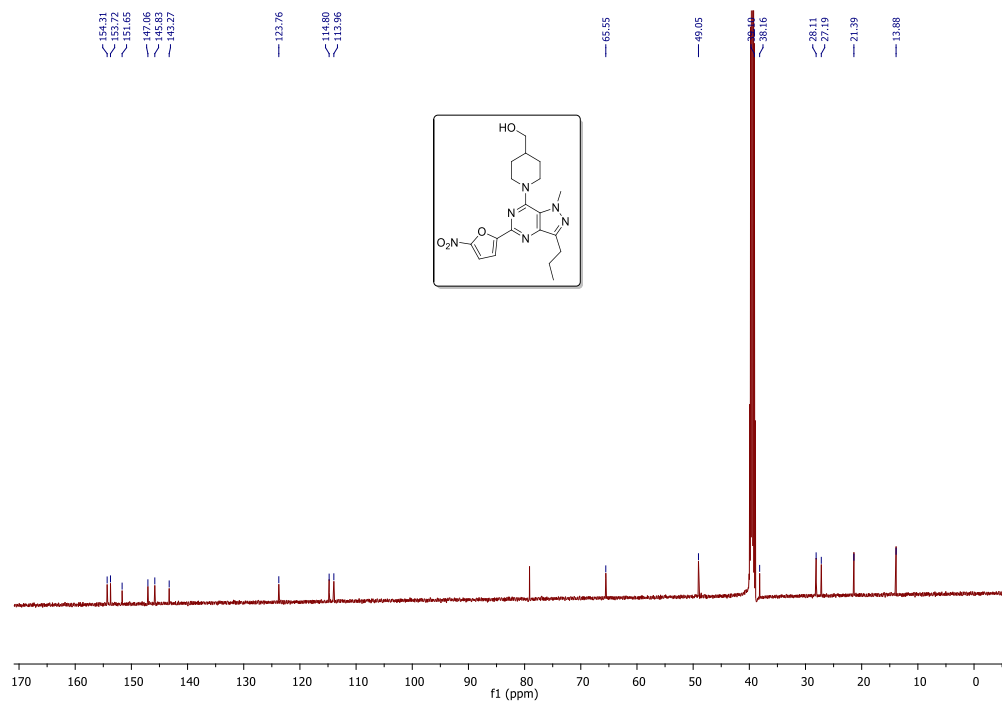



## HRMS

## Qualitative Compound Report

**Data File** GLR-4-36.d  
**Sample Type** Sample  
**Instrument Name** Instrument 1  
**Acq Method** vishal\_MS\_25072012.m  
**IRM Calibration Status** Success  
**Comment**  
**Sample Name** GLR-4-36  
**Position** Vial 7  
**User Name**  
**Acquired Time** 11/19/2012 12:50:56 PM  
**DA Method** as.m

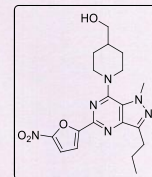

**Sample Group** Info.

## Compound Table

| Compound Label                                                       | RT    | Mass      | Formula                                                       | MFG Formula                                                   | MFG Diff (ppm) | DB Formula                                                    |
|----------------------------------------------------------------------|-------|-----------|---------------------------------------------------------------|---------------------------------------------------------------|----------------|---------------------------------------------------------------|
| Cpd 6: C <sub>19</sub> H <sub>24</sub> N <sub>6</sub> O <sub>4</sub> | 0.172 | 400.18506 | C <sub>19</sub> H <sub>24</sub> N <sub>6</sub> O <sub>4</sub> | C <sub>19</sub> H <sub>24</sub> N <sub>6</sub> O <sub>4</sub> | 2.1            | C <sub>19</sub> H <sub>24</sub> N <sub>6</sub> O <sub>4</sub> |

| Compound Label                                                       | m/z       | RT    | Algorithm                 | Mass      |
|----------------------------------------------------------------------|-----------|-------|---------------------------|-----------|
| Cpd 6: C <sub>19</sub> H <sub>24</sub> N <sub>6</sub> O <sub>4</sub> | 401.19234 | 0.172 | Find by Molecular Feature | 400.18506 |

## MFE MS Spectrum

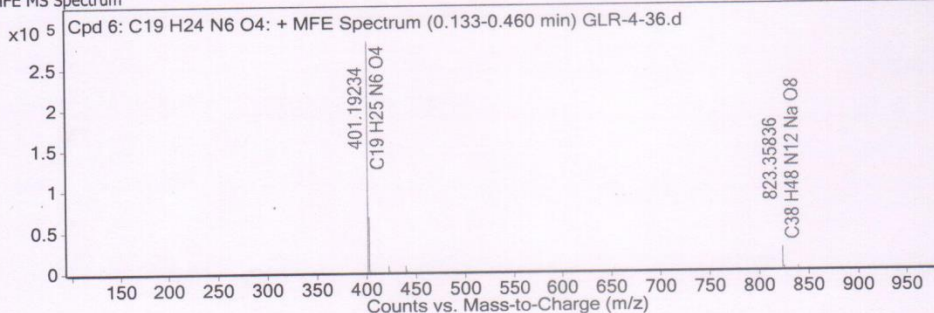

## MS Spectrum Peak List

| m/z       | z | Abund    | Formula                                                           | Ion                  |
|-----------|---|----------|-------------------------------------------------------------------|----------------------|
| 401.19234 | 1 | 282970.2 | C <sub>19</sub> H <sub>25</sub> N <sub>6</sub> O <sub>4</sub>     | (M+H) <sup>+</sup>   |
| 402.19526 | 1 | 67367.8  | C <sub>19</sub> H <sub>25</sub> N <sub>6</sub> O <sub>4</sub>     | (M+H) <sup>+</sup>   |
| 403.19781 | 1 | 11081.3  | C <sub>19</sub> H <sub>25</sub> N <sub>6</sub> O <sub>4</sub>     | (M+H) <sup>+</sup>   |
| 423.17484 | 1 | 7723.5   | C <sub>19</sub> H <sub>24</sub> N <sub>6</sub> Na O <sub>4</sub>  | (M+Na) <sup>+</sup>  |
| 439.14864 | 1 | 7726.5   | C <sub>19</sub> H <sub>24</sub> K N <sub>6</sub> O <sub>4</sub>   | (M+K) <sup>+</sup>   |
| 440.15073 | 1 | 2042     | C <sub>19</sub> H <sub>24</sub> K N <sub>6</sub> O <sub>4</sub>   | (M+K) <sup>+</sup>   |
| 823.35836 | 1 | 26678.9  | C <sub>38</sub> H <sub>48</sub> N <sub>12</sub> Na O <sub>8</sub> | (2M+Na) <sup>+</sup> |
| 824.36126 | 1 | 12483.3  | C <sub>38</sub> H <sub>48</sub> N <sub>12</sub> Na O <sub>8</sub> | (2M+Na) <sup>+</sup> |
| 825.36353 | 1 | 3587.6   | C <sub>38</sub> H <sub>48</sub> N <sub>12</sub> Na O <sub>8</sub> | (2M+Na) <sup>+</sup> |
| 839.33337 | 1 | 2868.5   | C <sub>38</sub> H <sub>48</sub> K N <sub>12</sub> O <sub>8</sub>  | (2M+K) <sup>+</sup>  |

## Predicted Isotope Match Table

| Isotope | m/z       | Calc m/z  | Diff (ppm) | Abund % | Calc Abund % | Abund Sum % | Calc Abund Sum % |
|---------|-----------|-----------|------------|---------|--------------|-------------|------------------|
| 1       | 401.19234 | 401.19318 | 2.1        | 100     | 100          | 77.93       | 78.77            |
| 2       | 402.19526 | 402.19598 | 1.78       | 23.81   | 23.18        | 18.55       | 18.26            |
| 3       | 403.19781 | 403.19843 | 1.54       | 3.92    | 3.39         | 3.05        | 2.67             |
| 4       | 404.2001  | 404.20084 | 1.84       | 0.59    | 0.37         | 0.46        | 0.29             |

--- End Of Report ---

# HPLC

## <Chromatogram>

mAU

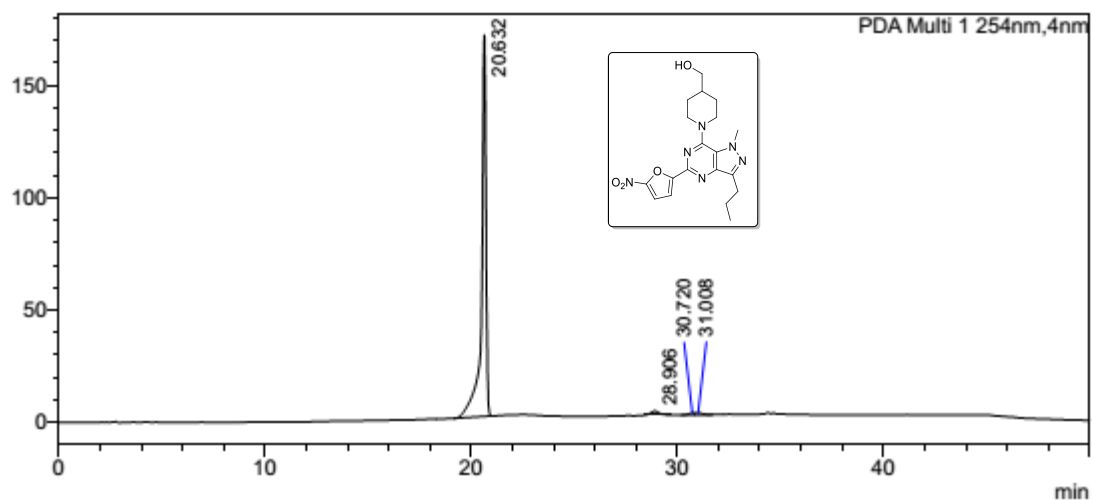

## <Peak Table>

PDA Ch1 254nm

| Peak# | Name | Ret. Time | Area    | Height | Area%   | Height% |
|-------|------|-----------|---------|--------|---------|---------|
| 1     |      | 20.632    | 2551608 | 169677 | 96.403  | 97.966  |
| 2     |      | 28.906    | 56197   | 1832   | 2.123   | 1.058   |
| 3     |      | 30.720    | 15467   | 789    | 0.584   | 0.455   |
| 4     |      | 31.008    | 23540   | 902    | 0.889   | 0.521   |
| Total |      |           | 2646813 | 173199 | 100.000 | 100.000 |

# Compound (31)

<sup>1</sup>H NMR in CDCl<sub>3</sub>

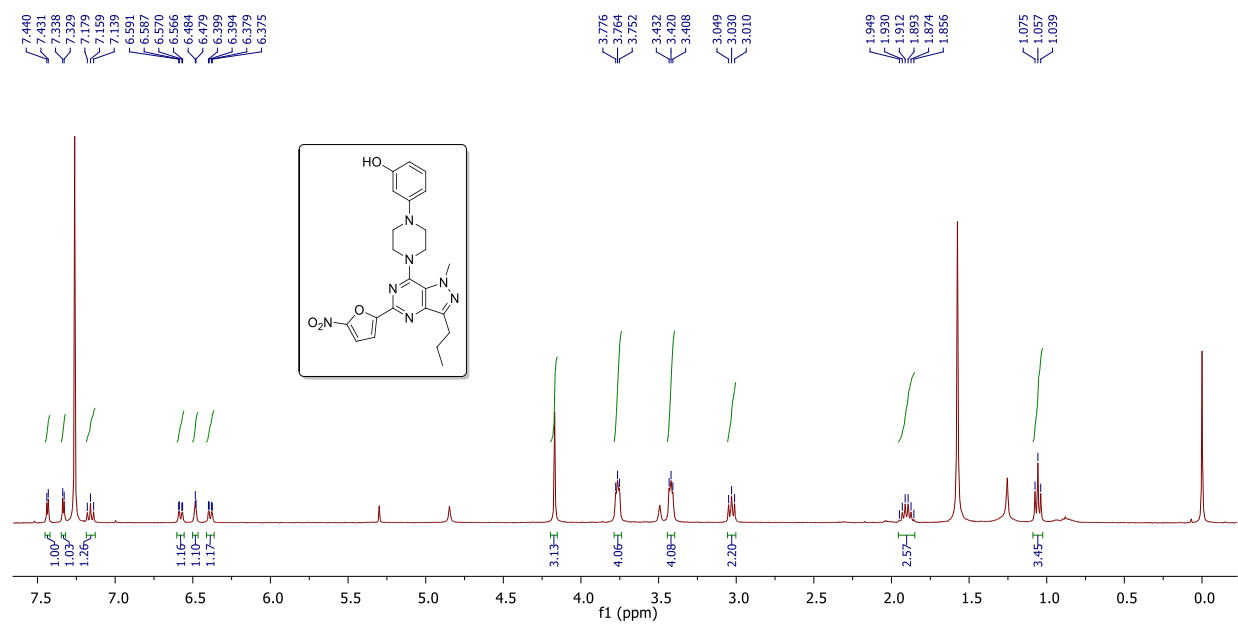

<sup>13</sup>C NMR in DMSO-d<sub>6</sub>

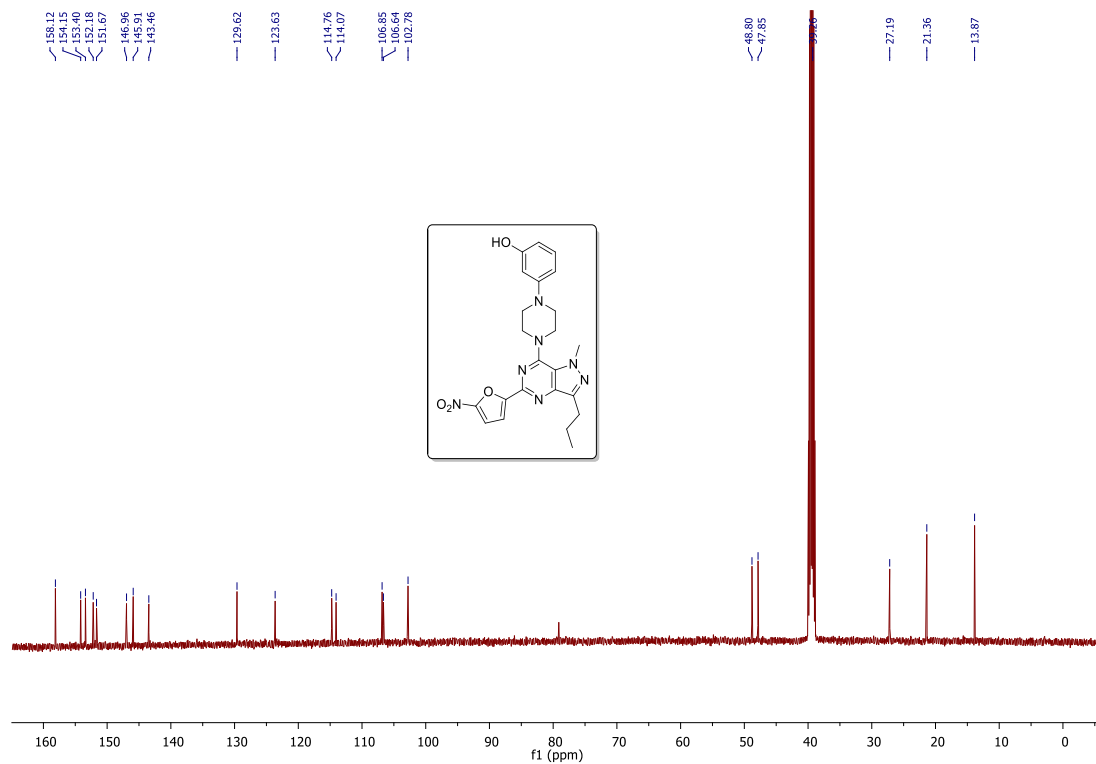

# HRMS

## Qualitative Compound Report

Data File: GLR-4-38.d  
Sample Type: Sample  
Instrument Name: Instrument 1  
Acq Method: vishal\_MS\_25072012.m  
IRM Calibration Status: Success  
Comment:

Sample Name: GLR-4-38  
Position: Vial 14  
User Name:  
Acquired Time: 11/19/2012 1:26:20 PM  
DA Method: as.m

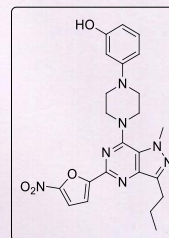

Sample Group: Info.

### Compound Table

| Compound Label       | RT    | Mass      | Formula       | MFG Formula   | MFG Diff (ppm) | DB Formula    |
|----------------------|-------|-----------|---------------|---------------|----------------|---------------|
| Cpd 9: C23 H25 N7 O4 | 0.172 | 463.19602 | C23 H25 N7 O4 | C23 H25 N7 O4 | 1.68           | C23 H25 N7 O4 |

| Compound Label       | m/z       | RT    | Algorithm                 | Mass      |
|----------------------|-----------|-------|---------------------------|-----------|
| Cpd 9: C23 H25 N7 O4 | 464.20331 | 0.172 | Find by Molecular Feature | 463.19602 |

### MFE MS Spectrum

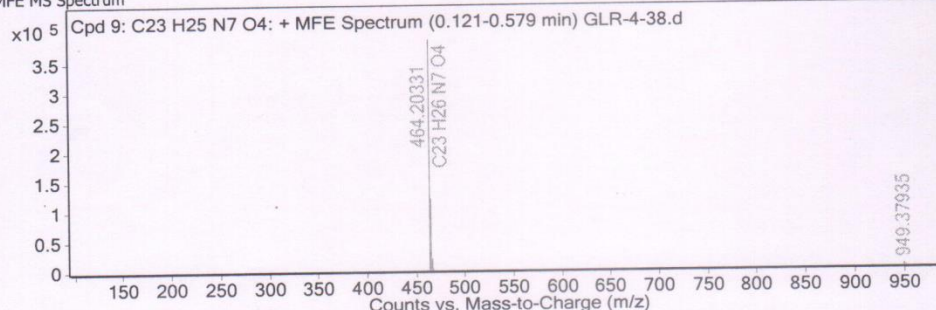

### MS Spectrum Peak List

| m/z       | z | Abund    | Formula       | Ion      |
|-----------|---|----------|---------------|----------|
| 464.20331 | 1 | 388142.2 | C23 H26 N7 O4 | (M+H)+   |
| 465.20582 | 1 | 120954.3 | C23 H26 N7 O4 | (M+H)+   |
| 466.20898 | 1 | 19834    | C23 H26 N7 O4 | (M+H)+   |
| 467.21078 | 1 | 2581.2   | C23 H26 N7 O4 | (M+H)+   |
| 949.37935 | 1 | 4499.6   |               | (2M+Na)+ |
| 950.38136 | 1 | 3277.5   |               | (2M+Na)+ |
| 951.38441 | 1 | 1005.2   |               | (2M+Na)+ |

### Predicted Isotope Match Table

| Isotope | m/z       | Calc m/z  | Diff (ppm) | Abund % | Calc Abund % | Abund Sum % | Calc Abund Sum % |
|---------|-----------|-----------|------------|---------|--------------|-------------|------------------|
| 1       | 464.20331 | 464.20408 | 1.66       | 100     | 100          | 73.03       | 75.18            |
| 2       | 465.20582 | 465.20689 | 2.3        | 31.16   | 27.88        | 22.76       | 20.96            |
| 3       | 466.20898 | 466.20943 | 0.97       | 5.11    | 4.57         | 3.73        | 3.44             |
| 4       | 467.21078 | 467.2119  | 2.39       | 0.67    | 0.55         | 0.49        | 0.42             |

--- End Of Report ---

# HPLC

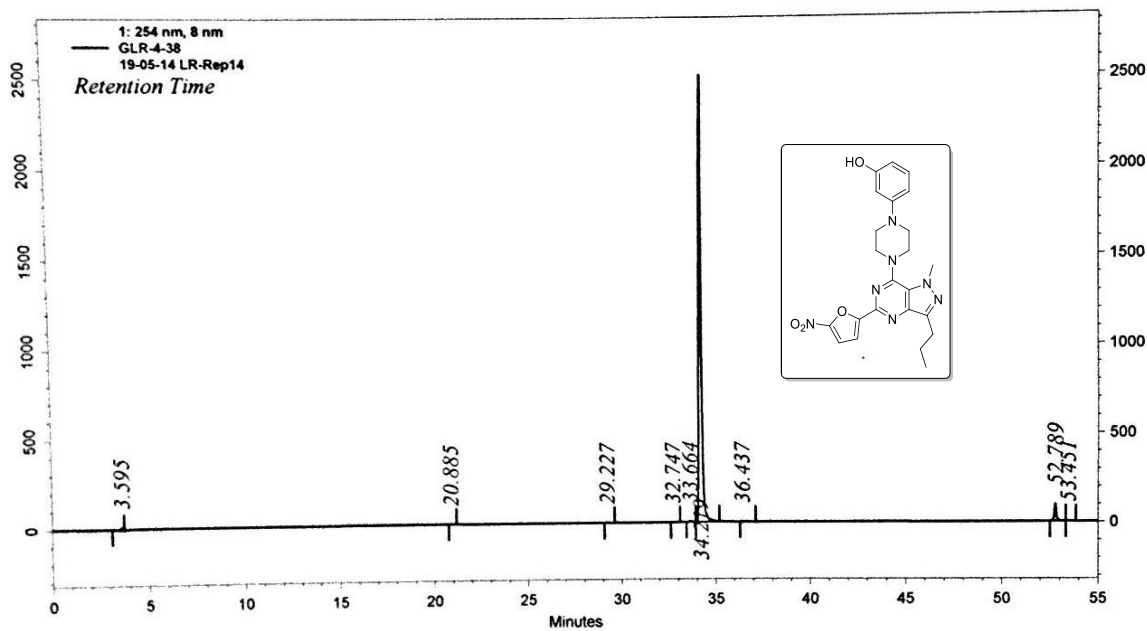

| 1: 254 nm, 8 nm |                |          |         |         |          |
|-----------------|----------------|----------|---------|---------|----------|
| Pk #            | Retention Time | Area     | Area %  | Height  | Height % |
| 1               | 3.595          | 120378   | 0.483   | 15181   | 0.575    |
| 2               | 20.885         | 14054    | 0.056   | 1582    | 0.060    |
| 3               | 29.227         | 33810    | 0.136   | 3349    | 0.127    |
| 4               | 32.747         | 10754    | 0.043   | 980     | 0.037    |
| 5               | 33.664         | 69821    | 0.280   | 6525    | 0.247    |
| 6               | 34.219         | 23947893 | 96.002  | 2511024 | 95.140   |
| 7               | 36.437         | 36623    | 0.147   | 1963    | 0.074    |
| 8               | 52.789         | 698526   | 2.800   | 97620   | 3.699    |
| 9               | 53.451         | 13214    | 0.053   | 1065    | 0.040    |
| Totals          |                | 24945073 | 100.000 | 2639289 | 100.000  |

# Compound (32)

<sup>1</sup>H NMR in CDCl<sub>3</sub>

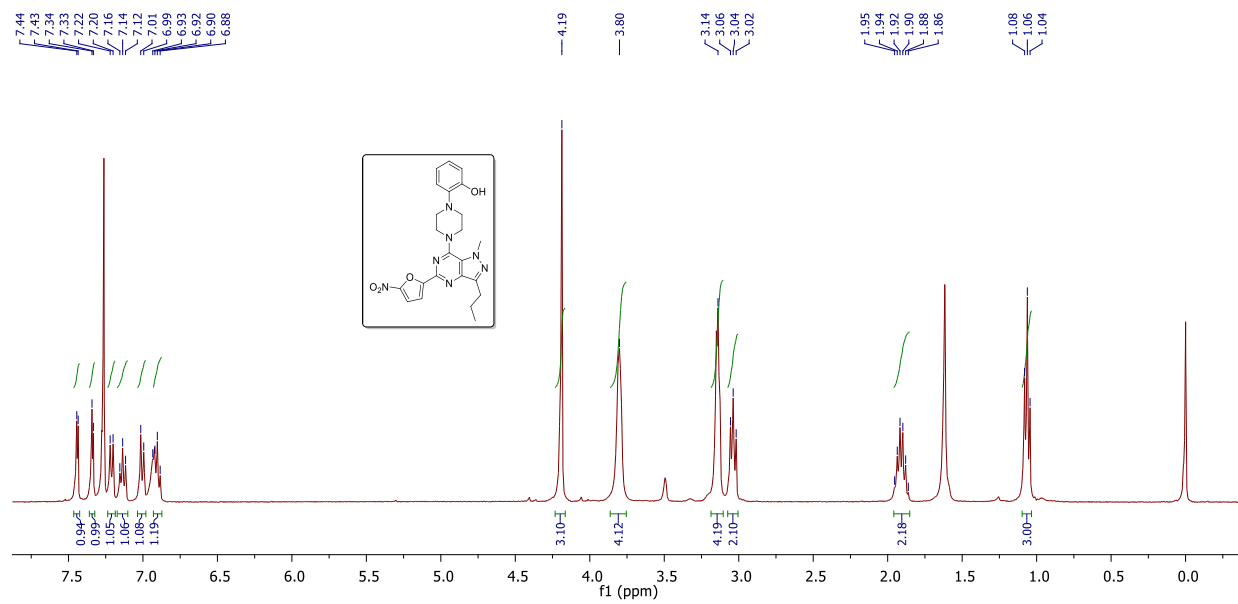

<sup>13</sup>C NMR in DMSO-d<sub>6</sub>

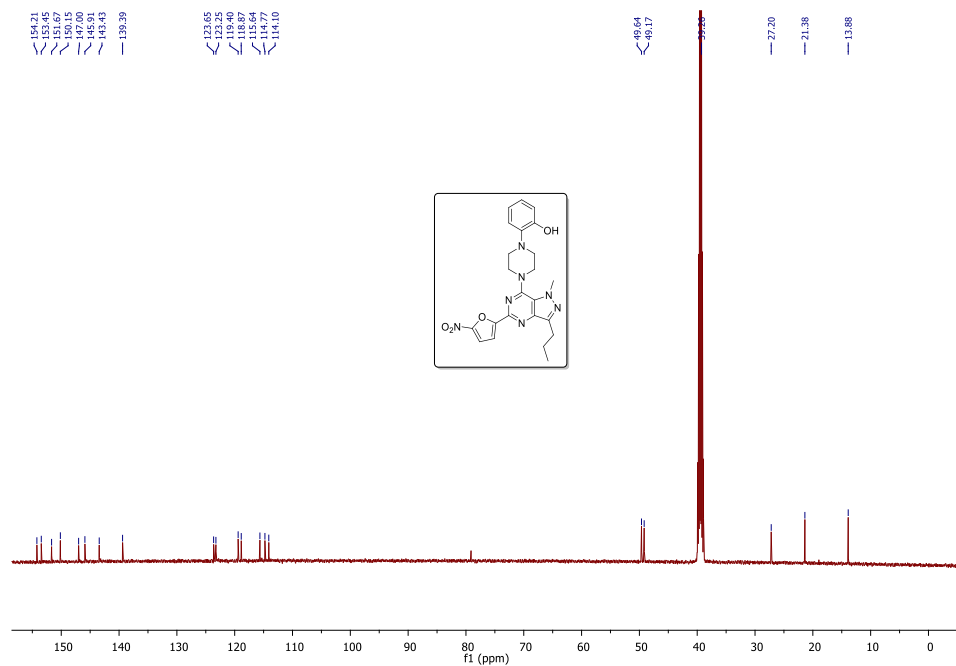



## Qualitative Compound Report

Data File GLR-4-39.d  
Sample Type Sample  
Instrument Name Instrument 1  
Acq Method vishal\_MS\_25072012.m  
IRM Calibration Status Success  
Comment

Sample Name GLR-4-39  
Position Vial 9  
User Name  
Acquired Time 11/19/2012 1:01:32 PM  
DA Method as.m

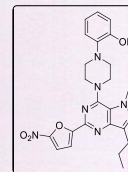

Sample Group Info.

| Compound Label       | RT    | Mass     | Formula       | MFG Formula   | MFG Diff (ppm) | DB Formula    |
|----------------------|-------|----------|---------------|---------------|----------------|---------------|
| Cpd 4: C23 H25 N7 O4 | 0.171 | 463.1964 | C23 H25 N7 O4 | C23 H25 N7 O4 | 0.87           | C23 H25 N7 O4 |

| Compound Label       | m/z       | RT    | Algorithm                 | Mass     |
|----------------------|-----------|-------|---------------------------|----------|
| Cpd 4: C23 H25 N7 O4 | 464.20368 | 0.171 | Find by Molecular Feature | 463.1964 |

MFE MS Spectrum  
Cpd 4: C23 H25 N7 O4: + MFE Spectrum (0.130-0.572 min) GLR-4-39.d

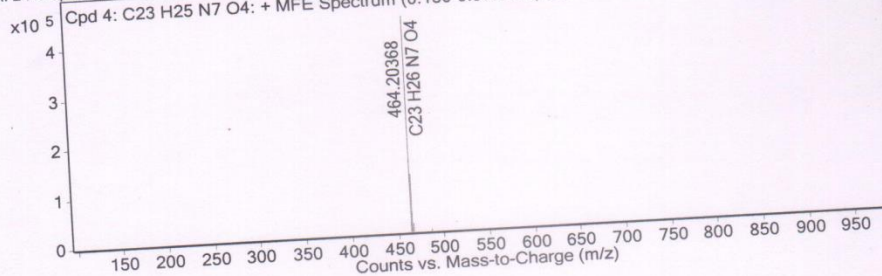

MS Spectrum Peak List

| m/z       | z | Abund    | Formula          | Ion     |
|-----------|---|----------|------------------|---------|
| 464.20368 | 1 | 436361   | C23 H26 N7 O4    | (M+H)+  |
| 465.20611 | 1 | 116429.5 | C23 H26 N7 O4    | (M+H)+  |
| 466.20809 | 1 | 16902.8  | C23 H26 N7 O4    | (M+H)+  |
| 467.21058 | 1 | 2940.3   | C23 H26 N7 O4    | (M+H)+  |
| 486.18616 | 1 | 3394.2   | C23 H25 N7 Na O4 | (M+Na)+ |
| 487.18794 | 1 | 509.1    | C23 H25 N7 Na O4 | (M+Na)+ |

Predicted Isotope Match Table

| Isotope | m/z       | Calc m/z  | Diff (ppm) | Abund % | Calc Abund % | Abund Sum % | Calc Abund Sum % |
|---------|-----------|-----------|------------|---------|--------------|-------------|------------------|
| 1       | 464.20368 | 464.20408 | 0.85       | 100     | 100          | 76.2        | 75.18            |
| 2       | 465.20611 | 465.20689 | 1.68       | 26.68   | 27.88        | 20.33       | 20.96            |
| 3       | 466.20809 | 466.20943 | 2.89       | 3.87    | 4.57         | 2.95        | 3.44             |
| 4       | 467.21058 | 467.2119  | 2.83       | 0.67    | 0.55         | 0.51        | 0.42             |

--- End Of Report ---

# HPLC

## <Chromatogram>

mAU

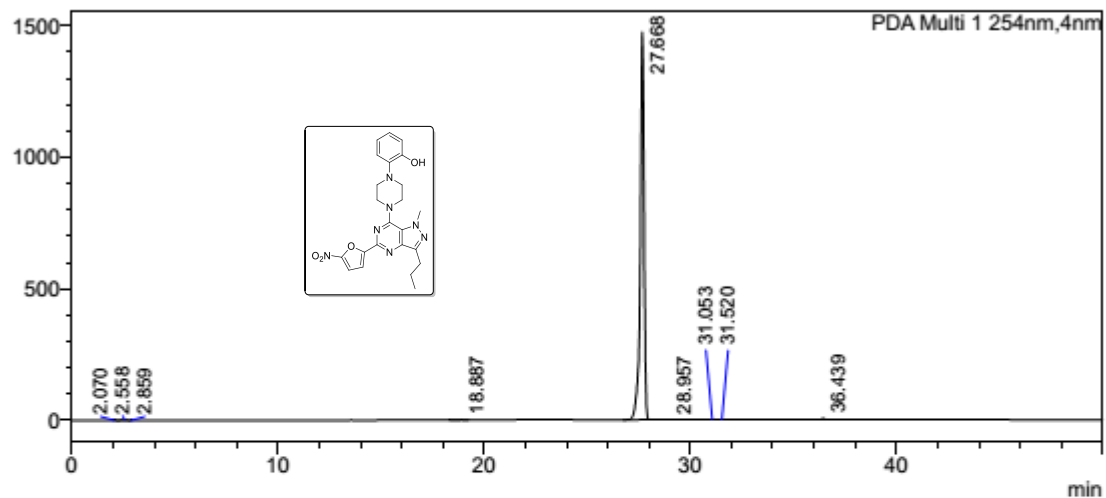

## <Peak Table>

PDA Ch1 254nm

| Peak# | Name | Ret. Time | Area     | Height  | Area%   | Height% |
|-------|------|-----------|----------|---------|---------|---------|
| 1     |      | 2.070     | 3052     | 423     | 0.016   | 0.028   |
| 2     |      | 2.558     | 58737    | 2872    | 0.308   | 0.193   |
| 3     |      | 2.859     | 3296     | 954     | 0.017   | 0.064   |
| 4     |      | 18.887    | 25108    | 1232    | 0.132   | 0.083   |
| 5     |      | 27.668    | 18875450 | 1473646 | 98.993  | 99.203  |
| 6     |      | 28.957    | 56933    | 1733    | 0.299   | 0.117   |
| 7     |      | 31.053    | 4307     | 275     | 0.023   | 0.019   |
| 8     |      | 31.520    | 201      | 37      | 0.001   | 0.002   |
| 9     |      | 36.439    | 40407    | 4320    | 0.212   | 0.291   |
| Total |      |           | 19067491 | 1485490 | 100.000 | 100.000 |

# Compound (33)

<sup>1</sup>H NMR in DMSO-d<sub>6</sub>

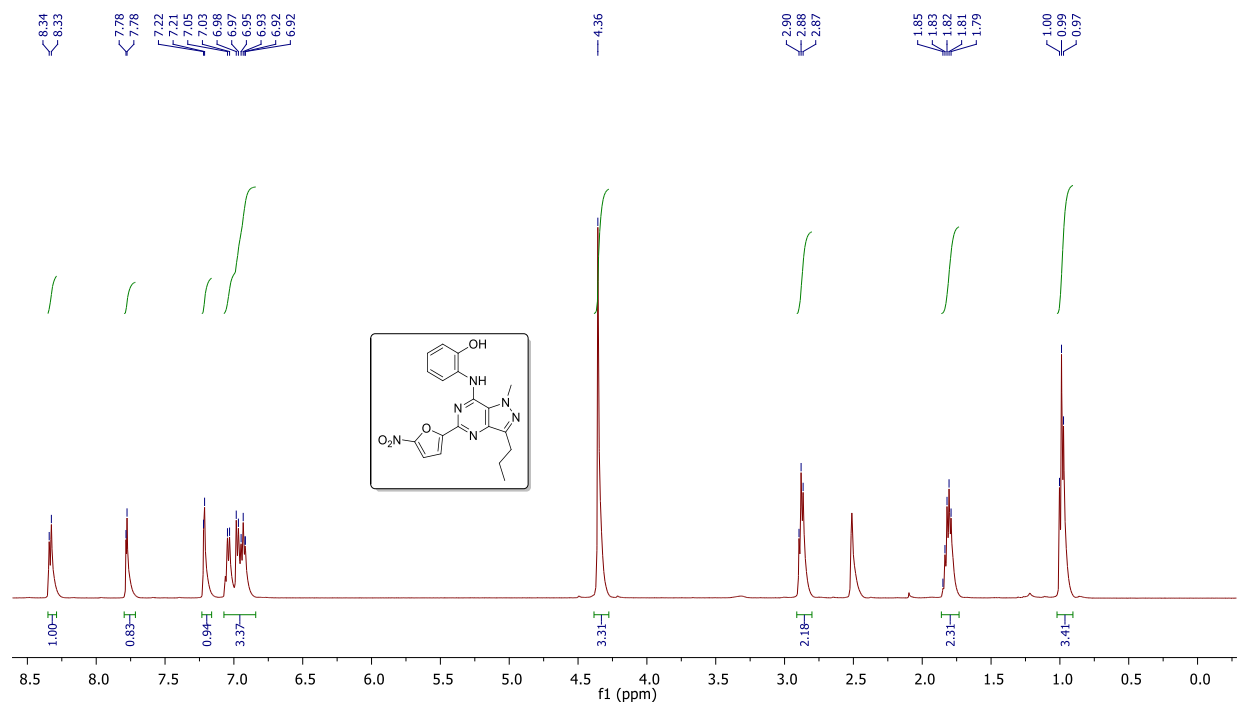

<sup>13</sup>C NMR in DMSO-d<sub>6</sub>

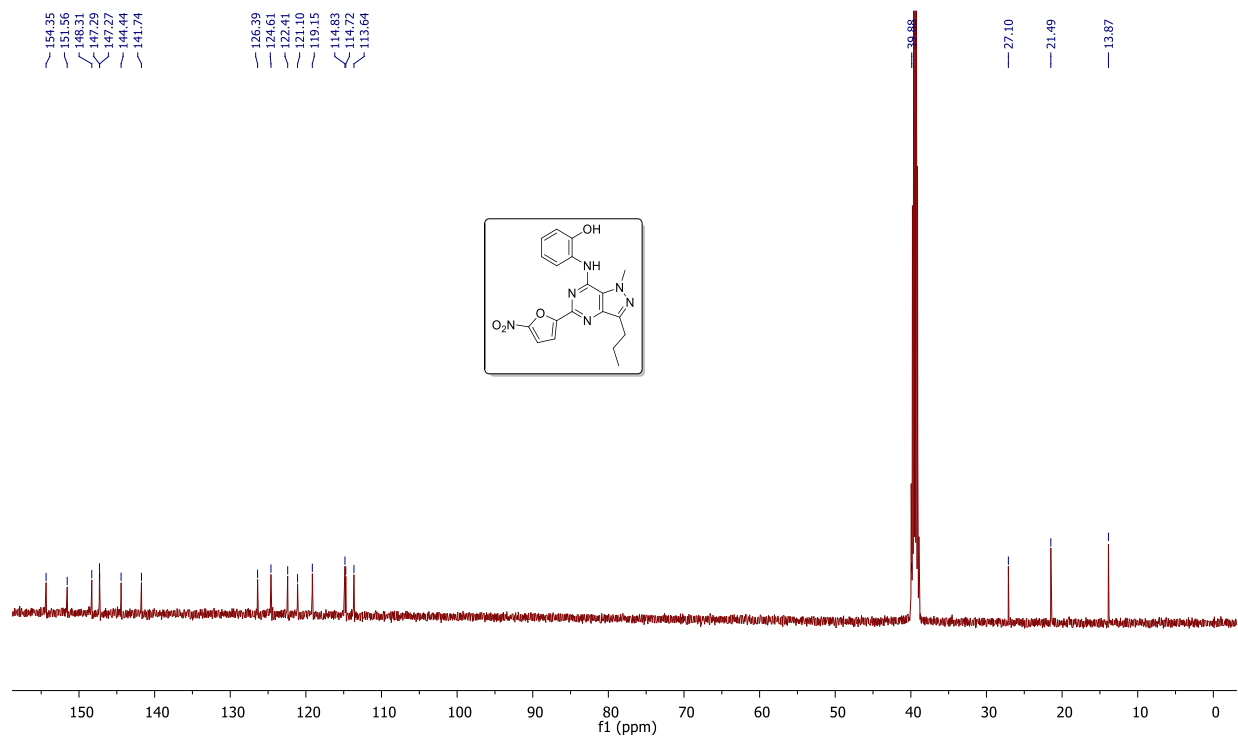

## Qualitative Compound Report

|                        |                   |               |                       |
|------------------------|-------------------|---------------|-----------------------|
| Data File              | GCR-4-33.d        | Sample Name   | GCR-4-33              |
| Sample Type            | Sample            | Position      | Vial 2                |
| Instrument Name        | Instrument 1      | User Name     |                       |
| Acq Method             | vishal_12-01-13.m | Acquired Time | 29-06-2015 PM 6:33:09 |
| IRM Calibration Status | Success           | DA Method     | daily_report.m        |
| Comment                |                   |               |                       |

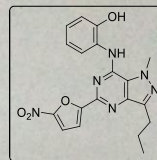

|                |                             |
|----------------|-----------------------------|
| Sample Group   | Info.                       |
| Acquisition SW | 6200 series TOF/6500 series |
| Version        | Q-TOF B.05.01 (B5125)       |

## Compound Table

| Compound Label        | RT    | Mass    | Formula       | MFG Formula   | MFG Diff (ppm) | DB Formula    |
|-----------------------|-------|---------|---------------|---------------|----------------|---------------|
| Cpd 12: C19 H18 N6 O4 | 0.266 | 394.138 | C19 H18 N6 O4 | C19 H18 N6 O4 | 2.54           | C19 H18 N6 O4 |

| Compound Label        | m/z      | RT    | Algorithm                 | Mass    |
|-----------------------|----------|-------|---------------------------|---------|
| Cpd 12: C19 H18 N6 O4 | 395.1453 | 0.266 | Find by Molecular Feature | 394.138 |

## MFE MS Spectrum

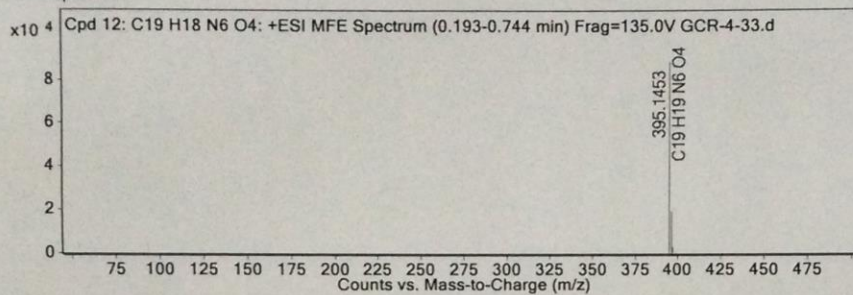

## MS Spectrum Peak List

| m/z      | z | Abund    | Formula       | Ion    |
|----------|---|----------|---------------|--------|
| 395.1453 | 1 | 88725.32 | C19 H19 N6 O4 | (M+H)+ |
| 396.1479 | 1 | 19502.1  | C19 H19 N6 O4 | (M+H)+ |
| 397.1506 | 1 | 2852.16  | C19 H19 N6 O4 | (M+H)+ |
| 398.143  | 1 | 373.73   | C19 H19 N6 O4 | (M+H)+ |

## Predicted Isotope Match Table

| Isotope | m/z      | Calc m/z | Diff (ppm) | Abund % | Calc Abund % | Abund Sum % | Calc Abund Sum % |
|---------|----------|----------|------------|---------|--------------|-------------|------------------|
| 1       | 395.1453 | 395.1462 | 2.36       | 100     | 100          | 79.61       | 78.83            |
| 2       | 396.1479 | 396.149  | 2.87       | 21.98   | 23.11        | 17.5        | 18.22            |
| 3       | 397.1506 | 397.1515 | 2.16       | 3.21    | 3.38         | 2.56        | 2.66             |
| 4       | 398.143  | 398.1539 | 27.25      | 0.42    | 0.37         | 0.34        | 0.29             |

--- End Of Report ---

# HPLC

## <Chromatogram>

mAU

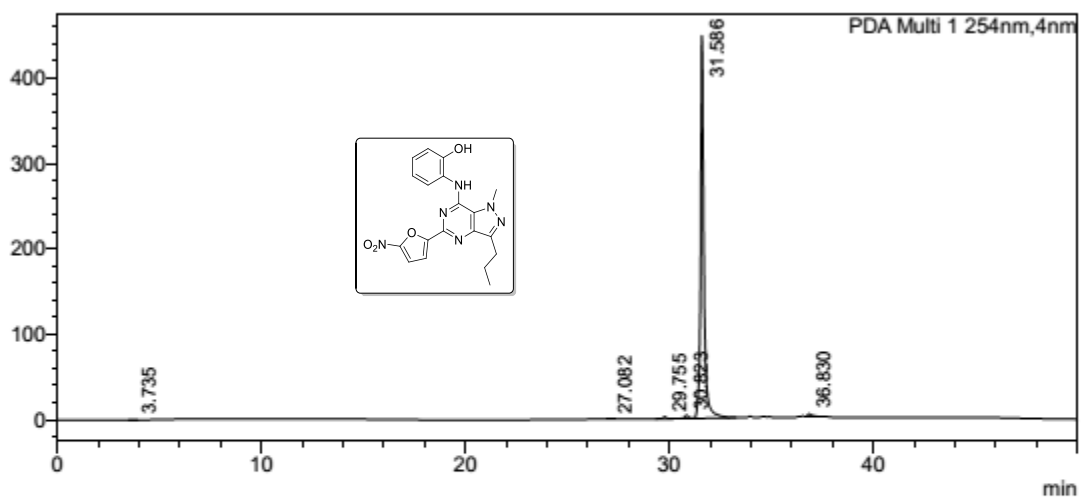

## <Peak Table>

PDA Ch1 254nm

| Peak# | Ret. Time | Area    | Height | Area%   | Height% |
|-------|-----------|---------|--------|---------|---------|
| 1     | 3.735     | 3233    | 275    | 0.061   | 0.060   |
| 2     | 27.082    | 2253    | 261    | 0.042   | 0.057   |
| 3     | 29.755    | 34028   | 2442   | 0.639   | 0.533   |
| 4     | 30.823    | 57222   | 4195   | 1.075   | 0.915   |
| 5     | 31.586    | 5165122 | 447714 | 97.060  | 97.667  |
| 6     | 36.830    | 59705   | 3521   | 1.122   | 0.768   |
| Total |           | 5321563 | 458408 | 100.000 | 100.000 |

## Compound (34)

### $^1\text{H}$ NMR in Acetone- $\text{d}_6$

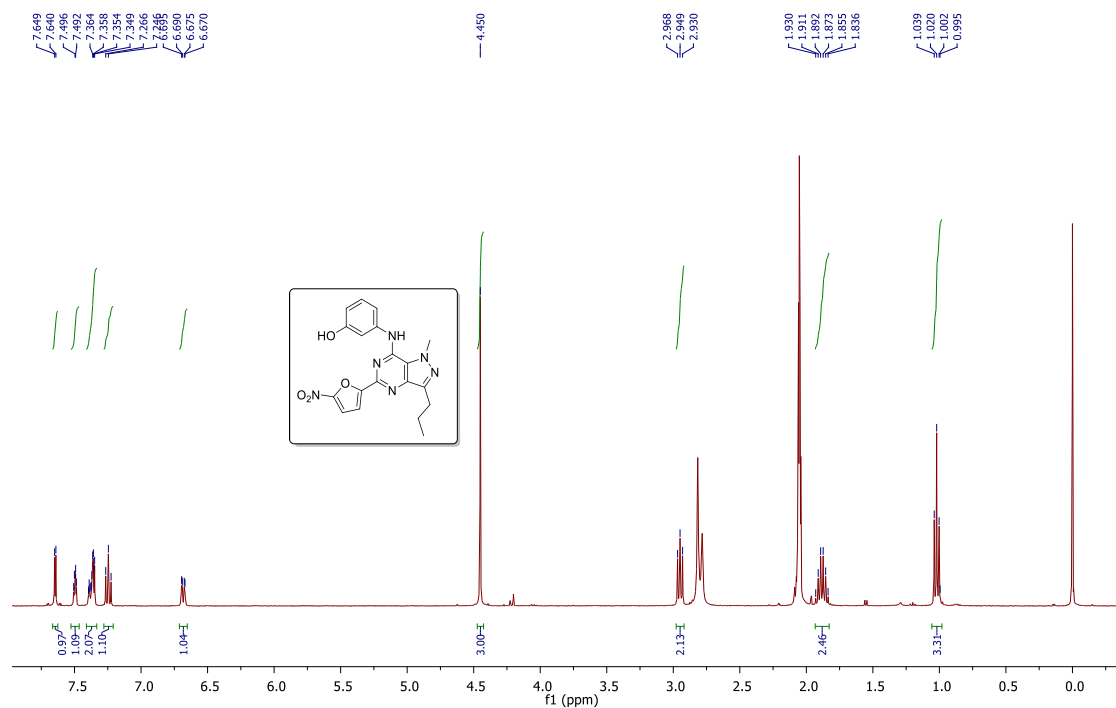

### $^{13}\text{C}$ NMR in DMSO- $\text{d}_6$

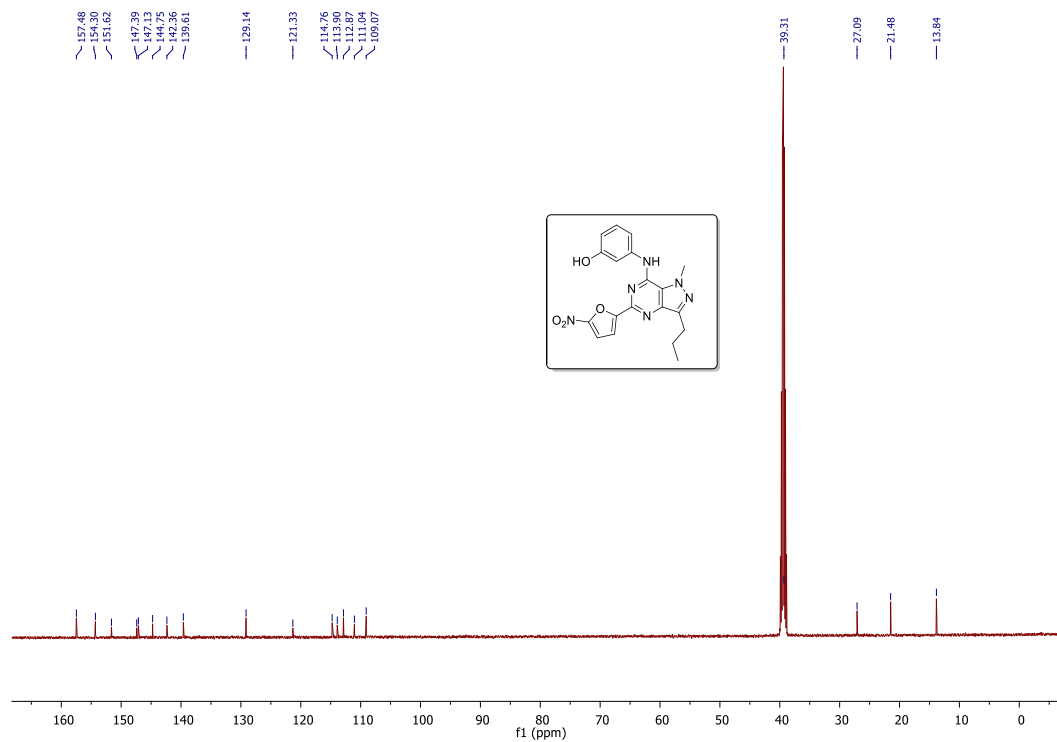



## HRMS

## Qualitative Compound Report

**Data File** GLR-4-27.d  
**Sample Type** Sample  
**Instrument Name** Instrument 1  
**Acq Method** 29\_may\_\_positive.m  
**IRM Calibration Status** All Ions Missed  
**Comment**  
**Sample Name** GLR-4-27  
**Position** 1  
**User Name**  
**Acquired Time** 6/4/2012 1:15:01 PM  
**DA Method** as.m

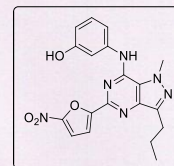

**Sample Group** Info.

## Compound Table

| Compound Label        | RT   | Mass      | Formula       | MFG Formula   | MFG Diff (ppm) | DB Formula    |
|-----------------------|------|-----------|---------------|---------------|----------------|---------------|
| Cpd 34: C19 H18 N6 O4 | 0.32 | 394.13826 | C19 H18 N6 O4 | C19 H18 N6 O4 | 1.75           | C19 H18 N6 O4 |

| Compound Label        | m/z       | RT   | Algorithm                 | Mass      |
|-----------------------|-----------|------|---------------------------|-----------|
| Cpd 34: C19 H18 N6 O4 | 395.14553 | 0.32 | Find by Molecular Feature | 394.13826 |

## MFE MS Spectrum

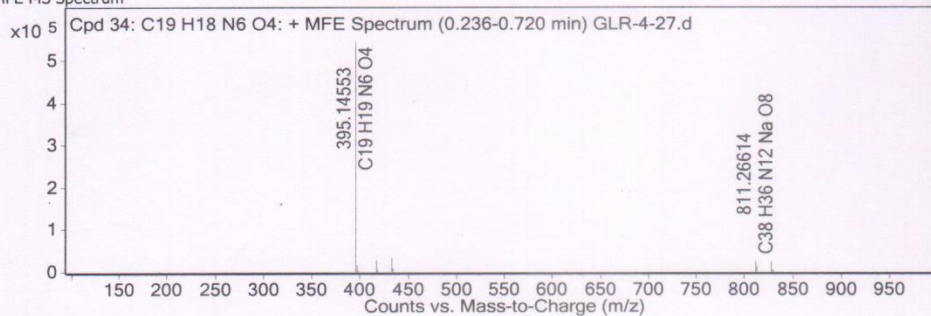

## MS Spectrum Peak List

| m/z       | z | Abund    | Formula           | Ion      |
|-----------|---|----------|-------------------|----------|
| 395.14553 | 1 | 544598.1 | C19 H19 N6 O4     | (M+H)+   |
| 396.14906 | 1 | 117609   | C19 H19 N6 O4     | (M+H)+   |
| 397.15002 | 1 | 18189    | C19 H19 N6 O4     | (M+H)+   |
| 417.1278  | 1 | 28855.3  | C19 H18 N6 Na O4  | (M+Na)+  |
| 433.10154 | 1 | 34032.1  | C19 H18 K N6 O4   | (M+K)+   |
| 434.1044  | 1 | 8206     | C19 H18 K N6 O4   | (M+K)+   |
| 811.26614 | 1 | 26655.5  | C38 H36 N12 Na O8 | (2M+Na)+ |
| 812.26847 | 1 | 13316.7  | C38 H36 N12 Na O8 | (2M+Na)+ |
| 827.23687 | 1 | 25617.8  | C38 H36 K N12 O8  | (2M+K)+  |
| 828.2422  | 1 | 11309    | C38 H36 K N12 O8  | (2M+K)+  |

## Predicted Isotope Match Table

| Isotope | m/z       | Calc m/z  | Diff (ppm) | Abund % | Calc Abund % | Abund Sum % | Calc Abund Sum % |
|---------|-----------|-----------|------------|---------|--------------|-------------|------------------|
| 1       | 395.14553 | 395.14623 | 1.76       | 100     | 100          | 79.74       | 78.83            |
| 2       | 396.14906 | 396.14902 | -0.11      | 21.6    | 23.11        | 17.22       | 18.22            |
| 3       | 397.15002 | 397.15146 | 3.62       | 3.34    | 3.38         | 2.66        | 2.66             |
| 4       | 398.15323 | 398.15386 | 1.6        | 0.47    | 0.37         | 0.37        | 0.29             |

--- End Of Report ---

## HPLC

### <Chromatogram>

mAU

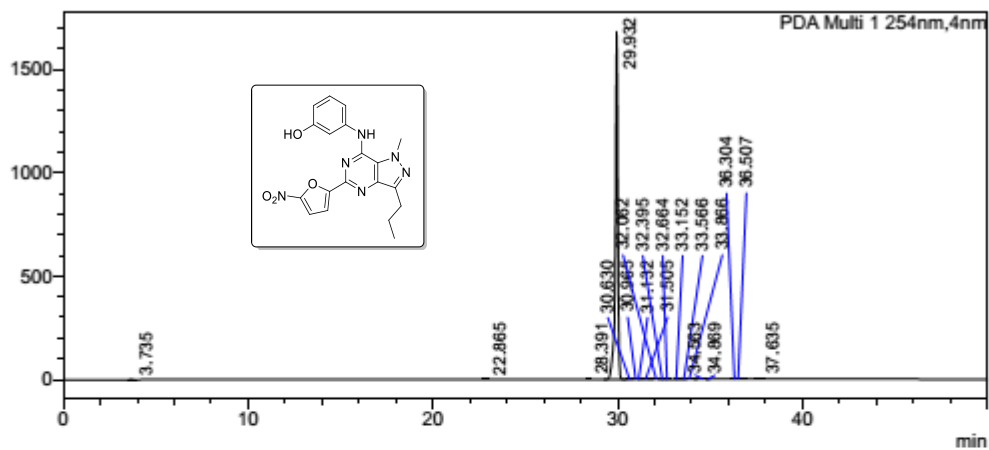

### <Peak Table>

PDA Ch1 254nm

| Peak# | Ret. Time | Area     | Height  | Area%   | Height% |
|-------|-----------|----------|---------|---------|---------|
| 1     | 3.735     | 3618     | 307     | 0.023   | 0.018   |
| 2     | 22.865    | 3566     | 302     | 0.023   | 0.018   |
| 3     | 28.391    | 4146     | 452     | 0.026   | 0.027   |
| 4     | 29.932    | 15639625 | 1681682 | 98.810  | 99.038  |
| 5     | 30.630    | 14365    | 1007    | 0.091   | 0.059   |
| 6     | 30.965    | 14933    | 1391    | 0.094   | 0.082   |
| 7     | 31.132    | 8188     | 849     | 0.052   | 0.050   |
| 8     | 31.505    | 14036    | 1015    | 0.089   | 0.060   |
| 9     | 32.062    | 31640    | 2973    | 0.200   | 0.175   |
| 10    | 32.395    | 1271     | 150     | 0.008   | 0.009   |
| 11    | 32.664    | 4994     | 513     | 0.032   | 0.030   |
| 12    | 33.152    | 1621     | 123     | 0.010   | 0.007   |
| 13    | 33.566    | 1240     | 170     | 0.008   | 0.010   |
| 14    | 33.866    | 30674    | 2208    | 0.194   | 0.130   |
| 15    | 34.563    | 24599    | 2097    | 0.155   | 0.124   |
| 16    | 34.869    | 2705     | 308     | 0.017   | 0.018   |
| 17    | 36.304    | 4339     | 530     | 0.027   | 0.031   |
| 18    | 36.507    | 17486    | 1566    | 0.110   | 0.092   |
| 19    | 37.635    | 4918     | 383     | 0.031   | 0.023   |
| Total |           | 15827965 | 1698025 | 100.000 | 100.000 |

## Compound (35)

### $^1\text{H}$ NMR in Acetone- $\text{d}_6$

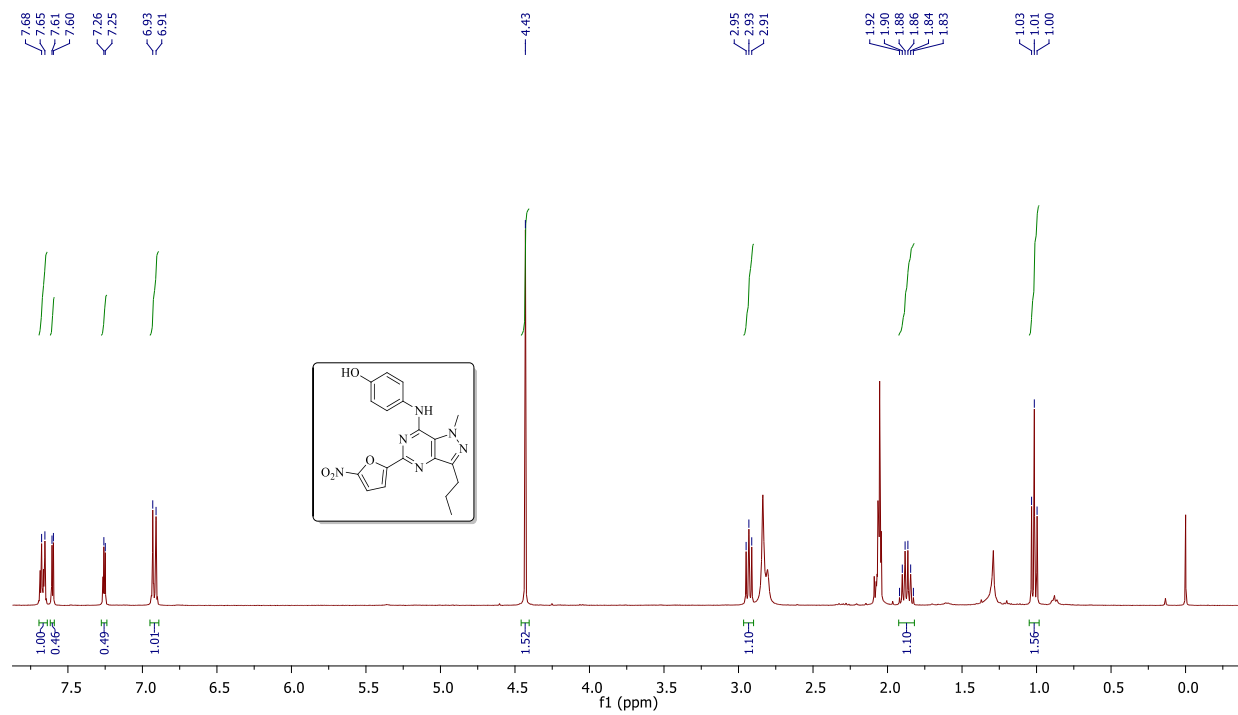

### <sup>13</sup>C NMR in Acetone-d<sub>6</sub>

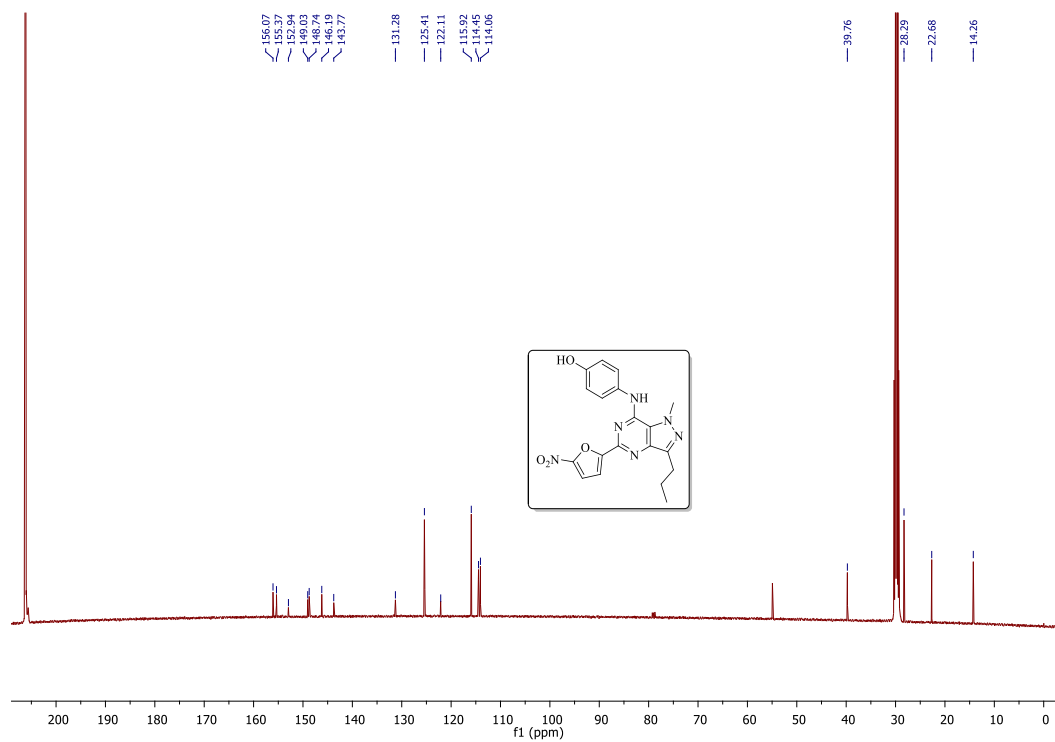

# HRMS

## Qualitative Compound Report

Data File SDS-LR-59.d Sample Name SDS-LR-59  
 Sample Type Sample Position Vial 9  
 Instrument Name Instrument 1 User Name  
 Acq Method vishal\_12-01-13.m Acquired Time 09-07-2013 PM 1:00:32  
 IRM Calibration Status Success DA Method daily\_report.m  
 Comment

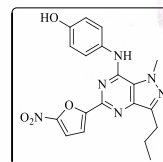

Sample Group Info.  
 Acquisition SW 6200 series TOF/6500 series  
 Version Q-TOF B.05.01 (B5125)

### Compound Table

| Compound Label       | RT    | Mass    | Formula       | MFG Formula   | MFG Diff (ppm) | DB Formula    |
|----------------------|-------|---------|---------------|---------------|----------------|---------------|
| Cpd 9: C19 H18 N6 O4 | 0.196 | 394.139 | C19 H18 N6 O4 | C19 H18 N6 O4 | -0.07          | C19 H18 N6 O4 |

| Compound Label       | m/z      | RT    | Algorithm                 | Mass    |
|----------------------|----------|-------|---------------------------|---------|
| Cpd 9: C19 H18 N6 O4 | 395.1463 | 0.196 | Find by Molecular Feature | 394.139 |

### MFE MS Spectrum

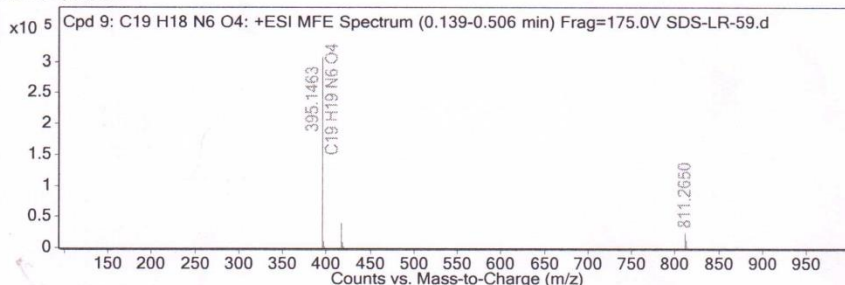

### MS Spectrum Peak List

| m/z      | z | Abund     | Formula          | Ion      |
|----------|---|-----------|------------------|----------|
| 395.1463 | 1 | 307886.81 | C19 H19 N6 O4    | (M+H)+   |
| 396.1487 | 1 | 69651.94  | C19 H19 N6 O4    | (M+H)+   |
| 397.1511 | 1 | 10527.27  | C19 H19 N6 O4    | (M+H)+   |
| 398.1521 | 1 | 1216.98   | C19 H19 N6 O4    | (M+H)+   |
| 417.1277 | 1 | 39788.2   | C19 H18 N6 Na O4 | (M+Na)+  |
| 418.1314 | 1 | 8419.64   | C19 H18 N6 Na O4 | (M+Na)+  |
| 419.1316 | 1 | 1643.5    | C19 H18 N6 Na O4 | (M+Na)+  |
| 811.265  | 1 | 25112.88  |                  | (2M+Na)+ |
| 812.2685 | 1 | 11525.41  |                  | (2M+Na)+ |
| 813.2712 | 1 | 3134.63   |                  | (2M+Na)+ |

### Predicted Isotope Match Table

| Isotope | m/z      | Calc m/z | Diff (ppm) | Abund % | Calc Abund % | Abund Sum % | Calc Abund Sum % |
|---------|----------|----------|------------|---------|--------------|-------------|------------------|
| 1       | 395.1463 | 395.1462 | -0.29      | 100     | 100          | 79.09       | 78.83            |
| 2       | 396.1487 | 396.149  | 0.71       | 22.62   | 23.11        | 17.89       | 18.22            |
| 3       | 397.1511 | 397.1515 | 0.78       | 3.42    | 3.38         | 2.7         | 2.66             |
| 4       | 398.1521 | 398.1539 | 4.51       | 0.4     | 0.37         | 0.31        | 0.29             |

--- End Of Report ---

# HPLC

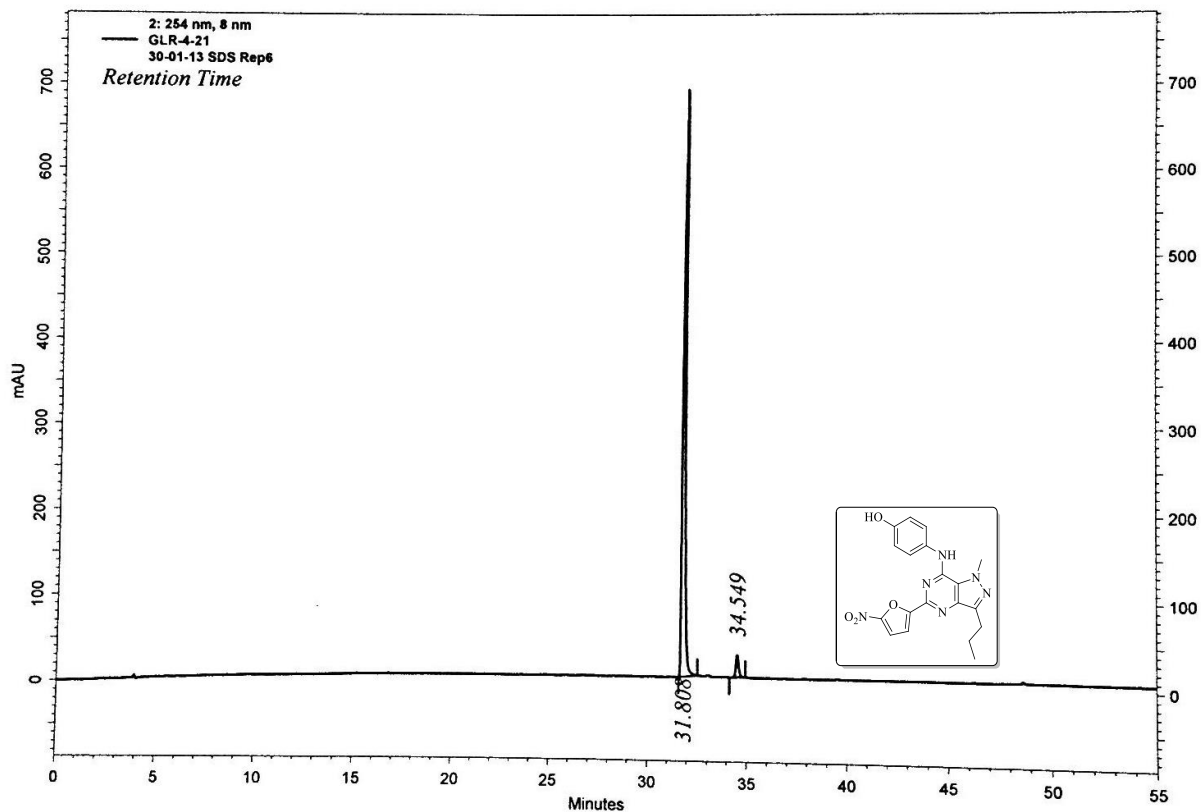

2: 254 nm, 8 nm

| Pk #   | Retention Time | Area    | Area %  | Height | Height % |
|--------|----------------|---------|---------|--------|----------|
| 1      | 31.808         | 6510096 | 96.268  | 686468 | 96.419   |
| 2      | 34.549         | 252349  | 3.732   | 25498  | 3.581    |
| Totals |                | 6762445 | 100.000 | 711966 | 100.000  |

# Compound (36)

<sup>1</sup>H NMR in CDCl<sub>3</sub>

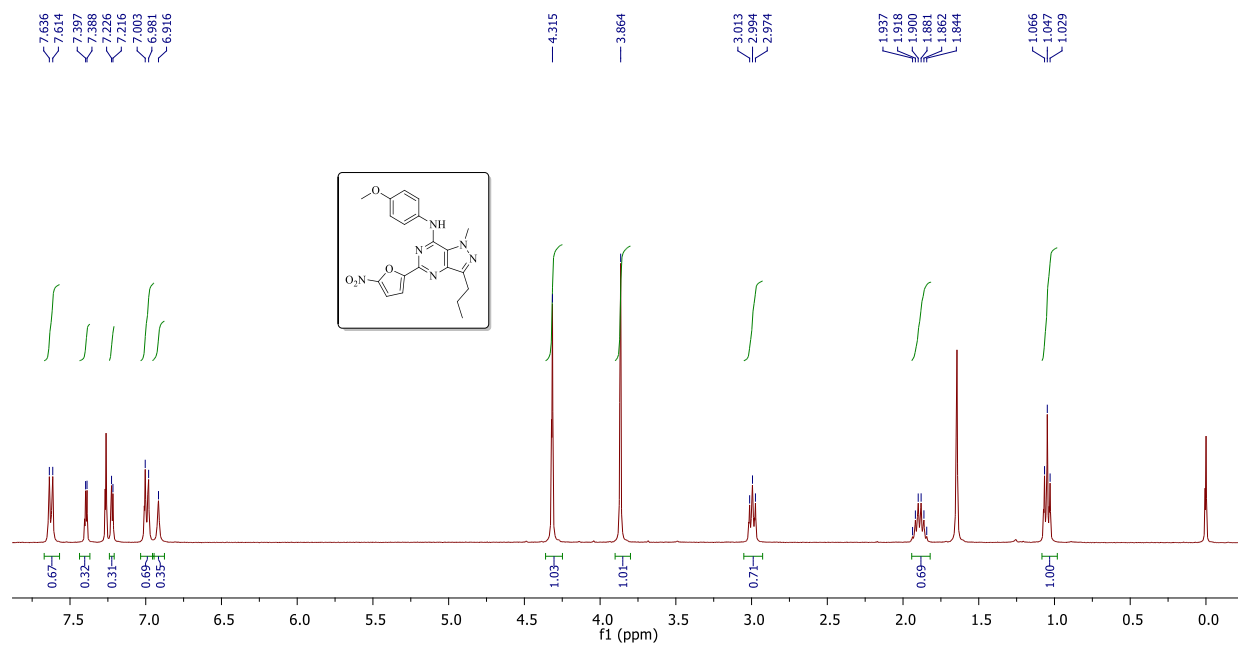

<sup>13</sup>C NMR in CDCl<sub>3</sub>

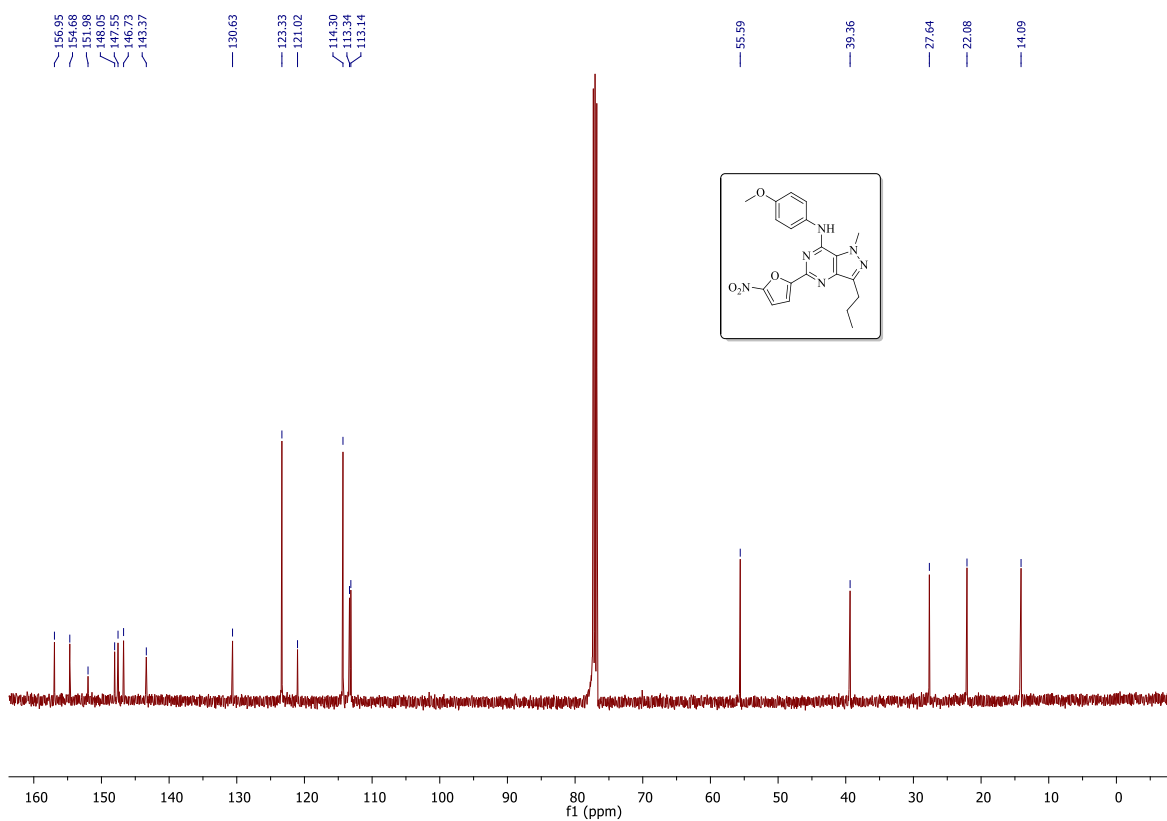



# HRMS

## Qualitative Compound Report

**Data File** GLR-4-32.d  
**Sample Type** Sample  
**Instrument Name** Instrument 1  
**Acq Method** visha\_MS\_25072012.m  
**IRM Calibration Status** Success  
**Comment**  
**Sample Name** GLR-4-32  
**Position** Vial 4  
**User Name**  
**Acquired Time** 11/19/2012 12:36:43 PM  
**DA Method** as.m

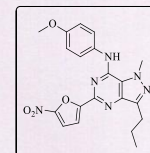

**Sample Group** Info.

### Compound Table

| Compound Label                                                       | RT    | Mass      | Formula                                                       | MFG Formula                                                   | MFG Diff (ppm) | DB Formula                                                    |
|----------------------------------------------------------------------|-------|-----------|---------------------------------------------------------------|---------------------------------------------------------------|----------------|---------------------------------------------------------------|
| Cpd 6: C <sub>20</sub> H <sub>20</sub> N <sub>6</sub> O <sub>4</sub> | 0.172 | 408.15402 | C <sub>20</sub> H <sub>20</sub> N <sub>6</sub> O <sub>4</sub> | C <sub>20</sub> H <sub>20</sub> N <sub>6</sub> O <sub>4</sub> | 1.43           | C <sub>20</sub> H <sub>20</sub> N <sub>6</sub> O <sub>4</sub> |

| Compound Label                                                       | m/z      | RT    | Algorithm                 | Mass      |
|----------------------------------------------------------------------|----------|-------|---------------------------|-----------|
| Cpd 6: C <sub>20</sub> H <sub>20</sub> N <sub>6</sub> O <sub>4</sub> | 409.1613 | 0.172 | Find by Molecular Feature | 408.15402 |

### MFE MS Spectrum

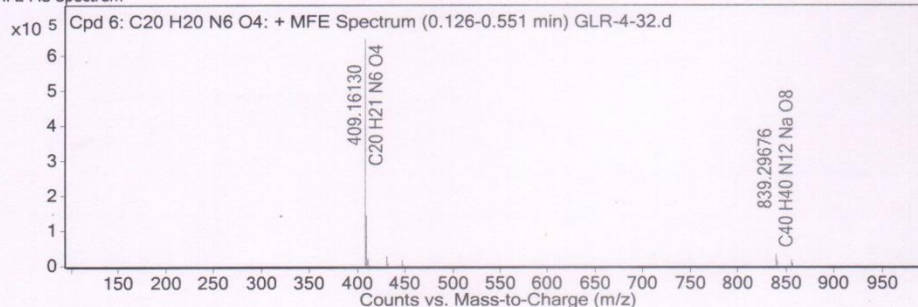

### MS Spectrum Peak List

| m/z       | z | Abund    | Formula                                                           | Ion                  |
|-----------|---|----------|-------------------------------------------------------------------|----------------------|
| 409.1613  | 1 | 646423.4 | C <sub>20</sub> H <sub>21</sub> N <sub>6</sub> O <sub>4</sub>     | (M+H) <sup>+</sup>   |
| 410.16397 | 1 | 143567.2 | C <sub>20</sub> H <sub>21</sub> N <sub>6</sub> O <sub>4</sub>     | (M+H) <sup>+</sup>   |
| 411.16613 | 1 | 20171.5  | C <sub>20</sub> H <sub>21</sub> N <sub>6</sub> O <sub>4</sub>     | (M+H) <sup>+</sup>   |
| 431.14238 | 1 | 26980.6  | C <sub>20</sub> H <sub>20</sub> N <sub>6</sub> Na O <sub>4</sub>  | (M+Na) <sup>+</sup>  |
| 432.14612 | 1 | 6596.8   | C <sub>20</sub> H <sub>20</sub> N <sub>6</sub> Na O <sub>4</sub>  | (M+Na) <sup>+</sup>  |
| 447.11766 | 1 | 15701.7  | C <sub>20</sub> H <sub>20</sub> K N <sub>6</sub> O <sub>4</sub>   | (M+K) <sup>+</sup>   |
| 839.29676 | 1 | 33978    | C <sub>40</sub> H <sub>40</sub> N <sub>12</sub> Na O <sub>8</sub> | (2M+Na) <sup>+</sup> |
| 840.29929 | 1 | 15786.4  | C <sub>40</sub> H <sub>40</sub> N <sub>12</sub> Na O <sub>8</sub> | (2M+Na) <sup>+</sup> |
| 855.27026 | 1 | 16701.6  | C <sub>40</sub> H <sub>40</sub> K N <sub>12</sub> O <sub>8</sub>  | (2M+K) <sup>+</sup>  |
| 856.27436 | 1 | 6608.2   | C <sub>40</sub> H <sub>40</sub> K N <sub>12</sub> O <sub>8</sub>  | (2M+K) <sup>+</sup>  |

### Predicted Isotope Match Table

| Isotope | m/z       | Calc m/z  | Diff (ppm) | Abund % | Calc Abund % | Abund Sum % | Calc Abund Sum % |
|---------|-----------|-----------|------------|---------|--------------|-------------|------------------|
| 1       | 409.1613  | 409.16188 | 1.42       | 100     | 100          | 79.45       | 77.97            |
| 2       | 410.16397 | 410.1647  | 1.78       | 22.21   | 24.22        | 17.65       | 18.88            |
| 3       | 411.16613 | 411.16718 | 2.56       | 3.12    | 3.63         | 2.48        | 2.83             |
| 4       | 412.16933 | 412.16961 | 0.67       | 0.53    | 0.41         | 0.42        | 0.32             |

--- End Of Report ---

# HPLC

## <Chromatogram>

mAU

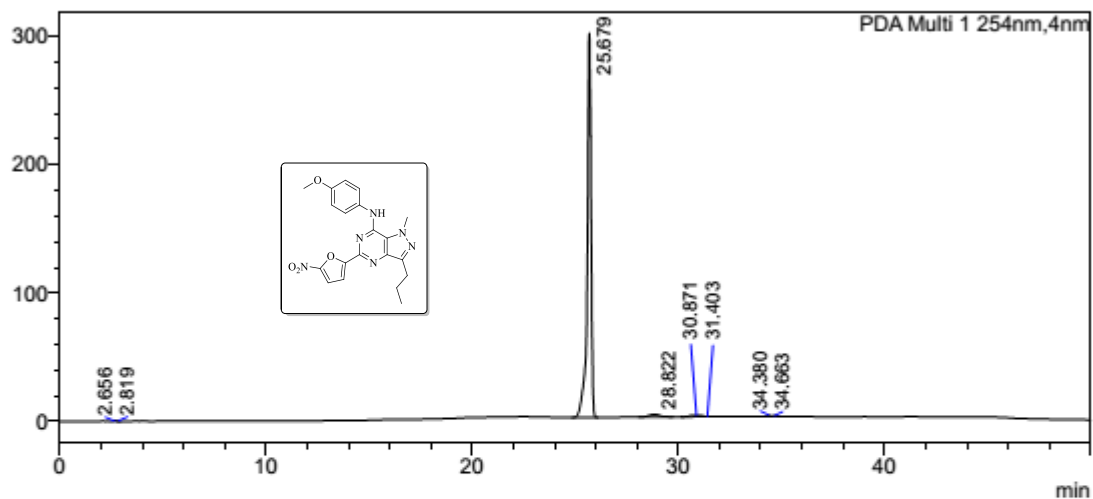

## <Peak Table>

PDA Ch1 254nm

| Peak# | Name | Ret. Time | Area    | Height | Area%   | Height% |
|-------|------|-----------|---------|--------|---------|---------|
| 1     |      | 2.656     | 1244    | 193    | 0.031   | 0.063   |
| 2     |      | 2.819     | 3413    | 469    | 0.085   | 0.154   |
| 3     |      | 25.679    | 3867286 | 299855 | 96.247  | 98.190  |
| 4     |      | 28.822    | 81184   | 2126   | 2.020   | 0.696   |
| 5     |      | 30.871    | 47681   | 1146   | 1.187   | 0.375   |
| 6     |      | 31.403    | 3952    | 397    | 0.098   | 0.130   |
| 7     |      | 34.380    | 8786    | 785    | 0.219   | 0.257   |
| 8     |      | 34.663    | 4528    | 410    | 0.113   | 0.134   |
| Total |      |           | 4018072 | 305382 | 100.000 | 100.000 |

# Compound (37)

<sup>1</sup>H NMR in CDCl<sub>3</sub>

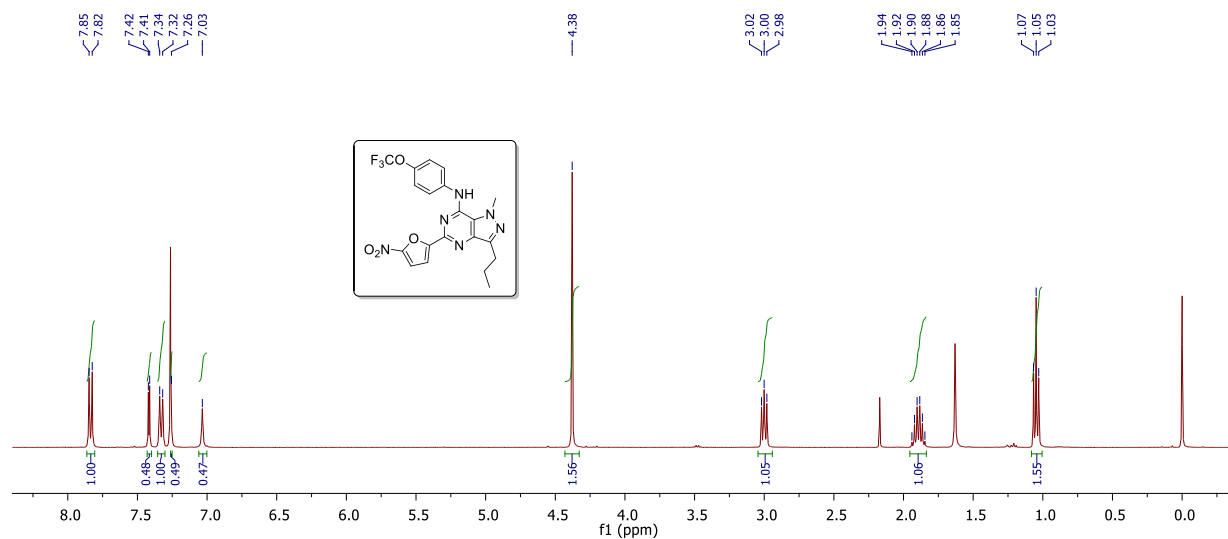

<sup>13</sup>C NMR in DMSO-d<sub>6</sub>

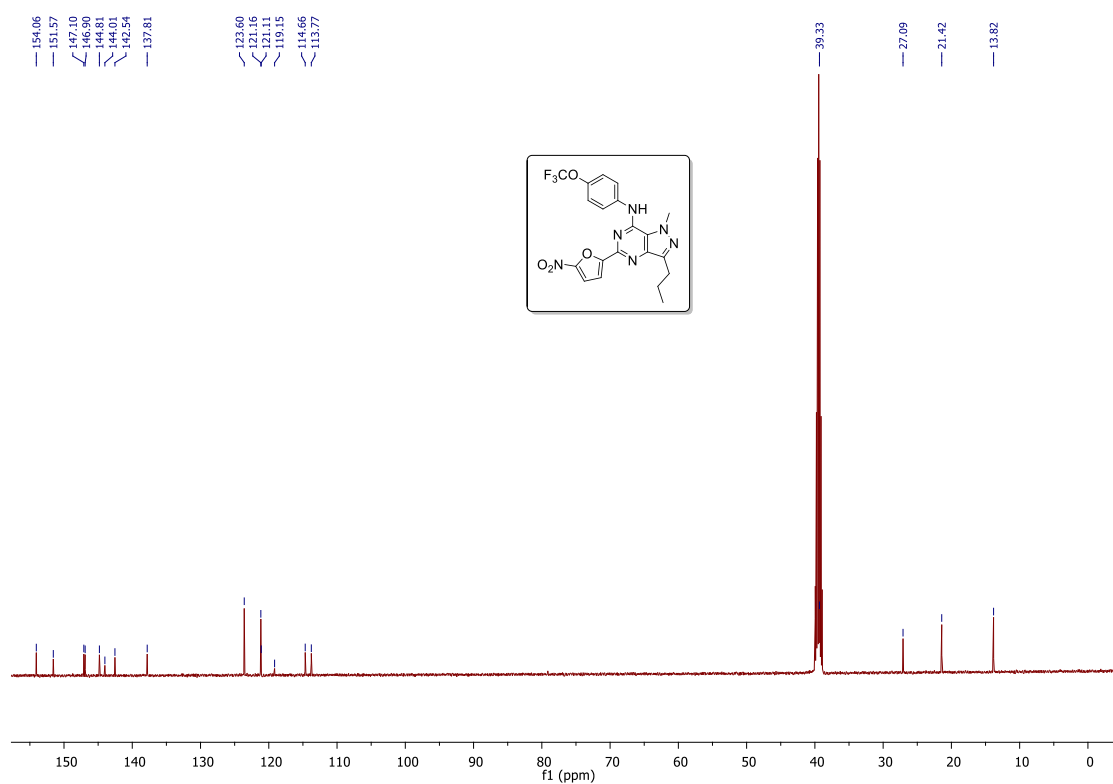

## Qualitative Compound Report

|                        |                      |               |                       |
|------------------------|----------------------|---------------|-----------------------|
| Data File              | GLR-6.d              | Sample Name   | GLR-6                 |
| Sample Type            | Sample               | Position      | Vial 18               |
| Instrument Name        | Instrument 1         | User Name     |                       |
| Acq Method             | vishal_MS_25072012.m | Acquired Time | 11/18/2012 1:15:54 PM |
| IRM Calibration Status | Success              | DA Method     | as.m                  |
| Comment                |                      |               |                       |

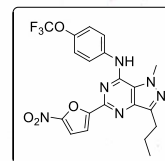

Sample Group      Info.

### Compound Table

| Compound Label          | RT    | Mass      | Formula          | MFG Formula      | MFG Diff (ppm) | DB Formula       |
|-------------------------|-------|-----------|------------------|------------------|----------------|------------------|
| Cpd 4: C20 H17 F3 N6 O4 | 0.172 | 462.12592 | C20 H17 F3 N6 O4 | C20 H17 F3 N6 O4 | 0.91           | C20 H17 F3 N6 O4 |

| Compound Label          | m/z      | RT    | Algorithm                 | Mass      |
|-------------------------|----------|-------|---------------------------|-----------|
| Cpd 4: C20 H17 F3 N6 O4 | 463.1332 | 0.172 | Find by Molecular Feature | 462.12592 |

### MFE MS Spectrum

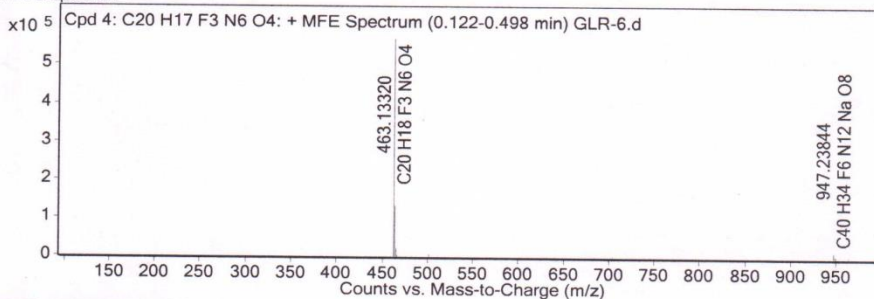

### MS Spectrum Peak List

| m/z       | z | Abund    | Formula              | Ion      |
|-----------|---|----------|----------------------|----------|
| 463.1332  | 1 | 568808.3 | C20 H18 F3 N6 O4     | (M+H)+   |
| 464.13579 | 1 | 131893.8 | C20 H18 F3 N6 O4     | (M+H)+   |
| 465.13886 | 1 | 20175.6  | C20 H18 F3 N6 O4     | (M+H)+   |
| 466.1372  | 1 | 2932.9   | C20 H18 F3 N6 O4     | (M+H)+   |
| 501.08746 | 1 | 6053.9   | C20 H17 F3 K N6 O4   | (M+K)+   |
| 502.09058 | 1 | 1364.8   | C20 H17 F3 K N6 O4   | (M+K)+   |
| 947.23844 | 1 | 14232.7  | C40 H34 F6 N12 Na O8 | (2M+Na)+ |
| 948.24204 | 1 | 6514.4   | C40 H34 F6 N12 Na O8 | (2M+Na)+ |
| 949.24633 | 1 | 1990.3   | C40 H34 F6 N12 Na O8 | (2M+Na)+ |
| 963.21522 | 1 | 1511.5   | C40 H34 F6 K N12 O8  | (2M+K)+  |

### Predicted Isotope Match Table

| Isotope | m/z       | Calc m/z  | Diff (ppm) | Abund % | Calc Abund % | Abund Sum % | Calc Abund Sum % |
|---------|-----------|-----------|------------|---------|--------------|-------------|------------------|
| 1       | 463.1332  | 463.13361 | 0.9        | 100     | 100          | 78.59       | 77.99            |
| 2       | 464.13579 | 464.13643 | 1.36       | 23.19   | 24.18        | 18.22       | 18.86            |
| 3       | 465.13886 | 465.1389  | 0.09       | 3.55    | 3.63         | 2.79        | 2.83             |
| 4       | 466.1372  | 466.14133 | 8.86       | 0.52    | 0.41         | 0.41        | 0.32             |

--- End Of Report ---

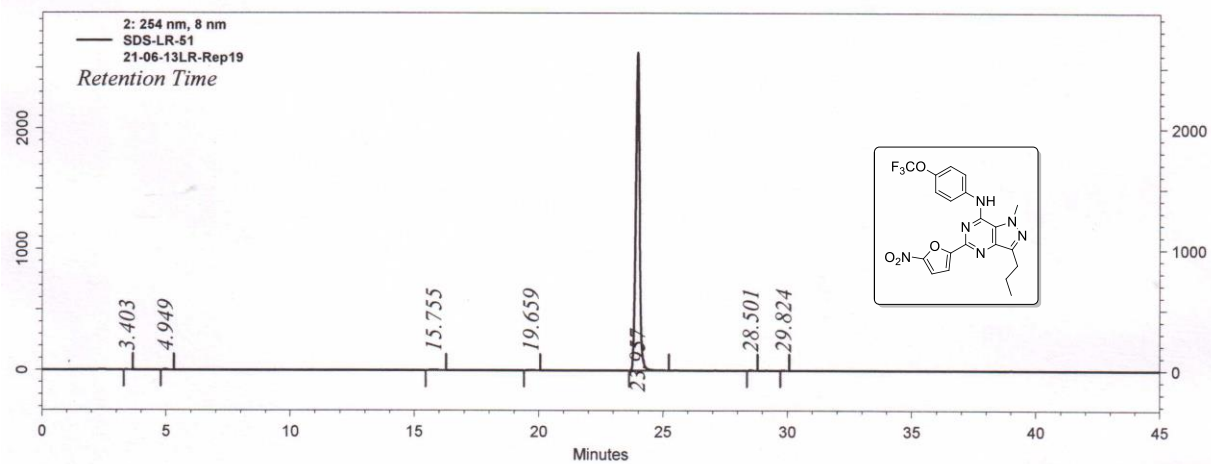

2: 254 nm, 8 nm

| Pk # | Retention Time | Area     | Area % | Height  | Height % |
|------|----------------|----------|--------|---------|----------|
| 1    | 3.403          | 10275    | 0.035  | 1422    | 0.054    |
| 2    | 4.949          | 43431    | 0.148  | 4175    | 0.158    |
| 3    | 15.755         | 41166    | 0.140  | 1944    | 0.074    |
| 4    | 19.659         | 44427    | 0.151  | 2542    | 0.096    |
| 5    | 23.957         | 29155654 | 99.387 | 2628026 | 99.422   |
| 6    | 28.501         | 28367    | 0.097  | 3582    | 0.136    |
| 7    | 29.824         | 12104    | 0.041  | 1610    | 0.061    |

|        |  |          |         |         |         |
|--------|--|----------|---------|---------|---------|
| Totals |  | 29335424 | 100.000 | 2643301 | 100.000 |
|--------|--|----------|---------|---------|---------|

# Compound (38)

<sup>1</sup>H NMR in CDCl<sub>3</sub>

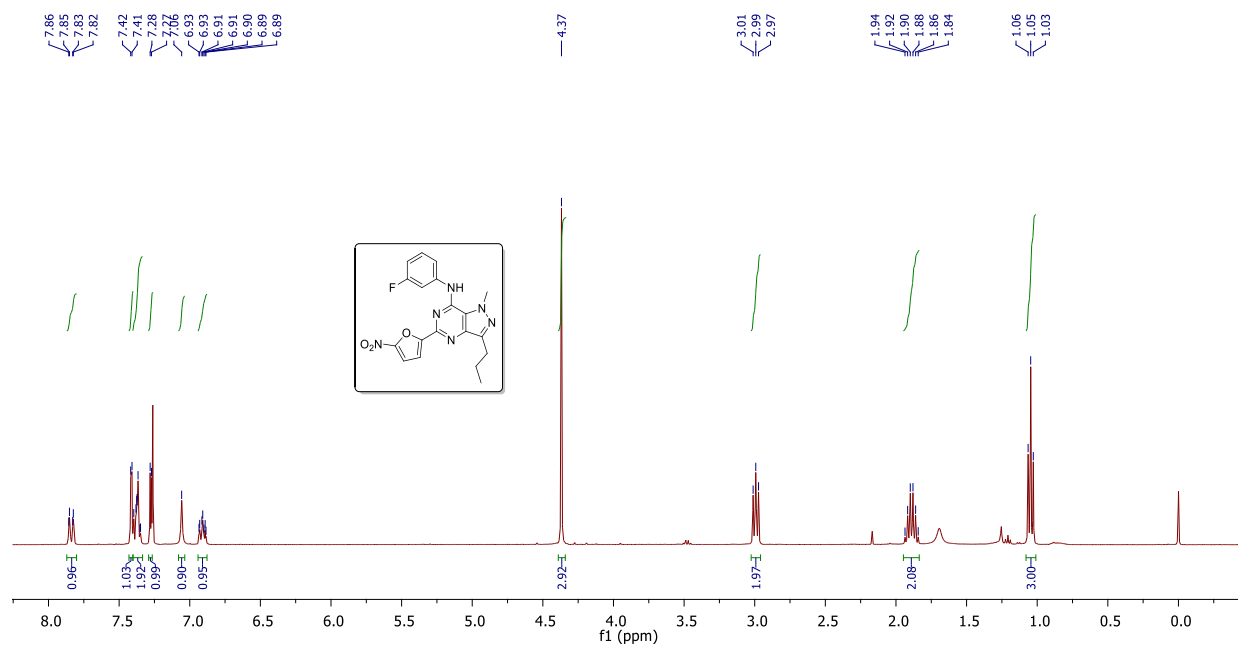

<sup>13</sup>C NMR in Acetone -d<sub>6</sub>

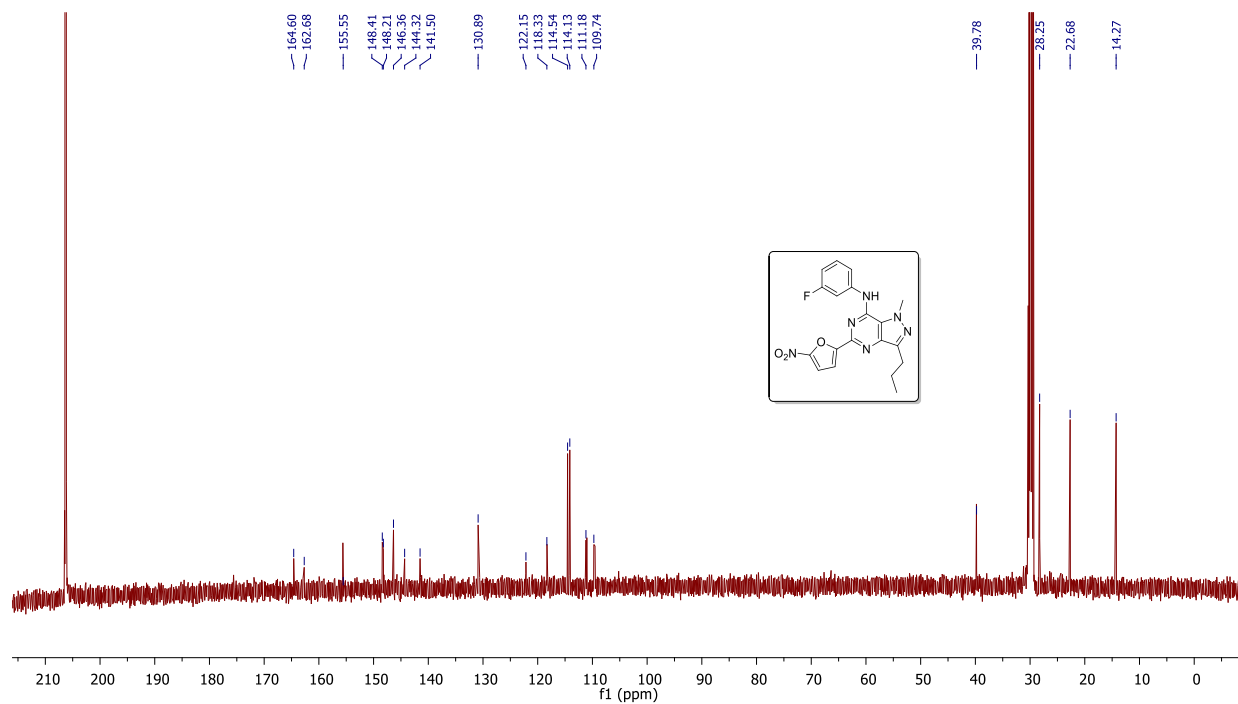



# HRMS

## Qualitative Compound Report

Data File: GLR-4-22.d  
 Sample Type: Sample  
 Instrument Name: Instrument 1  
 Acq Method: 29\_may\_\_positive.m  
 IRM Calibration Status: All Ions Missed  
 Comment:

Sample Name: GLR-4-22  
 Position: 23  
 User Name:  
 Acquired Time: 6/4/2012 2:56:52 PM  
 DA Method: as.m

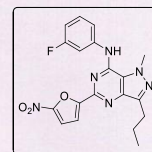

Sample Group: Info.

### Compound Table

| Compound Label          | RT    | Mass      | Formula         | MFG Formula     | MFG Diff (ppm) | DB Formula      |
|-------------------------|-------|-----------|-----------------|-----------------|----------------|-----------------|
| Cpd 91: C19 H17 F N6 O3 | 0.331 | 396.13447 | C19 H17 F N6 O3 | C19 H17 F N6 O3 | 0.38           | C19 H17 F N6 O3 |

| Compound Label          | m/z       | RT    | Algorithm                 | Mass      |
|-------------------------|-----------|-------|---------------------------|-----------|
| Cpd 91: C19 H17 F N6 O3 | 397.14174 | 0.331 | Find by Molecular Feature | 396.13447 |

### MFE MS Spectrum

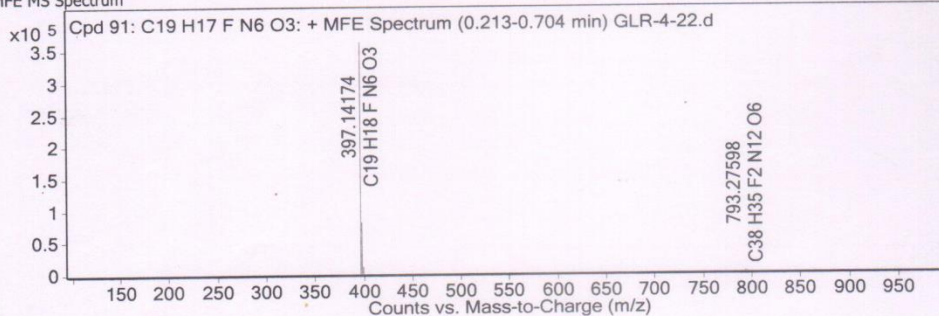

### MS Spectrum Peak List

| m/z       | z | Abund    | Formula           | Ion     |
|-----------|---|----------|-------------------|---------|
| 397.14174 | 1 | 363797.2 | C19 H18 F N6 O3   | (M+H)+  |
| 398.1453  | 1 | 79824.5  | C19 H18 F N6 O3   | (M+H)+  |
| 399.14803 | 1 | 11748    | C19 H18 F N6 O3   | (M+H)+  |
| 793.27598 | 1 | 2116.4   | C38 H35 F2 N12 O6 | (2M+H)+ |
| 794.27897 | 1 | 1080.9   | C38 H35 F2 N12 O6 | (2M+H)+ |
| 795.28384 | 1 | 800.5    | C38 H35 F2 N12 O6 | (2M+H)+ |

### Predicted Isotope Match Table

| Isotope | m/z       | Calc m/z  | Diff (ppm) | Abund % | Calc Abund % | Abund Sum % | Calc Abund Sum % |
|---------|-----------|-----------|------------|---------|--------------|-------------|------------------|
| 1       | 397.14174 | 397.14189 | 0.4        | 100     | 100          | 79.89       | 79.22            |
| 2       | 398.1453  | 398.14468 | -1.57      | 21.94   | 23.06        | 17.53       | 18.27            |
| 3       | 399.14803 | 399.14718 | -2.13      | 3.23    | 3.16         | 2.58        | 2.5              |

--- End Of Report ---

# HPLC

## <Chromatogram>

mAU

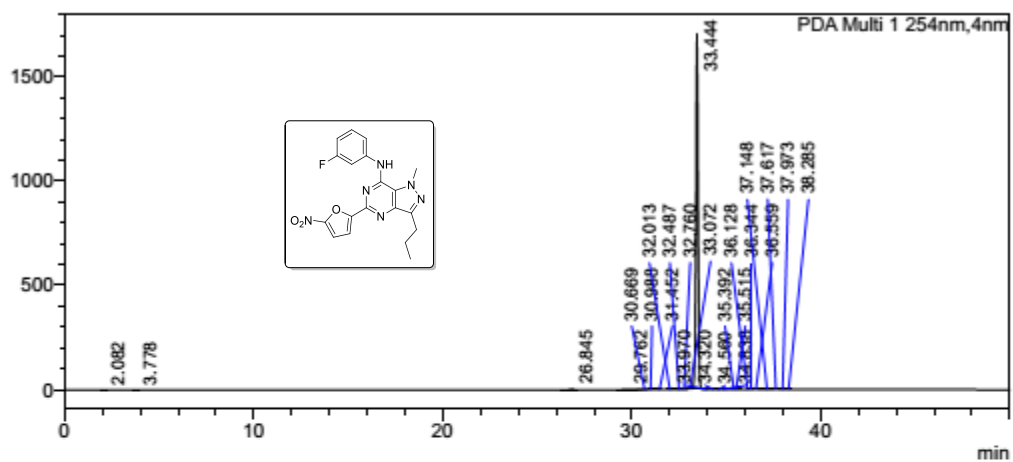

## <Peak Table>

PDA Ch1 254nm

| Peak# | Ret. Time | Area     | Height  | Area%  | Height% |
|-------|-----------|----------|---------|--------|---------|
| 1     | 2.082     | 3740     | 436     | 0.027  | 0.025   |
| 2     | 3.778     | 2496     | 243     | 0.018  | 0.014   |
| 3     | 26.845    | 40589    | 3569    | 0.297  | 0.206   |
| 4     | 29.762    | 39430    | 2519    | 0.288  | 0.145   |
| 5     | 30.669    | 13659    | 971     | 0.100  | 0.056   |
| 6     | 30.988    | 7765     | 519     | 0.057  | 0.030   |
| 7     | 31.452    | 6511     | 448     | 0.048  | 0.026   |
| 8     | 32.013    | 3547     | 297     | 0.026  | 0.017   |
| 9     | 32.487    | 4100     | 445     | 0.030  | 0.026   |
| 10    | 32.760    | 7253     | 797     | 0.053  | 0.046   |
| 11    | 33.072    | 63081    | 7307    | 0.461  | 0.421   |
| 12    | 33.444    | 13378635 | 1705861 | 97.816 | 98.400  |
| 13    | 33.970    | 20411    | 1637    | 0.149  | 0.094   |
| 14    | 34.320    | 7807     | 843     | 0.057  | 0.049   |
| 15    | 34.560    | 2871     | 277     | 0.021  | 0.016   |
| 16    | 34.838    | 6431     | 423     | 0.047  | 0.024   |
| 17    | 35.392    | 7765     | 919     | 0.057  | 0.053   |
| 18    | 35.515    | 10210    | 1183    | 0.075  | 0.068   |
| 19    | 36.128    | 1154     | 145     | 0.008  | 0.008   |
| 20    | 36.344    | 5597     | 654     | 0.041  | 0.038   |
| 21    | 36.559    | 20371    | 1652    | 0.149  | 0.095   |
| 22    | 37.148    | 3433     | 405     | 0.025  | 0.023   |

## Compound (39)

$^1\text{H}$  NMR in  $\text{CDCl}_3$

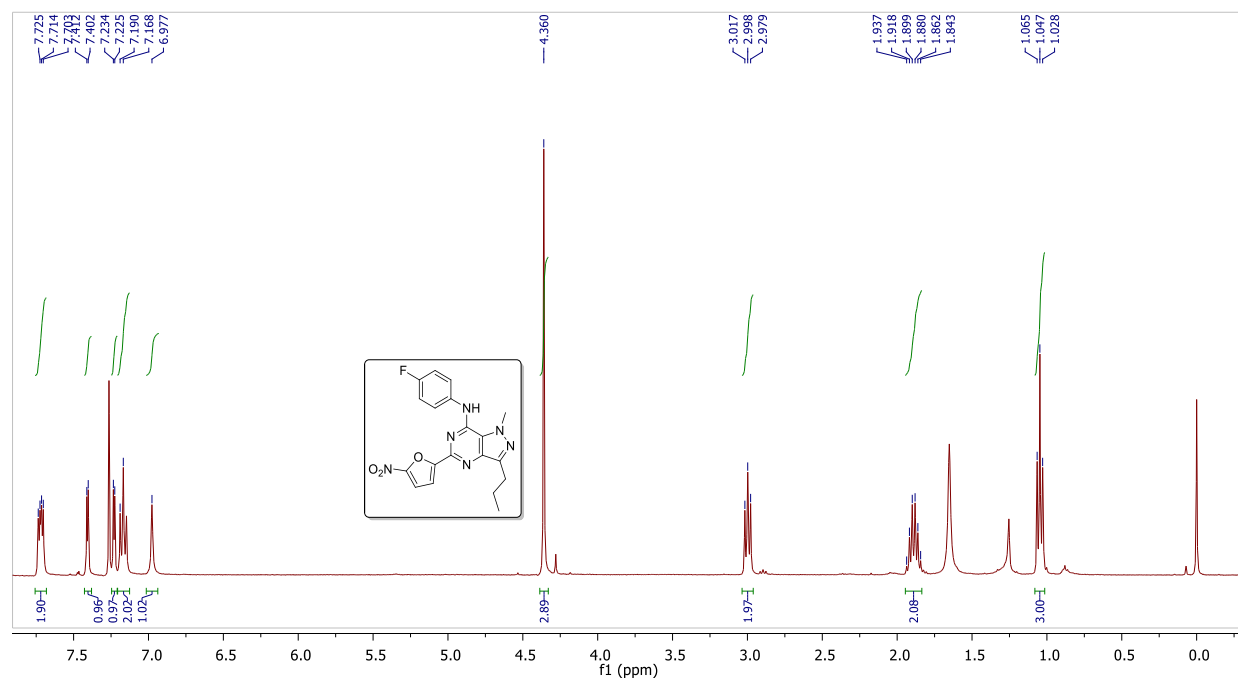

$^{13}\text{C}$  NMR in  $\text{Acetone-d}_6$

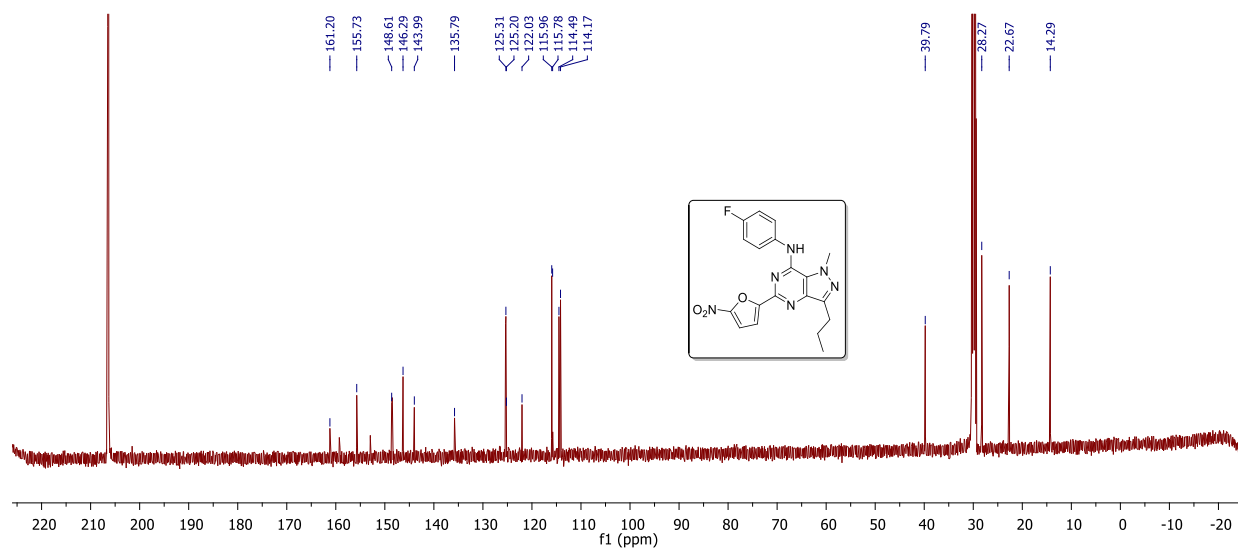

## Qualitative Compound Report

|                        |                   |               |                       |
|------------------------|-------------------|---------------|-----------------------|
| Data File              | GLR-A-20.d        | Sample Name   | GLR-A-20              |
| Sample Type            | Sample            | Position      | Vial 10               |
| Instrument Name        | Instrument 1      | User Name     |                       |
| Acq Method             | vishal_12-01-13.m | Acquired Time | 09-07-2013 PM 1:05:11 |
| IRM Calibration Status | Success           | DA Method     | daily_report.m        |
| Comment                |                   |               |                       |

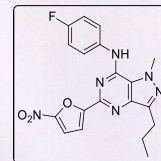

|                |                             |       |
|----------------|-----------------------------|-------|
| Sample Group   |                             | Info. |
| Acquisition SW | 6200 series TOF/6500 series |       |
| Version        | Q-TOF B.05.01 (B5125)       |       |

## Compound Table

| Compound Label         | RT    | Mass     | Formula         | MFG Formula     | MFG Diff (ppm) | DB Formula      |
|------------------------|-------|----------|-----------------|-----------------|----------------|-----------------|
| Cpd 9: C19 H17 F N6 O3 | 0.193 | 396.1344 | C19 H17 F N6 O3 | C19 H17 F N6 O3 | 0.66           | C19 H17 F N6 O3 |

| Compound Label         | m/z      | RT    | Algorithm                 | Mass     |
|------------------------|----------|-------|---------------------------|----------|
| Cpd 9: C19 H17 F N6 O3 | 397.1415 | 0.193 | Find by Molecular Feature | 396.1344 |

## MFE MS Spectrum

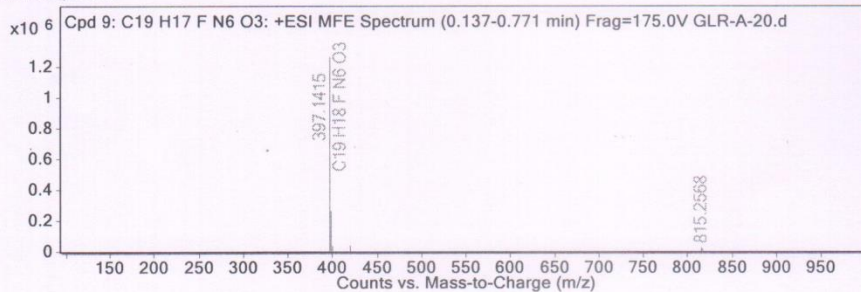

## MS Spectrum Peak List

| m/z      | z | Abund     | Formula            | Ion      |
|----------|---|-----------|--------------------|----------|
| 397.1415 | 1 | 1264502.5 | C19 H18 F N6 O3    | (M+H)+   |
| 398.1448 | 1 | 263032.88 | C19 H18 F N6 O3    | (M+H)+   |
| 399.1468 | 1 | 35780.83  | C19 H18 F N6 O3    | (M+H)+   |
| 400.1491 | 1 | 3477      | C19 H18 F N6 O3    | (M+H)+   |
| 419.1237 | 1 | 33089     | C19 H17 F N6 Na O3 | (M+Na)+  |
| 420.126  | 1 | 8806.8    | C19 H17 F N6 Na O3 | (M+Na)+  |
| 421.1289 | 1 | 1259.4    | C19 H17 F N6 Na O3 | (M+Na)+  |
| 815.2568 | 1 | 23681.71  |                    | (2M+Na)+ |
| 816.2599 | 1 | 11912.44  |                    | (2M+Na)+ |
| 817.2607 | 1 | 3235.56   |                    | (2M+Na)+ |

## Predicted Isotope Match Table

| Isotope | m/z      | Calc m/z | Diff (ppm) | Abund % | Calc Abund % | Abund Sum % | Calc Abund Sum % |
|---------|----------|----------|------------|---------|--------------|-------------|------------------|
| 1       | 397.1415 | 397.1419 | 0.88       | 100     | 100          | 80.71       | 79.02            |
| 2       | 398.1448 | 398.1447 | -0.41      | 20.8    | 23.06        | 16.79       | 18.23            |
| 3       | 399.1468 | 399.1472 | 0.89       | 2.83    | 3.16         | 2.28        | 2.5              |
| 4       | 400.1491 | 400.1496 | 1.18       | 0.27    | 0.32         | 0.22        | 0.25             |

--- End Of Report ---

# HPLC

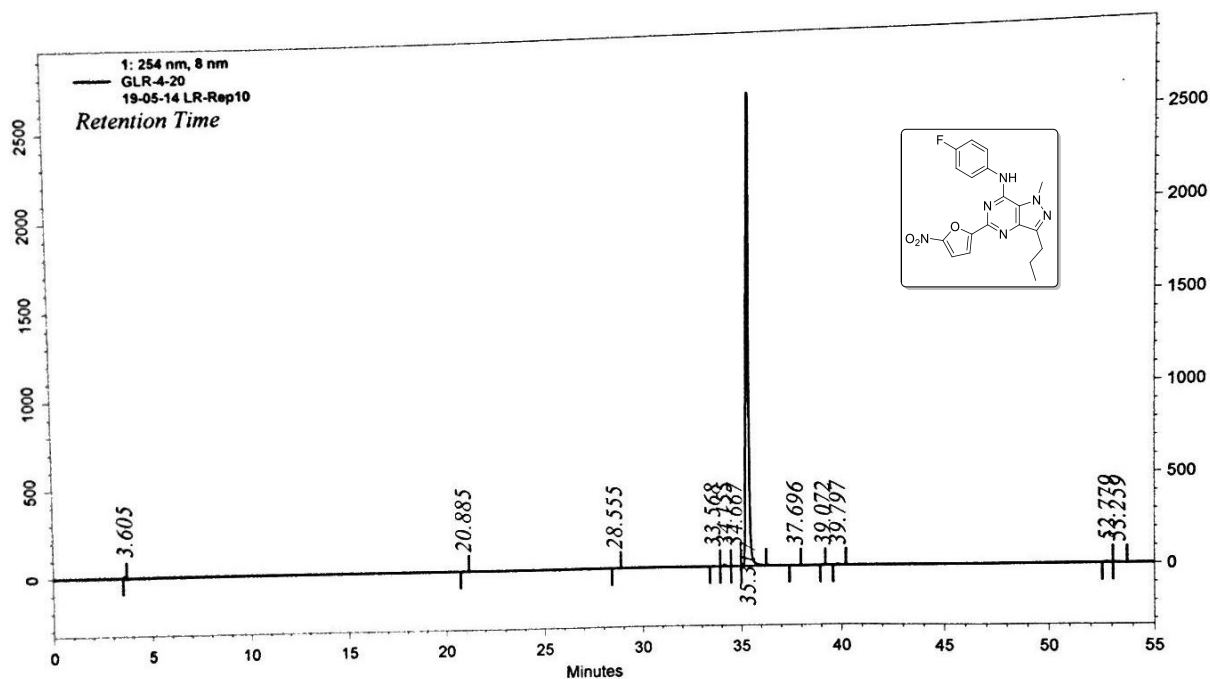

1: 254 nm, 8 nm

| Pk # | Retention Time | Area     | Area % | Height  | Height % |
|------|----------------|----------|--------|---------|----------|
| 1    | 3.605          | 53859    | 0.224  | 12696   | 0.476    |
| 2    | 20.885         | 17322    | 0.072  | 1864    | 0.070    |
| 3    | 28.555         | 11566    | 0.048  | 1126    | 0.042    |
| 4    | 33.568         | 26433    | 0.110  | 2320    | 0.087    |
| 5    | 34.155         | 84278    | 0.350  | 9090    | 0.341    |
| 6    | 34.667         | 30599    | 0.127  | 3001    | 0.112    |
| 7    | 35.317         | 23700456 | 98.533 | 2627329 | 98.473   |
| 8    | 37.696         | 20651    | 0.086  | 1311    | 0.049    |
| 9    | 39.072         | 12697    | 0.053  | 1826    | 0.068    |
| 10   | 39.797         | 38574    | 0.160  | 3617    | 0.136    |
| 11   | 52.779         | 35728    | 0.149  | 2961    | 0.111    |
| 12   | 53.259         | 21219    | 0.088  | 918     | 0.034    |

|        |  |          |         |         |         |
|--------|--|----------|---------|---------|---------|
| Totals |  | 24053382 | 100.000 | 2668059 | 100.000 |
|--------|--|----------|---------|---------|---------|

# Compound (40)

<sup>1</sup>H NMR in CDCl<sub>3</sub>

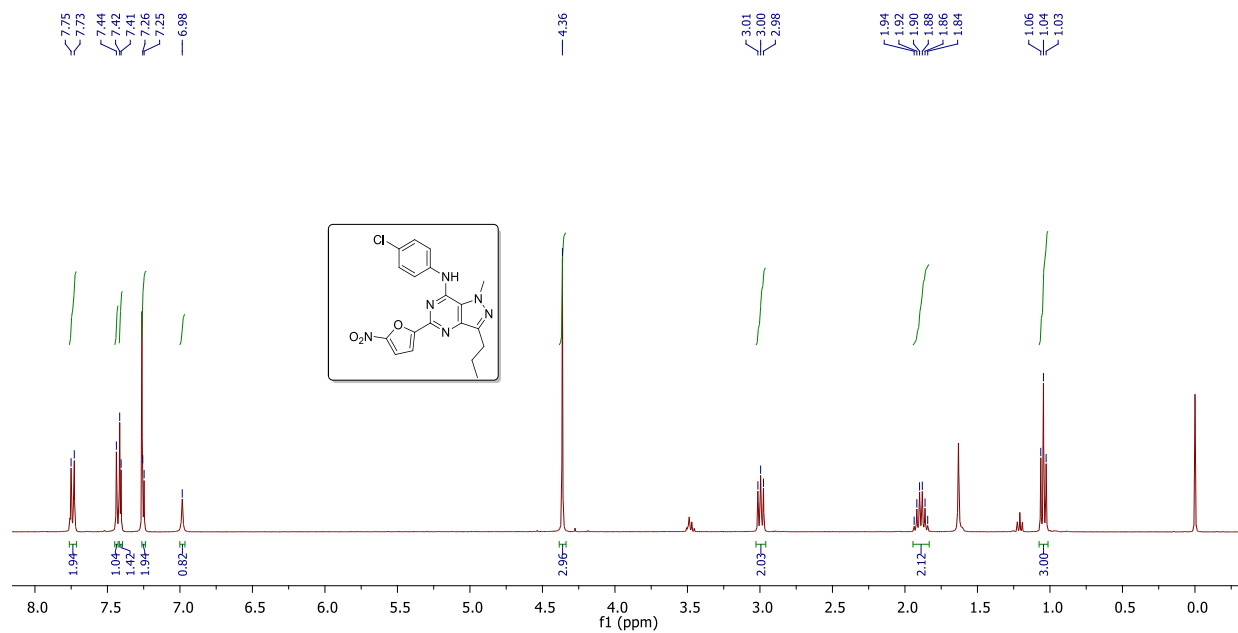

<sup>13</sup>C NMR in CDCl<sub>3</sub>

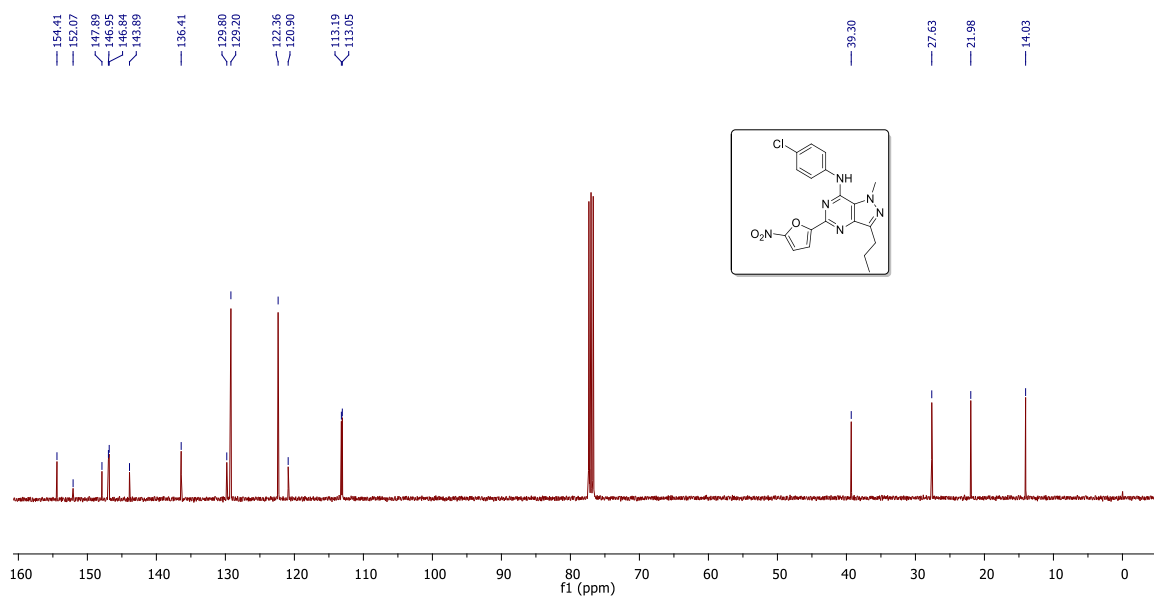



## Qualitative Compound Report

Data File GLR-4-41.d  
Sample GLR-4-41  
Instrument Name Vial 11  
Acq Method vishal\_MS\_25072012.m  
IRM Calibration Status Success  
Comment

Sample Name GLR-4-41  
Position Vial 11  
User Name  
Acquired Time 11/19/2012 1:12:13 PM  
DA Method as.m

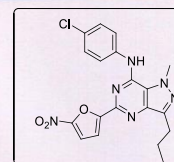

Sample Group Info.

| Compound Label          | RT    | Mass      | Formula          | MFG Formula      | MFG Diff (ppm) | DB Formula       |
|-------------------------|-------|-----------|------------------|------------------|----------------|------------------|
| Cpd 5: C19 H17 Cl N6 O3 | 0.172 | 412.10463 | C19 H17 Cl N6 O3 | C19 H17 Cl N6 O3 | 1.05           | C19 H17 Cl N6 O3 |

| Compound Label          | m/z       | RT    | Algorithm                 | Mass      |
|-------------------------|-----------|-------|---------------------------|-----------|
| Cpd 5: C19 H17 Cl N6 O3 | 413.11194 | 0.172 | Find by Molecular Feature | 412.10463 |

MFE MS Spectrum

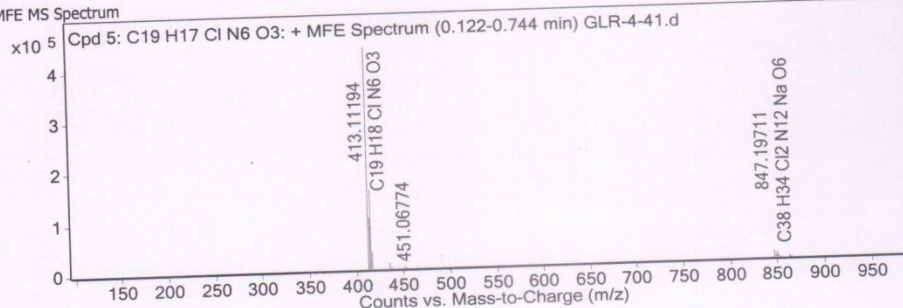

MS Spectrum Peak List

| m/z       | z | Abund    | Formula               | Ion      |
|-----------|---|----------|-----------------------|----------|
| 413.11194 | 1 | 438276.4 | C19 H18 Cl N6 O3      | (M+H)+   |
| 414.11451 | 1 | 103107   | C19 H18 Cl N6 O3      | (M+H)+   |
| 415.10911 | 1 | 155445.3 | C19 H18 Cl N6 O3      | (M+H)+   |
| 416.112   | 1 | 33909.6  | C19 H18 Cl N6 O3      | (M+H)+   |
| 435.0923  | 1 | 10911.2  | C19 H17 Cl N6 Na O3   | (M+Na)+  |
| 451.06774 | 1 | 4673.1   |                       | (M+K)+   |
| 847.19711 | 1 | 14619.5  | C38 H34 Cl2 N12 Na O6 | (2M+Na)+ |
| 848.20076 | 1 | 7708.6   | C38 H34 Cl2 N12 Na O6 | (2M+Na)+ |
| 849.19455 | 1 | 11221.8  | C38 H34 Cl2 N12 Na O6 | (2M+Na)+ |
| 850.19643 | 1 | 5989.8   | C38 H34 Cl2 N12 Na O6 | (2M+Na)+ |

Predicted Isotope Match Table

| Isotope | m/z       | Calc m/z  | Diff (ppm) | Abund % | Calc Abund % | Abund Sum % | Calc Abund Sum % |
|---------|-----------|-----------|------------|---------|--------------|-------------|------------------|
| 1       | 413.11194 | 413.11234 | 0.98       | 100     | 100          | 59.69       | 59.9             |
| 2       | 414.11451 | 414.11513 | 1.5        | 23.53   | 23.06        | 14.04       | 13.81            |
| 3       | 415.10911 | 415.11013 | 2.47       | 35.47   | 35.16        | 21.17       | 21.06            |
| 4       | 416.112   | 416.11251 | 1.22       | 7.74    | 7.7          | 4.62        | 4.61             |
| 5       | 417.11398 | 417.11487 | 2.14       | 0.8     | 1.04         | 0.48        | 0.62             |

# HPLC

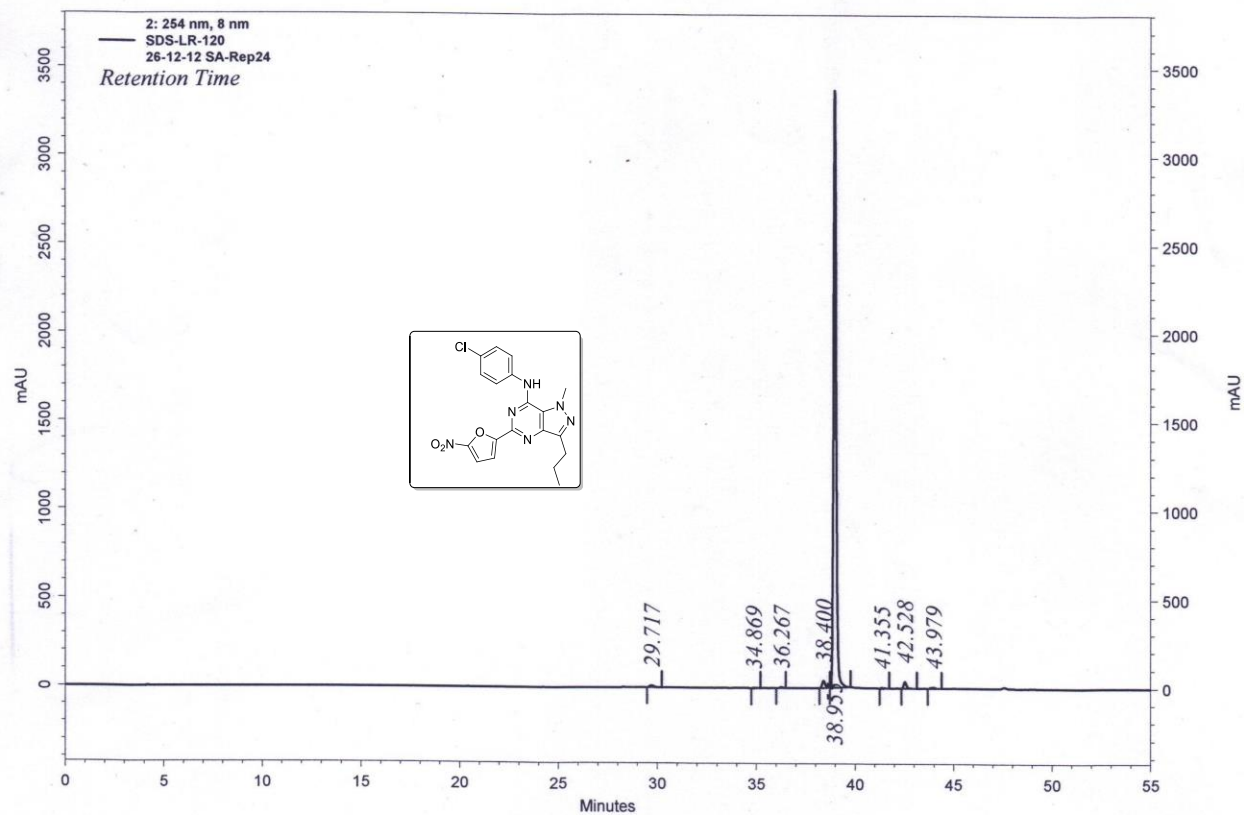

2: 254 nm, 8 nm

| Pk # | Retention Time | Area     | Area % | Height  | Height % |
|------|----------------|----------|--------|---------|----------|
| 1    | 29.717         | 159938   | 0.481  | 10193   | 0.293    |
| 2    | 34.869         | 54308    | 0.163  | 3676    | 0.106    |
| 3    | 36.267         | 58969    | 0.177  | 5863    | 0.168    |
| 4    | 38.400         | 419656   | 1.262  | 40408   | 1.161    |
| 5    | 38.955         | 32051096 | 96.407 | 3374215 | 96.911   |
| 6    | 41.355         | 51231    | 0.154  | 4495    | 0.129    |
| 7    | 42.528         | 352296   | 1.060  | 36584   | 1.051    |
| 8    | 43.979         | 98070    | 0.295  | 6330    | 0.182    |

|        |  |          |         |         |         |
|--------|--|----------|---------|---------|---------|
| Totals |  | 33245564 | 100.000 | 3481764 | 100.000 |
|--------|--|----------|---------|---------|---------|

# Compound (41)

<sup>1</sup>H NMR in CDCl<sub>3</sub>

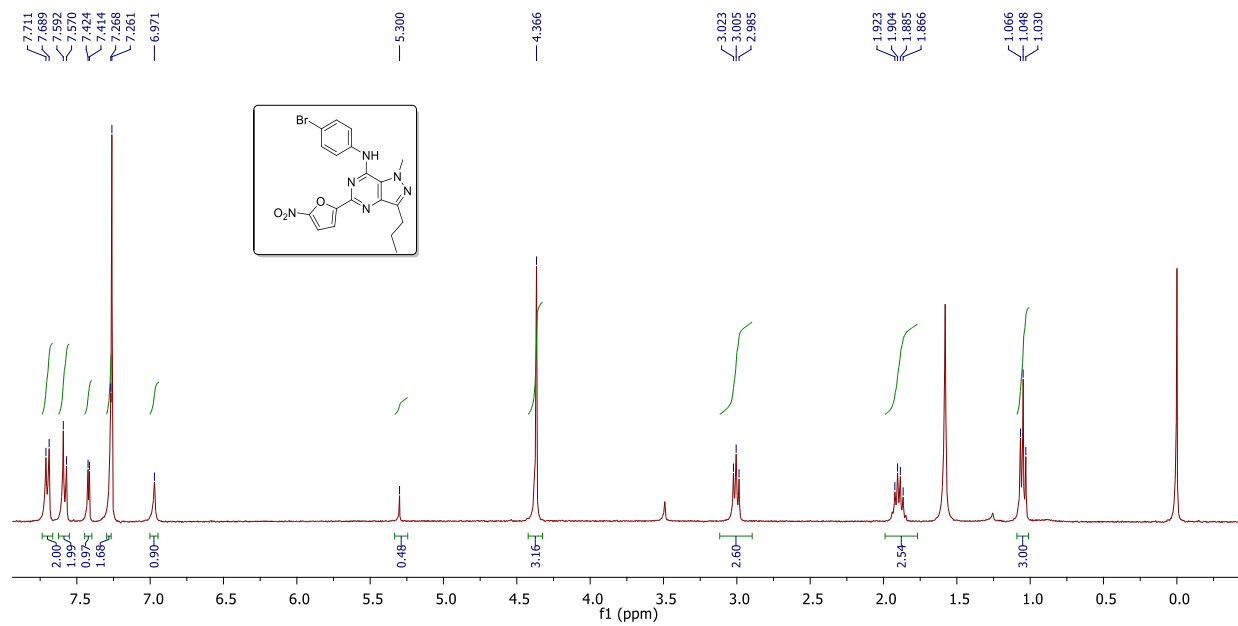

<sup>13</sup>C NMR in CDCl<sub>3</sub>

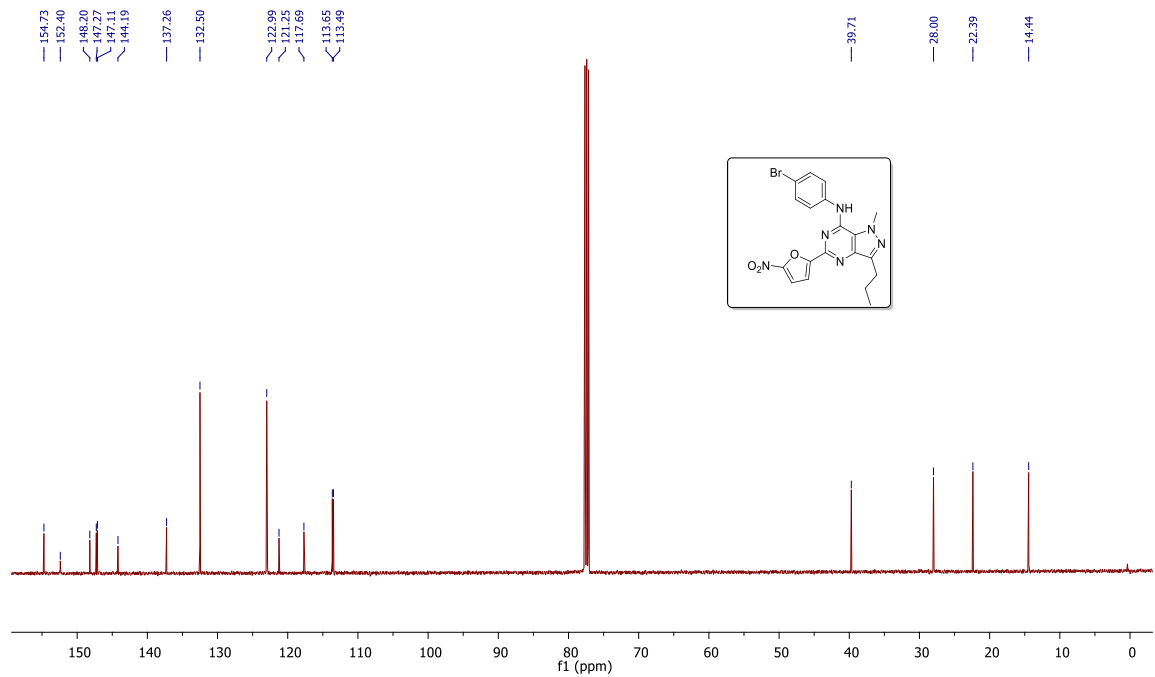



## Qualitative Compound Report

**Data File** GLR-4-40.d  
**Sample Type** Sample  
**Instrument Name** Instrument 1  
**Acq Method** vishal\_MS\_25072012.m  
**IRM Calibration Status** Success  
**Comment**  
**Sample Name** GLR-4-40  
**Position** Vial 10  
**User Name**  
**Acquired Time** 11/19/2012 1:05:07 PM  
**DA Method** as.m

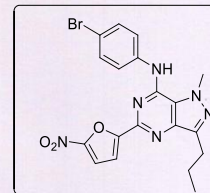

**Sample Group** Info.

## Compound Table

| Compound Label          | RT    | Mass      | Formula          | MFG Formula      | MFG Diff (ppm) | DB Formula       |
|-------------------------|-------|-----------|------------------|------------------|----------------|------------------|
| Cpd 5: C19 H17 Br N6 O3 | 0.173 | 456.05368 | C19 H17 Br N6 O3 | C19 H17 Br N6 O3 | 1.91           | C19 H17 Br N6 O3 |

| Compound Label          | m/z       | RT    | Algorithm                 | Mass      |
|-------------------------|-----------|-------|---------------------------|-----------|
| Cpd 5: C19 H17 Br N6 O3 | 457.06101 | 0.173 | Find by Molecular Feature | 456.05368 |

## MFE MS Spectrum

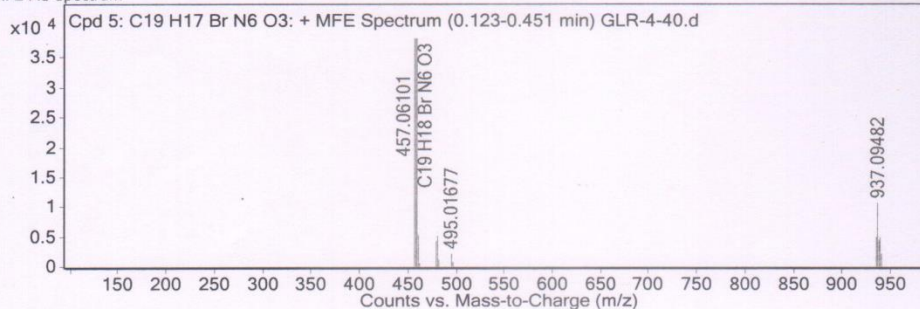

## MS Spectrum Peak List

| m/z       | z | Abund    | Formula             | Ion      |
|-----------|---|----------|---------------------|----------|
| 457.06101 | 1 | 160124.5 | C19 H18 Br N6 O3    | (M+H)+   |
| 458.06399 | 1 | 38239.7  | C19 H18 Br N6 O3    | (M+H)+   |
| 459.05908 | 1 | 157646.4 | C19 H18 Br N6 O3    | (M+H)+   |
| 460.06201 | 1 | 35501.4  | C19 H18 Br N6 O3    | (M+H)+   |
| 461.06331 | 1 | 5224.2   | C19 H18 Br N6 O3    | (M+H)+   |
| 481.03964 | 1 | 5088.1   | C19 H17 Br N6 Na O3 | (M+Na)+  |
| 935.09612 | 1 | 4998.8   |                     | (2M+Na)+ |
| 937.09482 | 1 | 10595    |                     | (2M+Na)+ |
| 938.09518 | 1 | 4493.5   |                     | (2M+Na)+ |
| 939.09344 | 1 | 4989.1   |                     | (2M+Na)+ |

## Predicted Isotope Match Table

| Isotope | m/z       | Calc m/z  | Diff (ppm) | Abund % | Calc Abund % | Abund Sum % | Calc Abund Sum % |
|---------|-----------|-----------|------------|---------|--------------|-------------|------------------|
| 1       | 457.06101 | 457.06183 | 1.78       | 100     | 99.56        | 40.29       | 40.05            |
| 2       | 458.06399 | 458.06461 | 1.37       | 23.88   | 22.96        | 9.62        | 9.24             |
| 3       | 459.05908 | 459.06001 | 2.04       | 98.45   | 100          | 39.67       | 40.23            |
| 4       | 460.06201 | 460.06266 | 1.43       | 22.17   | 22.66        | 8.93        | 9.11             |
| 5       | 461.06331 | 461.06512 | 3.94       | 3.26    | 3.09         | 1.31        | 1.24             |
| 6       | 462.06645 | 462.06753 | 2.34       | 0.41    | 0.31         | 0.17        | 0.13             |

--- End Of Report ---

# HPLC

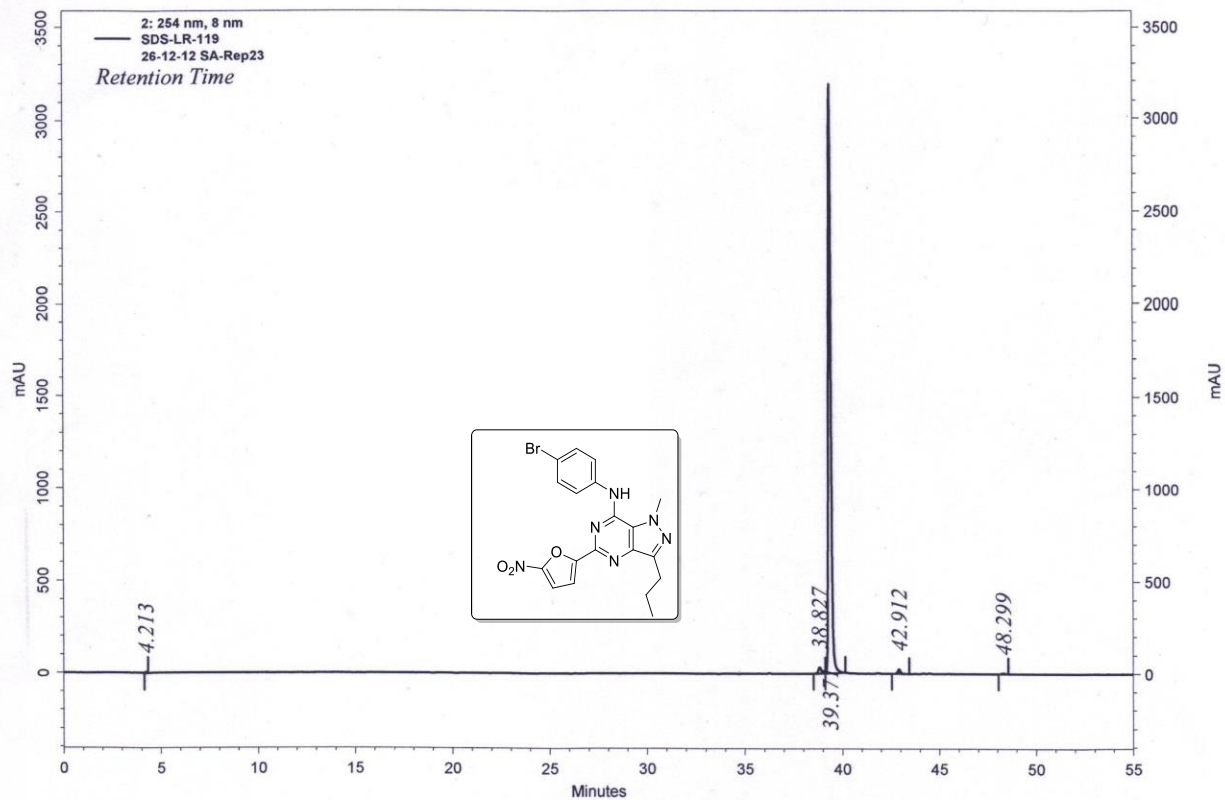

2: 254 nm, 8 nm

| Pk # | Retention Time | Area     | Area % | Height  | Height % |
|------|----------------|----------|--------|---------|----------|
| 1    | 4.213          | 59426    | 0.196  | 9571    | 0.294    |
| 2    | 38.827         | 368153   | 1.216  | 33966   | 1.043    |
| 3    | 39.371         | 29531137 | 97.536 | 3184158 | 97.753   |
| 4    | 42.912         | 252611   | 0.834  | 25108   | 0.771    |
| 5    | 48.299         | 65846    | 0.217  | 4560    | 0.140    |

|        |  |          |         |         |         |
|--------|--|----------|---------|---------|---------|
| Totals |  | 30277173 | 100.000 | 3257363 | 100.000 |
|--------|--|----------|---------|---------|---------|

# Compound (42)

<sup>1</sup>H NMR in CDCl<sub>3</sub>

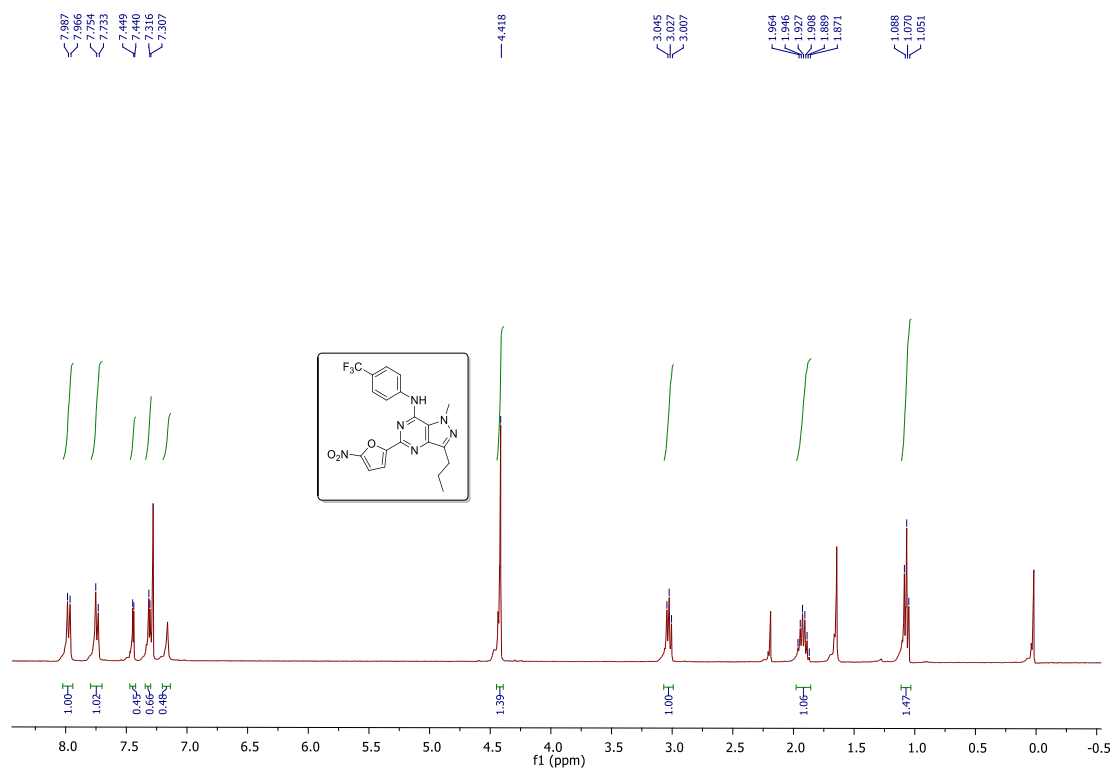

<sup>13</sup>C NMR in DMSO-d<sub>6</sub>

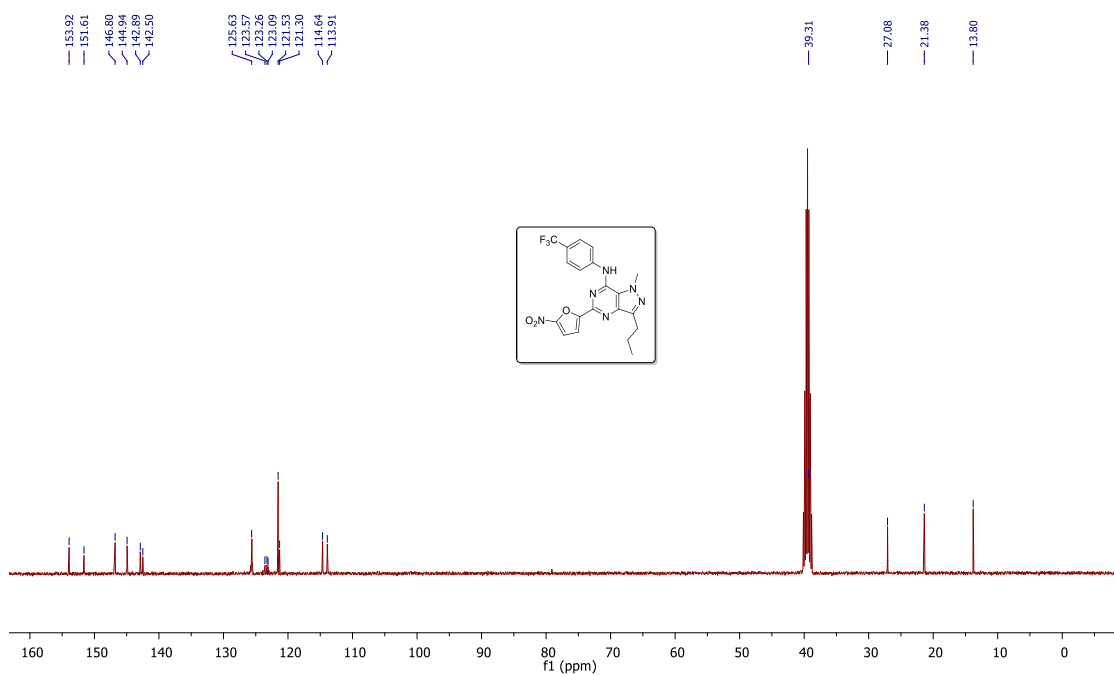



## HRMS

## Qualitative Compound Report

|                               |                      |                      |                        |
|-------------------------------|----------------------|----------------------|------------------------|
| <b>Data File</b>              | GLR-4-17.d           | <b>Sample Name</b>   | GLR-4-17               |
| <b>Sample Type</b>            | Sample               | <b>Position</b>      | Vial 3                 |
| <b>Instrument Name</b>        | Instrument 1         | <b>User Name</b>     |                        |
| <b>Acq Method</b>             | vishal_MS_25072012.m | <b>Acquired Time</b> | 11/19/2012 12:33:11 PM |
| <b>IRM Calibration Status</b> | Success              | <b>DA Method</b>     | as.m                   |
| <b>Comment</b>                |                      |                      |                        |

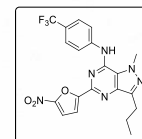

Sample Group Info.

## Compound Table

| Compound Label          | RT    | Mass      | Formula          | MFG Formula      | MFG Diff (ppm) | DB Formula       |
|-------------------------|-------|-----------|------------------|------------------|----------------|------------------|
| Cpd 6: C20 H17 F3 N6 O3 | 0.172 | 446.13095 | C20 H17 F3 N6 O3 | C20 H17 F3 N6 O3 | 1.05           | C20 H17 F3 N6 O3 |

| Compound Label          | m/z       | RT    | Algorithm                 | Mass      |
|-------------------------|-----------|-------|---------------------------|-----------|
| Cpd 6: C20 H17 F3 N6 O3 | 447.13824 | 0.172 | Find by Molecular Feature | 446.13095 |

## MFE MS Spectrum

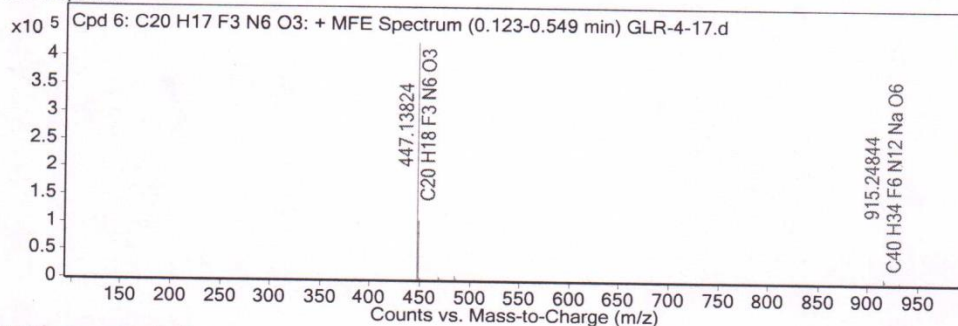

## MS Spectrum Peak List

| m/z       | z | Abund    | Formula              | Ion      |
|-----------|---|----------|----------------------|----------|
| 447.13824 | 1 | 427502.1 | C20 H18 F3 N6 O3     | (M+H)+   |
| 448.14049 | 1 | 106718   | C20 H18 F3 N6 O3     | (M+H)+   |
| 449.14344 | 1 | 15102.1  | C20 H18 F3 N6 O3     | (M+H)+   |
| 450.14326 | 1 | 1907.9   | C20 H18 F3 N6 O3     | (M+H)+   |
| 469.11917 | 1 | 5028.1   | C20 H17 F3 N6 Na O3  | (M+Na)+  |
| 485.09308 | 1 | 6205.8   | C20 H17 F3 K N6 O3   | (M+K)+   |
| 486.09766 | 1 | 2048.1   | C20 H17 F3 K N6 O3   | (M+K)+   |
| 915.24844 | 1 | 9625.8   | C40 H34 F6 N12 Na O6 | (2M+Na)+ |
| 916.25487 | 1 | 4850.3   | C40 H34 F6 N12 Na O6 | (2M+Na)+ |
| 931.22519 | 1 | 1870.5   | C40 H34 F6 K N12 O6  | (2M+K)+  |

## Predicted Isotope Match Table

| Isotope | m/z       | Calc m/z  | Diff (ppm) | Abund % | Calc Abund % | Abund Sum % | Calc Abund Sum % |
|---------|-----------|-----------|------------|---------|--------------|-------------|------------------|
| 1       | 447.13824 | 447.1387  | 1.03       | 100     | 100          | 77.55       | 78.18            |
| 2       | 448.14049 | 448.14151 | 2.27       | 24.96   | 24.14        | 19.36       | 18.88            |
| 3       | 449.14344 | 449.14405 | 1.34       | 3.53    | 3.41         | 2.74        | 2.67             |
| 4       | 450.14326 | 450.1465  | 7.21       | 0.45    | 0.35         | 0.35        | 0.28             |

--- End Of Report ---

# HPLC

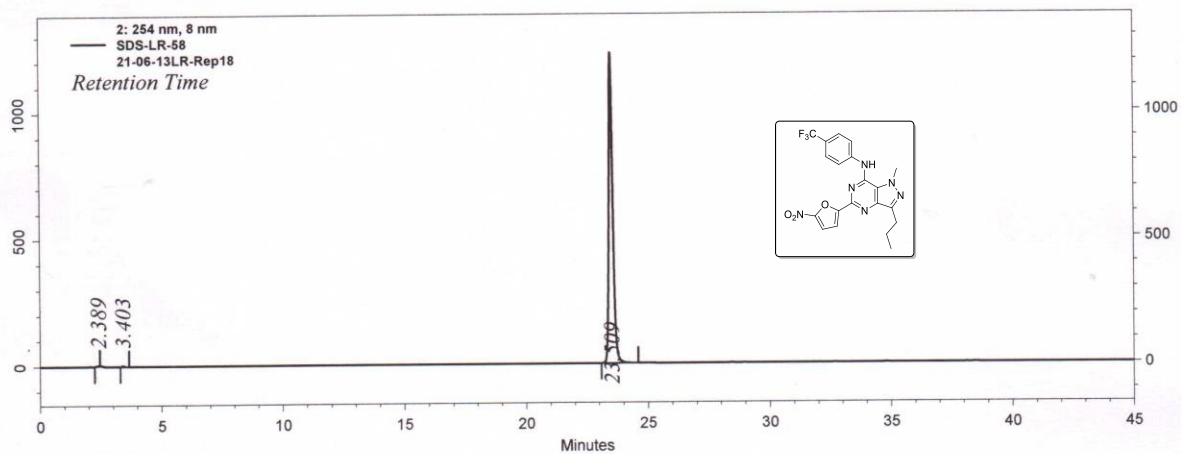

2: 254 nm, 8 nm

| Pk #   | Retention Time | Area     | Area %  | Height  | Height % |
|--------|----------------|----------|---------|---------|----------|
| 1      | 2.389          | 11776    | 0.082   | 1483    | 0.120    |
| 2      | 3.403          | 17683    | 0.124   | 2485    | 0.201    |
| 3      | 23.509         | 14268912 | 99.794  | 1230948 | 99.679   |
| Totals |                | 14298371 | 100.000 | 1234916 | 100.000  |

# Compound (43)

<sup>1</sup>H NMR in CDCl<sub>3</sub>

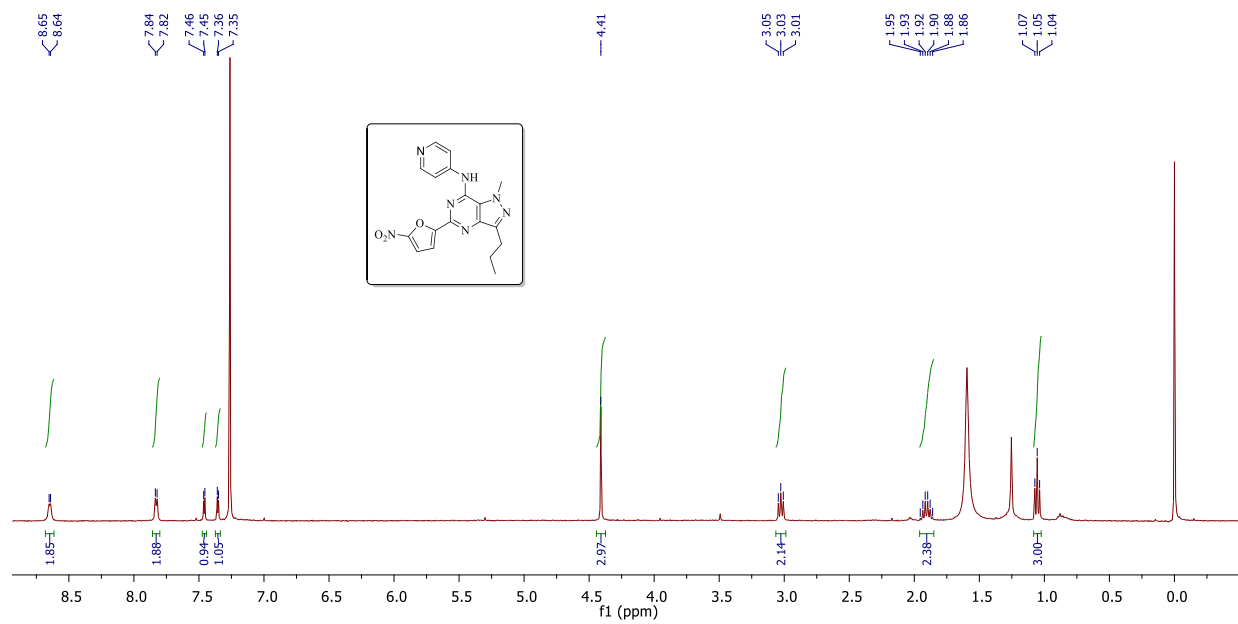

<sup>13</sup>C NMR in DMSO-d<sub>6</sub>

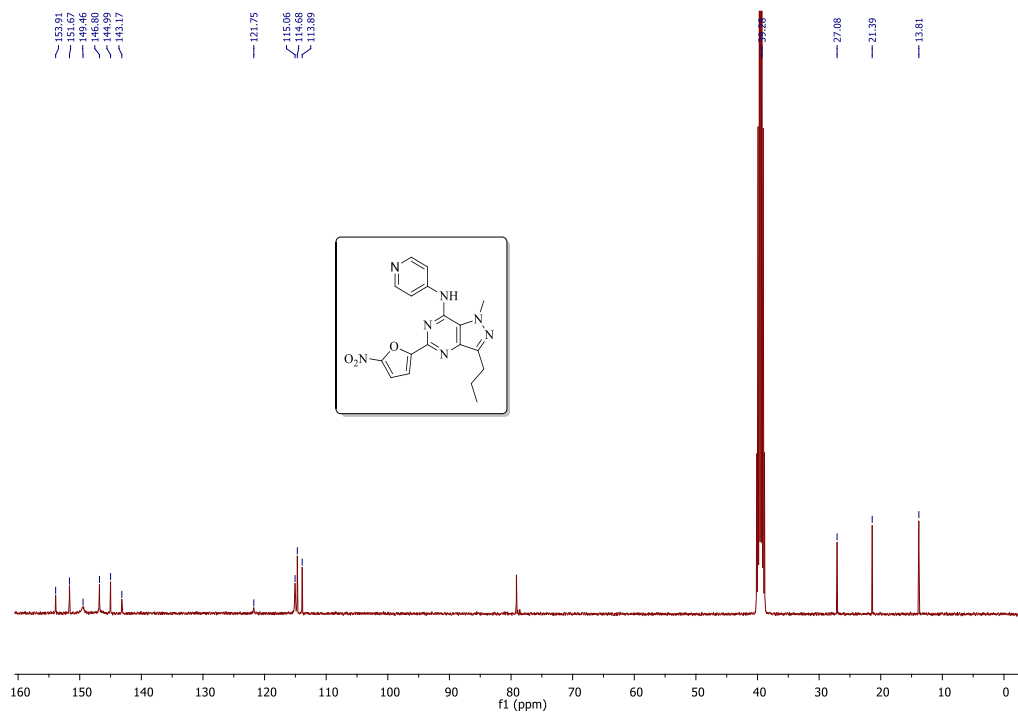

## Qualitative Compound Report

|                               |                      |                      |                        |
|-------------------------------|----------------------|----------------------|------------------------|
| <b>Data File</b>              | GLR-4-35.d           | <b>Sample Name</b>   | GLR-4-35               |
| <b>Sample Type</b>            | Sample               | <b>Position</b>      | Vial 6                 |
| <b>Instrument Name</b>        | Instrument 1         | <b>User Name</b>     |                        |
| <b>Acq Method</b>             | vishal_MS_25072012.m | <b>Acquired Time</b> | 11/19/2012 12:47:24 PM |
| <b>IRM Calibration Status</b> | Success              | <b>DA Method</b>     | as.m                   |
| <b>Comment</b>                |                      |                      |                        |

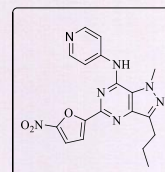

Sample Group      Info.

## Compound Table

| Compound Label       | RT    | Mass      | Formula       | MFG Formula   | MFG Diff (ppm) | DB Formula    |
|----------------------|-------|-----------|---------------|---------------|----------------|---------------|
| Cpd 7: C18 H17 N7 O3 | 0.173 | 379.13889 | C18 H17 N7 O3 | C18 H17 N7 O3 | 1.05           | C18 H17 N7 O3 |

| Compound Label       | m/z       | RT    | Algorithm                 | Mass      |
|----------------------|-----------|-------|---------------------------|-----------|
| Cpd 7: C18 H17 N7 O3 | 380.14617 | 0.173 | Find by Molecular Feature | 379.13889 |

## MFE MS Spectrum

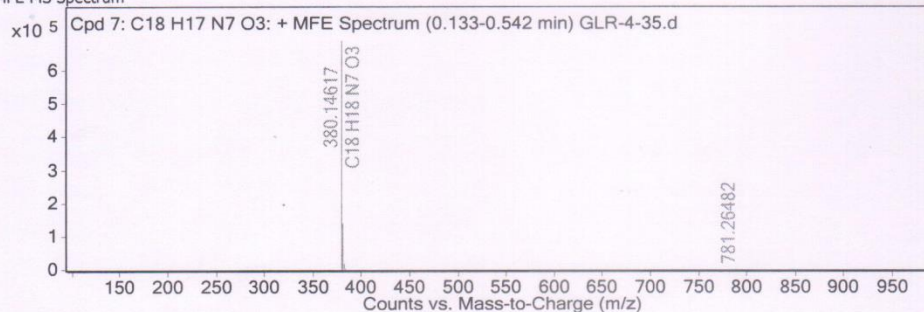

## MS Spectrum Peak List

| m/z       | z | Abund    | Formula          | Ion      |
|-----------|---|----------|------------------|----------|
| 380.14617 | 1 | 689556.9 | C18 H18 N7 O3    | (M+H)+   |
| 381.14848 | 1 | 137491.3 | C18 H18 N7 O3    | (M+H)+   |
| 382.15117 | 1 | 17561.8  | C18 H18 N7 O3    | (M+H)+   |
| 383.15339 | 1 | 2329.3   | C18 H18 N7 O3    | (M+H)+   |
| 402.12775 | 1 | 1510.2   | C18 H17 N7 Na O3 | (M+Na)+  |
| 418.1014  | 1 | 1363.8   | C18 H17 K N7 O3  | (M+K)+   |
| 781.26482 | 1 | 1389.7   |                  | (2M+Na)+ |
| 782.26457 | 1 | 910.2    |                  | (2M+Na)+ |

## Predicted Isotope Match Table

| Isotope | m/z       | Calc m/z  | Diff (ppm) | Abund % | Calc Abund % | Abund Sum % | Calc Abund Sum % |
|---------|-----------|-----------|------------|---------|--------------|-------------|------------------|
| 1       | 380.14617 | 380.14656 | 1.04       | 100     | 100          | 81.42       | 79.59            |
| 2       | 381.14848 | 381.14923 | 1.95       | 19.94   | 22.35        | 16.23       | 17.79            |
| 3       | 382.15117 | 382.15164 | 1.23       | 2.55    | 3            | 2.07        | 2.39             |
| 4       | 383.15339 | 383.15399 | 1.57       | 0.34    | 0.3          | 0.28        | 0.24             |

--- End Of Report ---



# HPLC

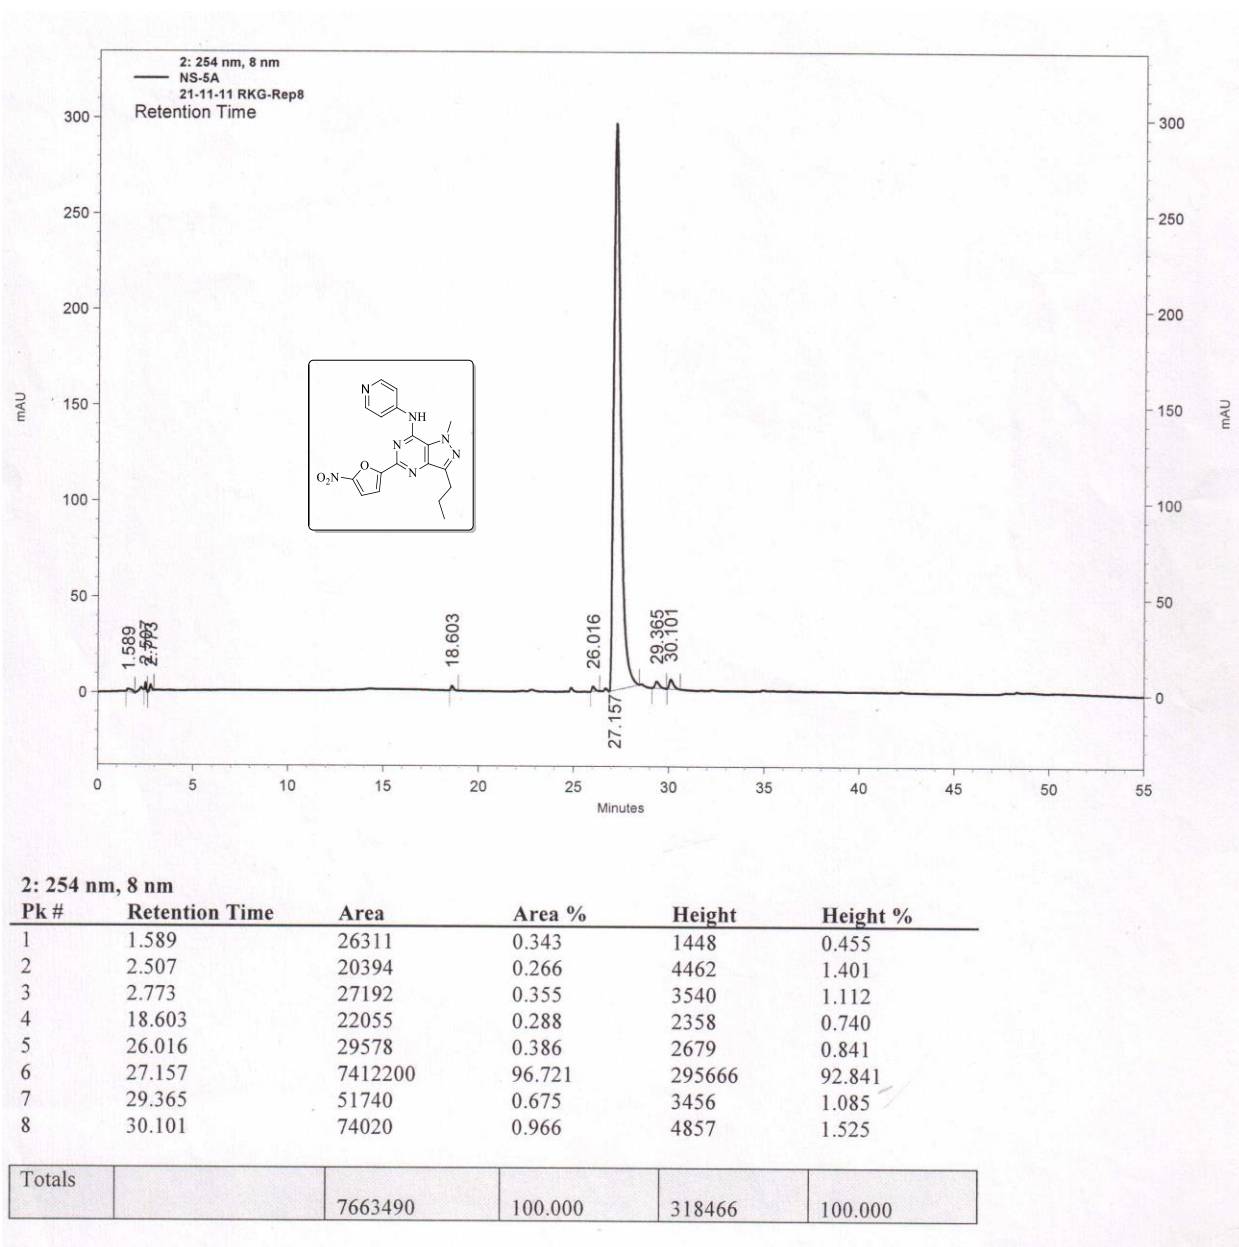

# Compound (44)

## <sup>1</sup>H NMR in DMSO-d<sub>6</sub>

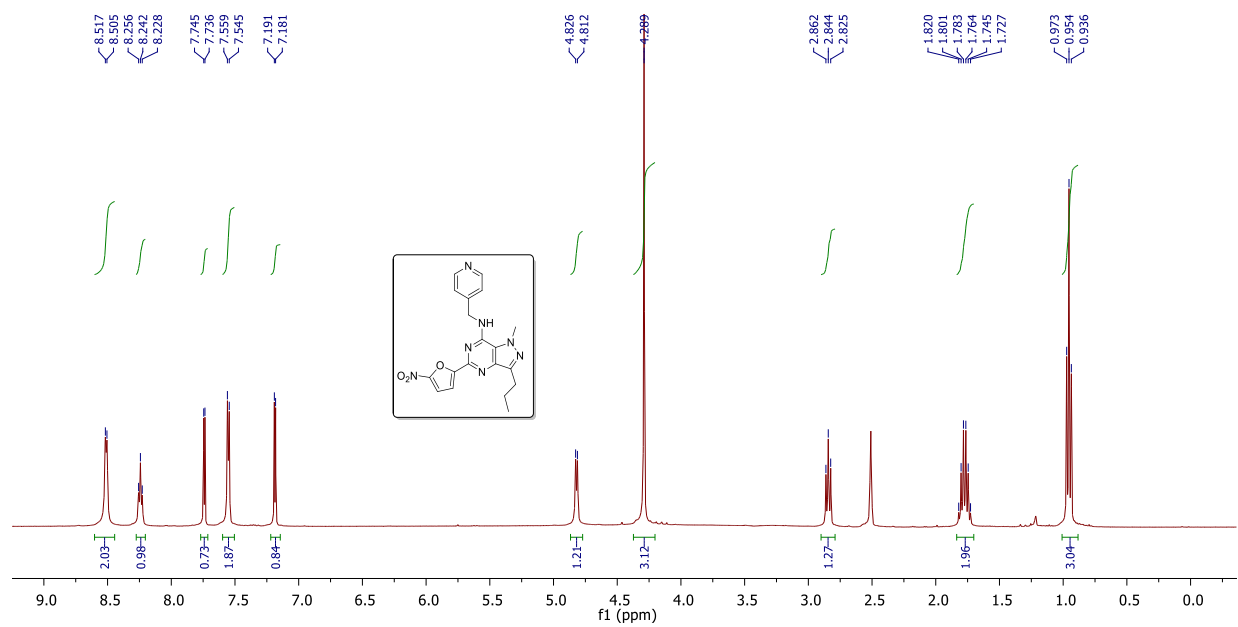

## <sup>13</sup>C NMR in DMSO-d<sub>6</sub>

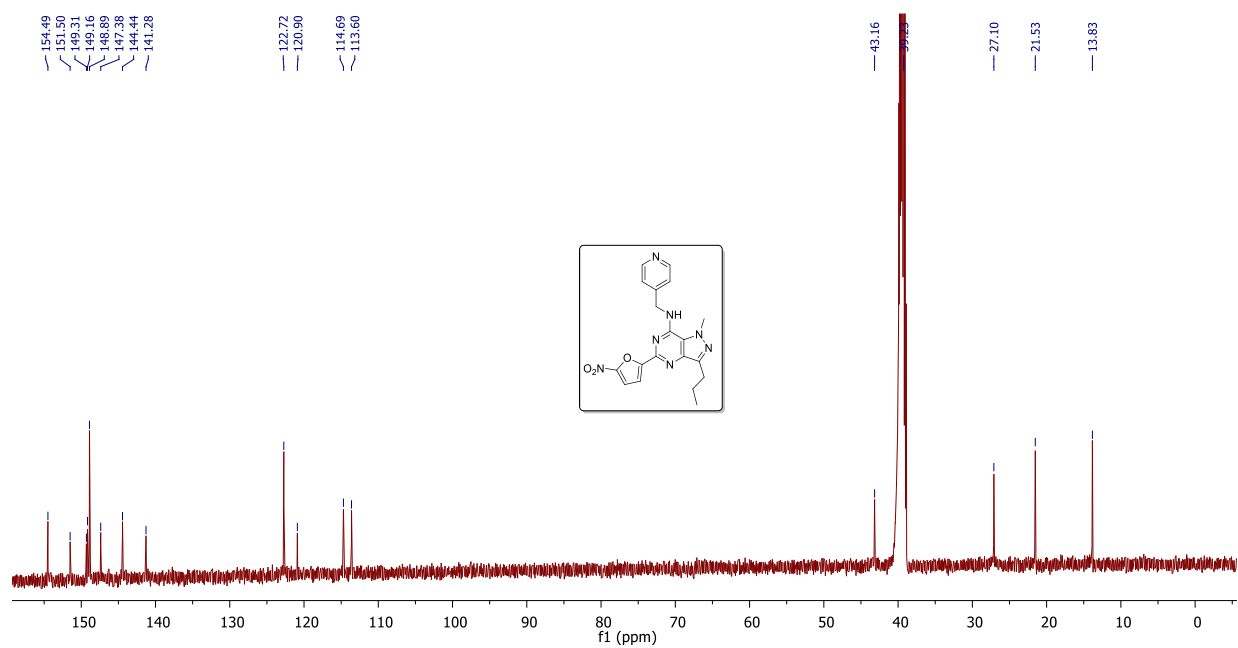



## Qualitative Compound Report

|                               |                   |                      |                        |
|-------------------------------|-------------------|----------------------|------------------------|
| <b>Data File</b>              | GLR-A-54.d        | <b>Sample Name</b>   | GLR-A-54               |
| <b>Sample Type</b>            | Sample            | <b>Position</b>      | Vial 3                 |
| <b>Instrument Name</b>        | Instrument 1      | <b>User Name</b>     |                        |
| <b>Acq Method</b>             | vishal_12-01-13.m | <b>Acquired Time</b> | 09-07-2013 PM 12:31:29 |
| <b>IRM Calibration Status</b> | Success           | <b>DA Method</b>     | daily_report.m         |
| <b>Comment</b>                |                   |                      |                        |

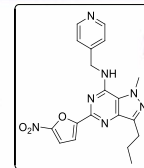

|                       |                             |              |
|-----------------------|-----------------------------|--------------|
| <b>Sample Group</b>   |                             | <b>Info.</b> |
| <b>Acquisition SW</b> | 6200 series TOF/6500 series |              |
| <b>Version</b>        | Q-TOF B.05.01 (B5125)       |              |

## Compound Table

| Compound Label       | RT    | Mass     | Formula       | MFG Formula   | MFG Diff (ppm) | DB Formula    |
|----------------------|-------|----------|---------------|---------------|----------------|---------------|
| Cpd 8: C19 H19 N7 O3 | 0.194 | 393.1547 | C19 H19 N7 O3 | C19 H19 N7 O3 | 0.55           | C19 H19 N7 O3 |

| Compound Label       | m/z     | RT    | Algorithm                 | Mass     |
|----------------------|---------|-------|---------------------------|----------|
| Cpd 8: C19 H19 N7 O3 | 394.162 | 0.194 | Find by Molecular Feature | 393.1547 |

## MFE MS Spectrum

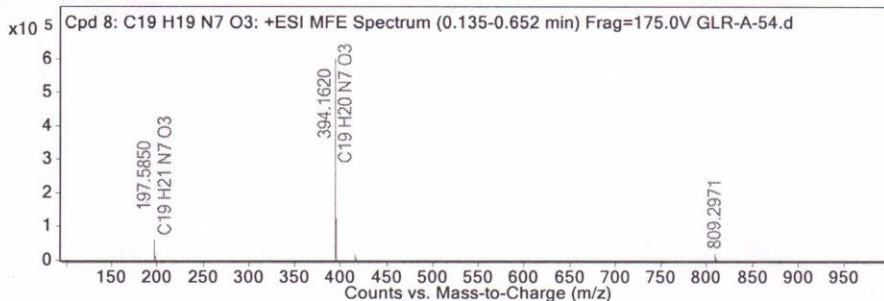

## MS Spectrum Peak List

| m/z      | z | Abund     | Formula          | Ion      |
|----------|---|-----------|------------------|----------|
| 197.585  | 2 | 59301.27  | C19 H21 N7 O3    | (M+2H)+2 |
| 198.086  | 2 | 12752.76  | C19 H21 N7 O3    | (M+2H)+2 |
| 394.162  | 1 | 597924.94 | C19 H20 N7 O3    | (M+H)+   |
| 395.1647 | 1 | 126481.34 | C19 H20 N7 O3    | (M+H)+   |
| 396.1671 | 1 | 16859.99  | C19 H20 N7 O3    | (M+H)+   |
| 416.1439 | 1 | 18440.13  | C19 H19 N7 Na O3 | (M+Na)+  |
| 417.1462 | 1 | 5230.56   | C19 H19 N7 Na O3 | (M+Na)+  |
| 809.2971 | 1 | 21837.68  |                  | (2M+Na)+ |
| 810.3    | 1 | 10253.06  |                  | (2M+Na)+ |
| 811.3001 | 1 | 2686.42   |                  | (2M+Na)+ |

## Predicted Isotope Match Table

| Isotope | m/z      | Calc m/z | Diff (ppm) | Abund % | Calc Abund % | Abund Sum % | Calc Abund Sum % |
|---------|----------|----------|------------|---------|--------------|-------------|------------------|
| 1       | 197.585  | 197.5847 | -1.39      | 100     | 100          | 79.52       | 78.92            |
| 2       | 198.086  | 198.0861 | 0.25       | 21.51   | 23.46        | 17.1        | 18.52            |
| 3       | 198.5878 | 198.5873 | -2.18      | 4.25    | 3.25         | 3.38        | 2.57             |

--- End Of Report ---

# HPLC

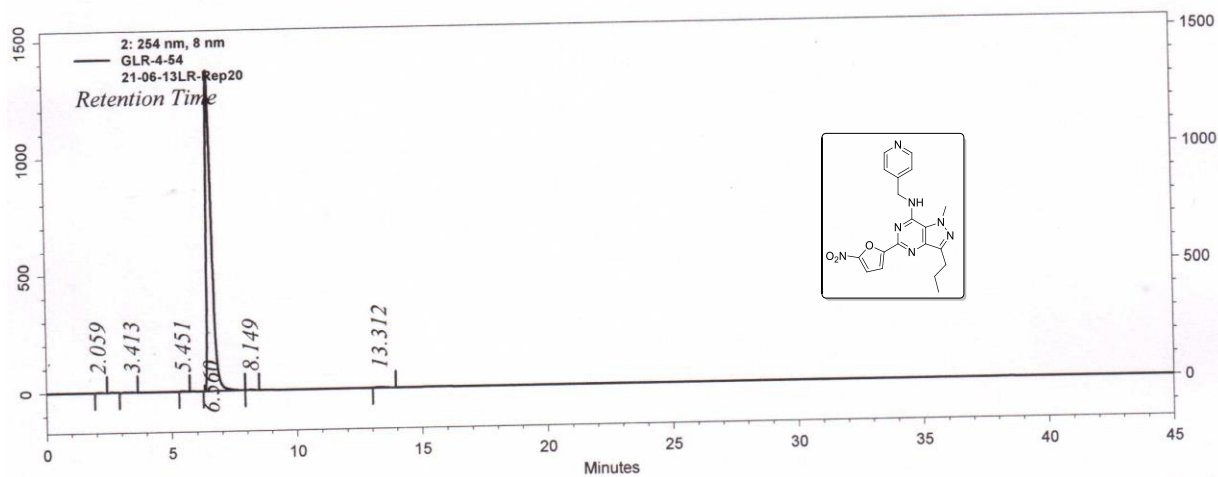

2: 254 nm, 8 nm

| Pk # | Retention Time | Area     | Area % | Height  | Height % |
|------|----------------|----------|--------|---------|----------|
| 1    | 2.059          | 12756    | 0.066  | 1088    | 0.079    |
| 2    | 3.413          | 13676    | 0.070  | 1318    | 0.096    |
| 3    | 5.451          | 19745    | 0.102  | 1856    | 0.135    |
| 4    | 6.560          | 19313911 | 99.371 | 1369377 | 99.410   |
| 5    | 8.149          | 23537    | 0.121  | 1627    | 0.118    |
| 6    | 13.312         | 52458    | 0.270  | 2245    | 0.163    |

|        |  |          |         |         |         |
|--------|--|----------|---------|---------|---------|
| Totals |  | 19436083 | 100.000 | 1377511 | 100.000 |
|--------|--|----------|---------|---------|---------|

# Compound (45)

## <sup>1</sup>H NMR in DMSO-d<sub>6</sub>

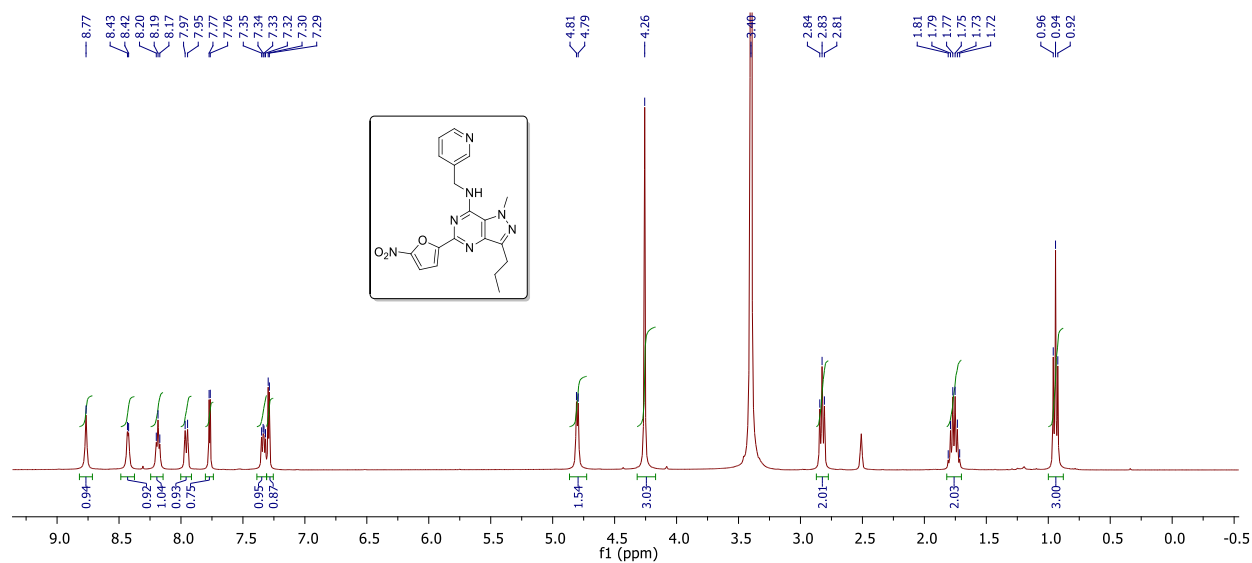

## <sup>13</sup>C NMR in DMSO-d<sub>6</sub>

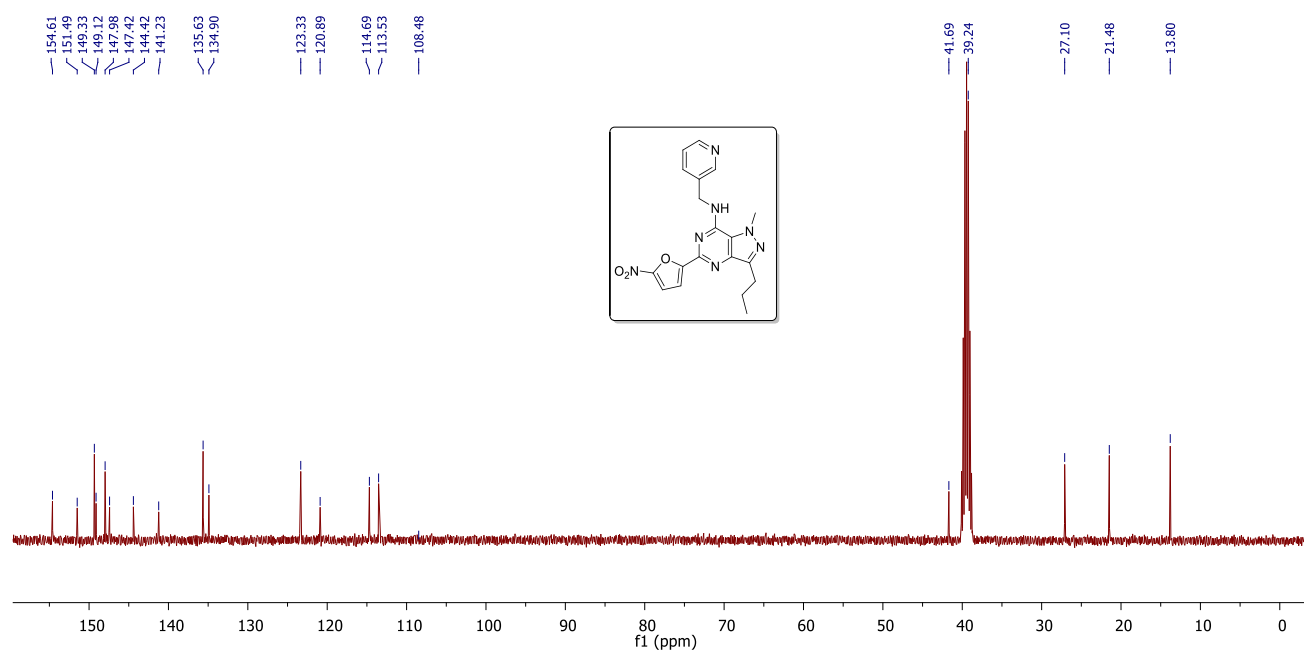

## Qualitative Compound Report

|                               |                   |                      |                       |
|-------------------------------|-------------------|----------------------|-----------------------|
| <b>Data File</b>              | GLR-A-55.d        | <b>Sample Name</b>   | GLR-A-55              |
| <b>Sample Type</b>            | Sample            | <b>Position</b>      | Vial 11               |
| <b>Instrument Name</b>        | Instrument 1      | <b>User Name</b>     |                       |
| <b>Acq Method</b>             | vishal_12-01-13.m | <b>Acquired Time</b> | 09-07-2013 PM 1:09:45 |
| <b>IRM Calibration Status</b> | Success           | <b>DA Method</b>     | daily_report.m        |
| <b>Comment</b>                |                   |                      |                       |

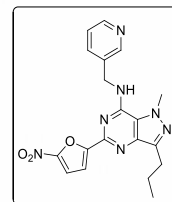

|                       |                             |              |
|-----------------------|-----------------------------|--------------|
| <b>Sample Group</b>   |                             | <b>Info.</b> |
| <b>Acquisition SW</b> | 6200 series TOF/6500 series |              |
| <b>Version</b>        | Q-TOF B.05.01 (B5125)       |              |

## Compound Table

| Compound Label                                                       | RT    | Mass     | Formula                                                       | MFG Formula                                                   | MFG Diff (ppm) | DB Formula                                                    |
|----------------------------------------------------------------------|-------|----------|---------------------------------------------------------------|---------------------------------------------------------------|----------------|---------------------------------------------------------------|
| Cpd 9: C <sub>19</sub> H <sub>19</sub> N <sub>7</sub> O <sub>3</sub> | 0.195 | 393.1552 | C <sub>19</sub> H <sub>19</sub> N <sub>7</sub> O <sub>3</sub> | C <sub>19</sub> H <sub>19</sub> N <sub>7</sub> O <sub>3</sub> | -0.7           | C <sub>19</sub> H <sub>19</sub> N <sub>7</sub> O <sub>3</sub> |

| Compound Label                                                       | m/z      | RT    | Algorithm                 | Mass     |
|----------------------------------------------------------------------|----------|-------|---------------------------|----------|
| Cpd 9: C <sub>19</sub> H <sub>19</sub> N <sub>7</sub> O <sub>3</sub> | 394.1626 | 0.195 | Find by Molecular Feature | 393.1552 |

## MFE MS Spectrum

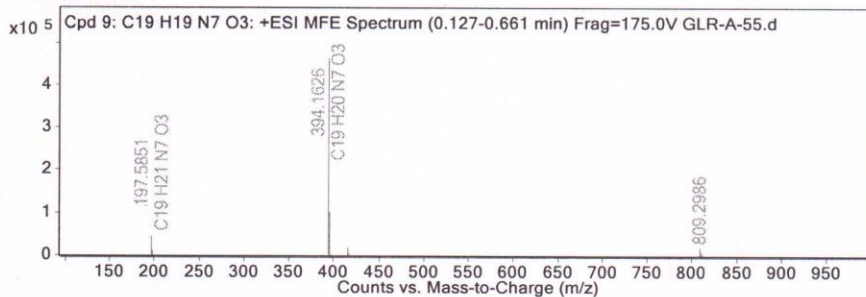

## MS Spectrum Peak List

| m/z      | z | Abund     | Formula                                                         | Ion                   |
|----------|---|-----------|-----------------------------------------------------------------|-----------------------|
| 197.5851 | 2 | 45138.43  | C <sub>19</sub> H <sub>21</sub> N <sub>7</sub> O <sub>3</sub>   | (M+2H) <sup>+</sup> 2 |
| 198.086  | 2 | 9651.31   | C <sub>19</sub> H <sub>21</sub> N <sub>7</sub> O <sub>3</sub>   | (M+2H) <sup>+</sup> 2 |
| 394.1626 | 1 | 461941.72 | C <sub>19</sub> H <sub>20</sub> N <sub>7</sub> O <sub>3</sub>   | (M+H) <sup>+</sup>    |
| 395.1648 | 1 | 101419.98 | C <sub>19</sub> H <sub>20</sub> N <sub>7</sub> O <sub>3</sub>   | (M+H) <sup>+</sup>    |
| 396.1672 | 1 | 14377.99  | C <sub>19</sub> H <sub>20</sub> N <sub>7</sub> O <sub>3</sub>   | (M+H) <sup>+</sup>    |
| 416.1435 | 1 | 19339.75  | C <sub>19</sub> H <sub>19</sub> N <sub>7</sub> NaO <sub>3</sub> | (M+Na) <sup>+</sup>   |
| 417.1465 | 1 | 4140.78   | C <sub>19</sub> H <sub>19</sub> N <sub>7</sub> NaO <sub>3</sub> | (M+Na) <sup>+</sup>   |
| 809.2986 | 1 | 17577.36  |                                                                 | (2M+Na) <sup>+</sup>  |
| 810.3006 | 1 | 8031.12   |                                                                 | (2M+Na) <sup>+</sup>  |
| 811.3009 | 1 | 1677.14   |                                                                 | (2M+Na) <sup>+</sup>  |

## Predicted Isotope Match Table

| Isotope | m/z      | Calc m/z | Diff (ppm) | Abund % | Calc Abund % | Abund Sum % | Calc Abund Sum % |
|---------|----------|----------|------------|---------|--------------|-------------|------------------|
| 1       | 197.5851 | 197.5847 | -1.7       | 100     | 100          | 80.59       | 78.92            |
| 2       | 198.086  | 198.0861 | 0.24       | 21.38   | 23.46        | 17.23       | 18.52            |
| 3       | 198.5871 | 198.5873 | 0.98       | 2.71    | 3.25         | 2.18        | 2.57             |

--- End Of Report ---

# HPLC

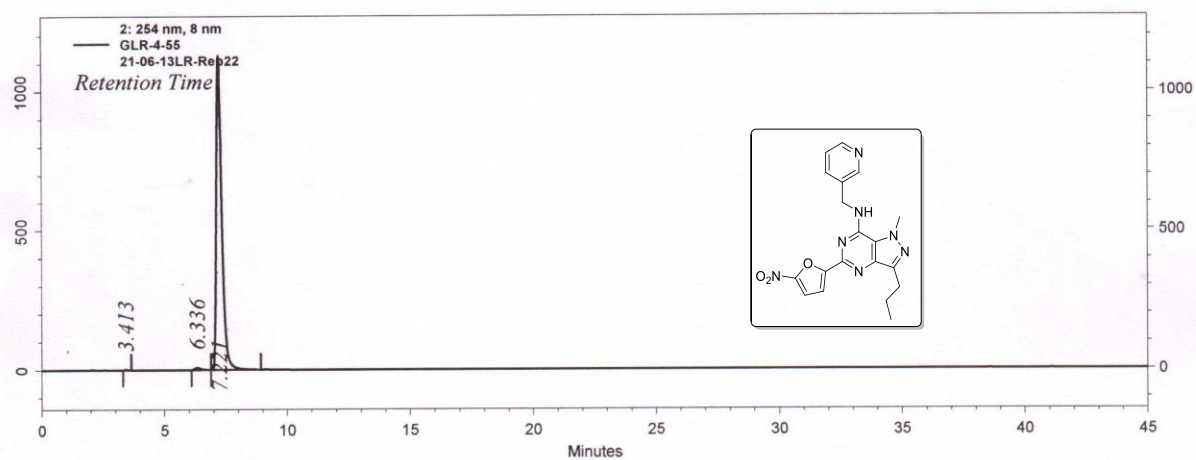

2: 254 nm, 8 nm

| Pk #   | Retention Time | Area     | Area %  | Height  | Height % |
|--------|----------------|----------|---------|---------|----------|
| 1      | 3.413          | 12013    | 0.069   | 1712    | 0.150    |
| 2      | 6.336          | 124836   | 0.718   | 7744    | 0.680    |
| 3      | 7.221          | 17260308 | 99.213  | 1129344 | 99.170   |
| Totals |                | 17397157 | 100.000 | 1138800 | 100.000  |

# Compound (46)

<sup>1</sup>H NMR in CDCl<sub>3</sub>

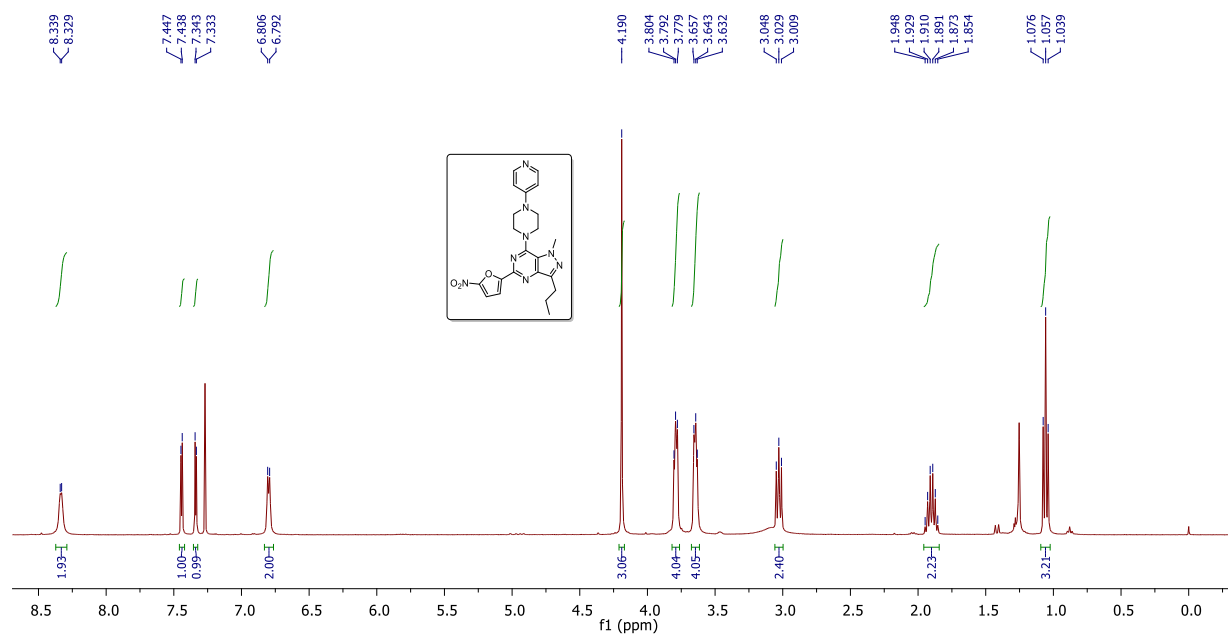

<sup>13</sup>C NMR in CDCl<sub>3</sub>

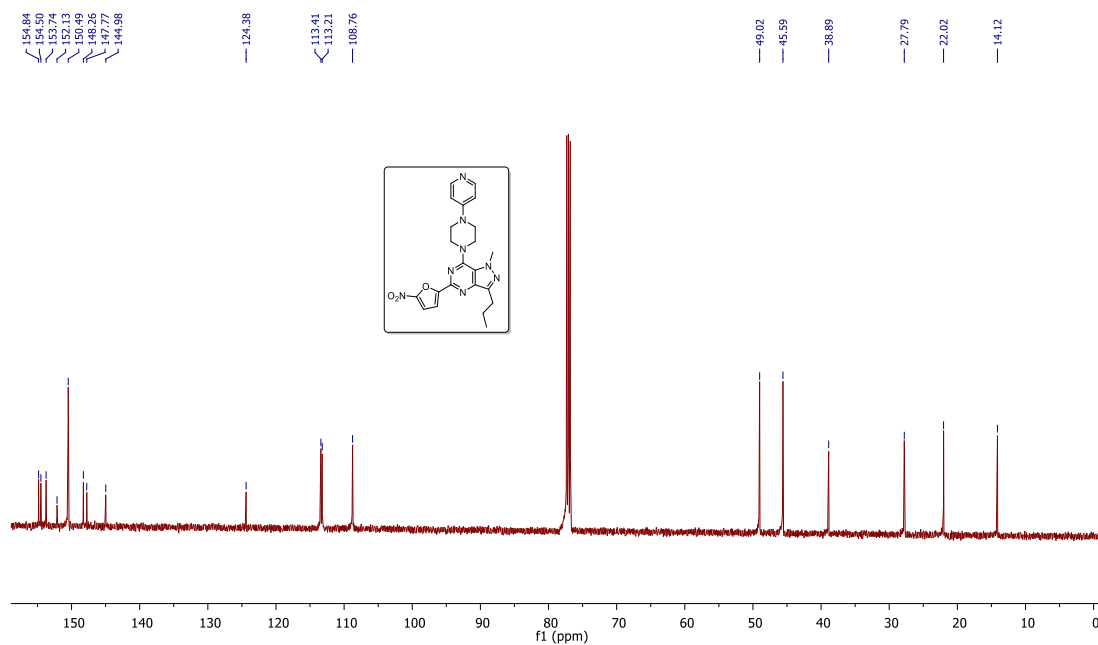



## HRMS

## Qualitative Compound Report

|                               |                 |                      |                        |
|-------------------------------|-----------------|----------------------|------------------------|
| <b>Data File</b>              | GLR-A-53.d      | <b>Sample Name</b>   | GLR-A-53               |
| <b>Sample Type</b>            | Sample          | <b>Position</b>      | Vial 8                 |
| <b>Instrument Name</b>        | Instrument 1    | <b>User Name</b>     |                        |
| <b>Acq Method</b>             | visha12-01-13.m | <b>Acquired Time</b> | 09-07-2013 PM 12:55:56 |
| <b>IRM Calibration Status</b> | Success         | <b>DA Method</b>     | daily_report.m         |
| <b>Comment</b>                |                 |                      |                        |

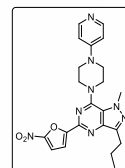

|                       |                             |              |
|-----------------------|-----------------------------|--------------|
| <b>Sample Group</b>   |                             | <b>Info.</b> |
| <b>Acquisition SW</b> | 6200 series TOF/6500 series |              |
| <b>Version</b>        | Q-TOF B.05.01 (B5125)       |              |

## Compound Table

| Compound Label        | RT    | Mass     | Formula       | MFG Formula   | MFG Diff (ppm) | DB Formula    |
|-----------------------|-------|----------|---------------|---------------|----------------|---------------|
| Cpd 14: C22 H24 N8 O3 | 0.196 | 448.1968 | C22 H24 N8 O3 | C22 H24 N8 O3 | 0.8            | C22 H24 N8 O3 |

| Compound Label        | m/z      | RT    | Algorithm                 | Mass     |
|-----------------------|----------|-------|---------------------------|----------|
| Cpd 14: C22 H24 N8 O3 | 449.2039 | 0.196 | Find by Molecular Feature | 448.1968 |

## MFE MS Spectrum

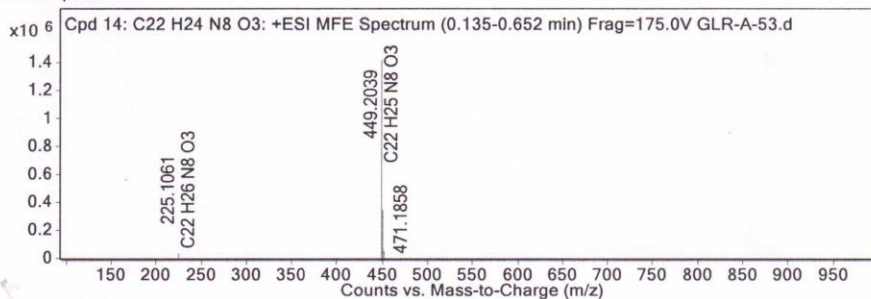

## MS Spectrum Peak List

| m/z      | z | Abund      | Formula       | Ion      |
|----------|---|------------|---------------|----------|
| 225.1061 | 2 | 34854.21   | C22 H26 N8 O3 | (M+2H)+2 |
| 225.6072 | 2 | 7801.15    | C22 H26 N8 O3 | (M+2H)+2 |
| 226.1092 | 2 | 2365.38    | C22 H26 N8 O3 | (M+2H)+2 |
| 449.2039 | 1 | 1414743.25 | C22 H25 N8 O3 | (M+H)+   |
| 450.2073 | 1 | 346527.56  | C22 H25 N8 O3 | (M+H)+   |
| 451.2093 | 1 | 49575.61   | C22 H25 N8 O3 | (M+H)+   |
| 452.212  | 1 | 5524.13    | C22 H25 N8 O3 | (M+H)+   |
| 453.2119 | 1 | 839.33     | C22 H25 N8 O3 | (M+H)+   |
| 471.1858 | 1 | 2462.44    |               | (M+Na)+  |
| 472.1885 | 1 | 1203.29    |               | (M+Na)+  |

## Predicted Isotope Match Table

| Isotope | m/z      | Calc m/z | Diff (ppm) | Abund % | Calc Abund % | Abund Sum % | Calc Abund Sum % |
|---------|----------|----------|------------|---------|--------------|-------------|------------------|
| 1       | 225.1061 | 225.1058 | -0.96      | 100     | 100          | 76.87       | 75.9             |
| 2       | 225.6072 | 225.6072 | -0.02      | 22.38   | 27.13        | 17.21       | 20.59            |
| 3       | 226.1092 | 226.1085 | -3.08      | 6.79    | 4.16         | 5.22        | 3.16             |
| 4       | 226.6073 | 226.6097 | 10.61      | 0.92    | 0.46         | 0.71        | 0.35             |

# HPLC

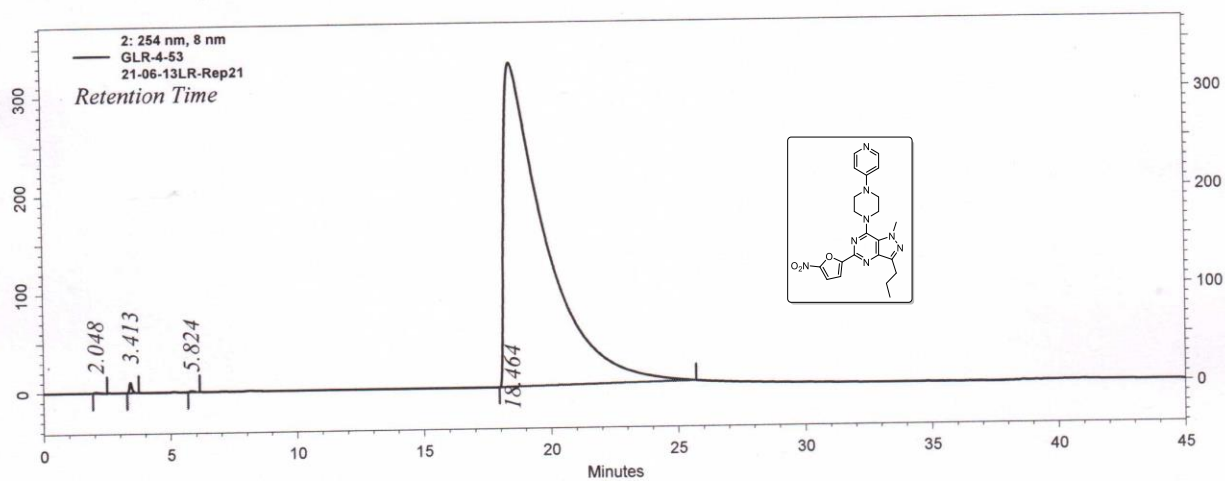

2: 254 nm, 8 nm

| Pk #   | Retention Time | Area     | Area %  | Height | Height % |
|--------|----------------|----------|---------|--------|----------|
| 1      | 2.048          | 15484    | 0.042   | 863    | 0.252    |
| 2      | 3.413          | 75574    | 0.204   | 10325  | 3.017    |
| 3      | 5.824          | 10940    | 0.030   | 966    | 0.282    |
| 4      | 18.464         | 36973719 | 99.725  | 330017 | 96.448   |
| Totals |                | 37075717 | 100.000 | 342171 | 100.000  |

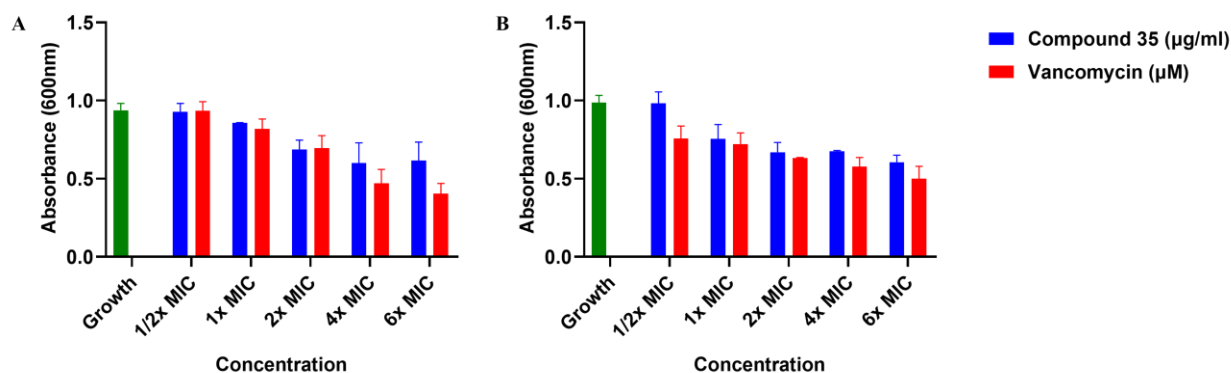

**Figure S1.** The graph represents the preformed biofilm disruption at different concentrations of the compound **35** (1/2x, 1x, 2x, 4x and 6x MIC) while vancomycin is used as drug control at respective concentrations. The untreated cells or growth control in (A) *S. aureus* and (B) MRSA show the biofilm formation ability. In (A) *S. aureus*, compound **35** exhibits the potency of disrupting biofilm at 4x and 6x of MIC (maximum 30%) while the drug control vancomycin shows 40-50% disruption ability at 4x and 6x of MIC. In (B) MRSA, compound 35 exhibits similar ability at 4x and 6x of MIC compared to the drug control vancomycin. The figure is representative of three experiments.

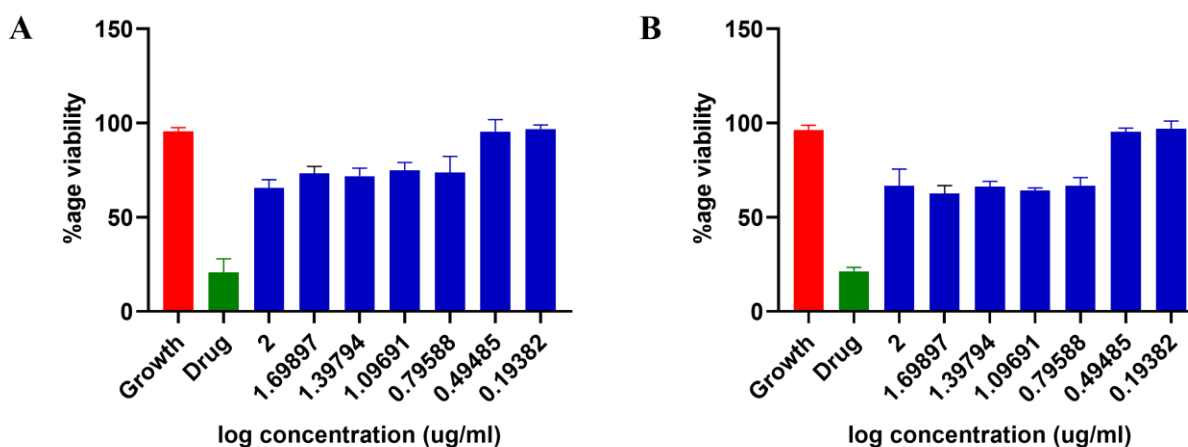

**Figure S2.** The compound **35** (blue bars) shows >50% growth of macrophage cells RAW264.7 at all concentrations ranging from 100μg/ml to 1.5μg/ml when exposed for A) 48 h and B) 72 h. The untreated cells (red) act as growth control. Drug control (green), Doxorubicin was used at a concentration of 10μM which showed a greater reduction in the growth of cells.

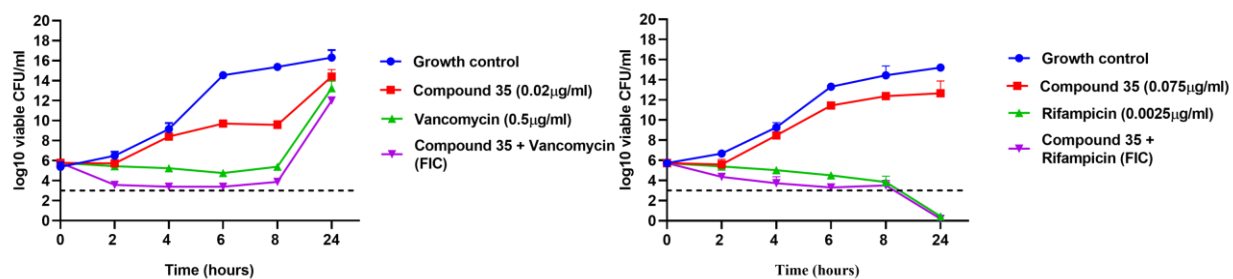

**Figure S3.** Killing efficacy of synergistic combinations of (A) compound **35** with vancomycin in *S. aureus* and (B) compound **35** with rifampicin in MRSA strains. Sub-inhibitory concentrations of vancomycin (0.5 $\mu$ g/ml), and compound **35** (0.02 $\mu$ g/ml) in *S. aureus* and rifampicin (0.0025 $\mu$ g/ml) and compound **35** (0.075 $\mu$ g/ml) in MRSA were used. The untreated growth control was used to compare the data.

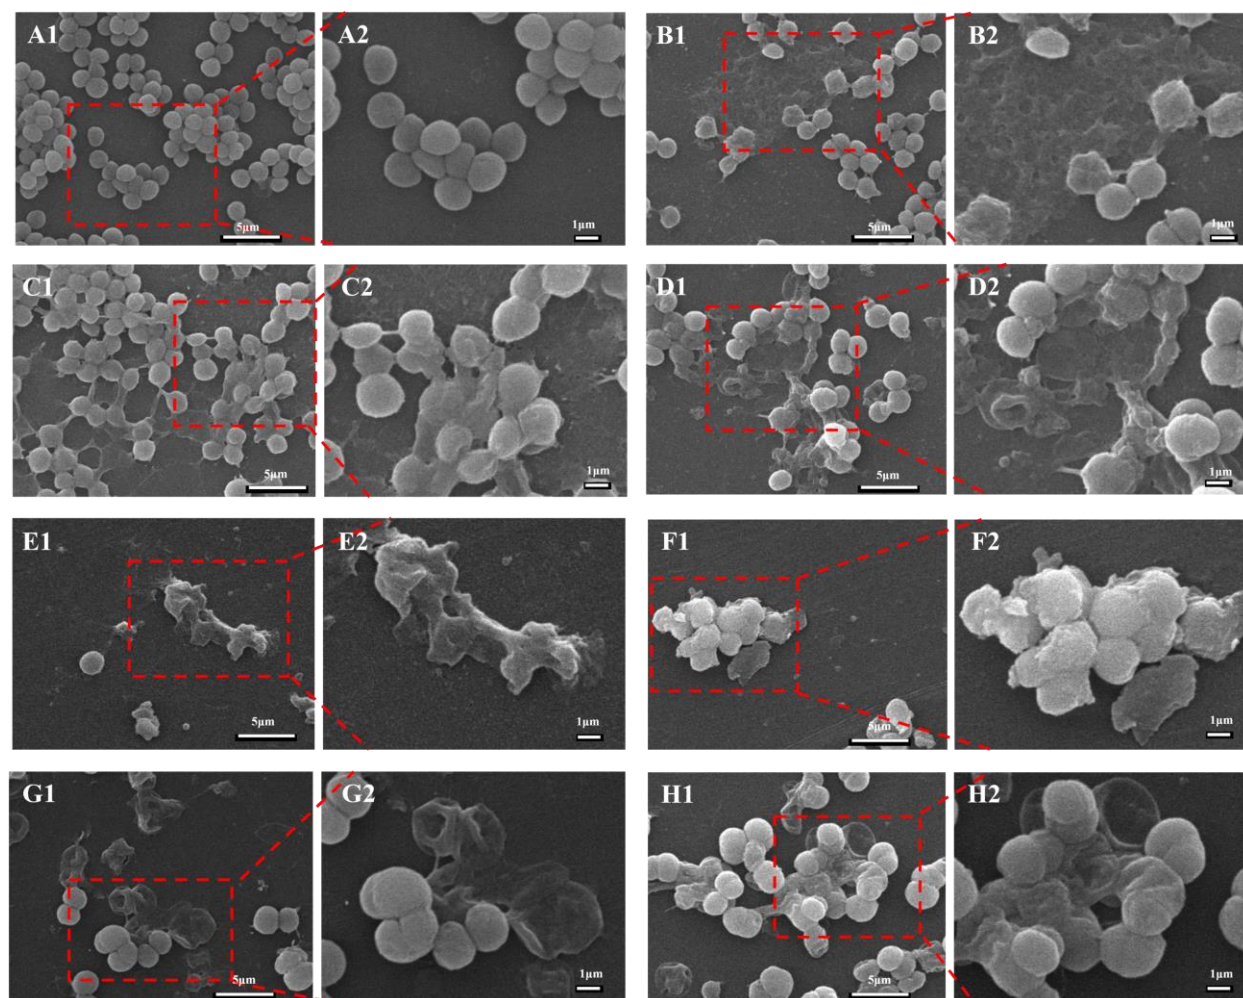



**Figure S4.** Scanning electron micrographs of MRSA at 2 hours of incubation with compound **35**, including images at 5 $\mu$ m and 1 $\mu$ m scales, with the 1 $\mu$ m scale image providing a magnified view of a portion of the 5 $\mu$ m scale image. Panels A1 and A2 depict the morphology of untreated cells, which appear in clusters. The treated samples with compound **35** at 1x MIC (B1, B2), 2x MIC (C1, C2), and 4x MIC (D1, D2) exhibit concentration-dependent morphological disruption. The drug controls vancomycin 1x MIC (E1, E2), 2x MIC (F1, F2) and daptomycin 1x MIC (G1, G2), 2x MIC (H1, H2) were used which demonstrated significant disruption at both concentrations.

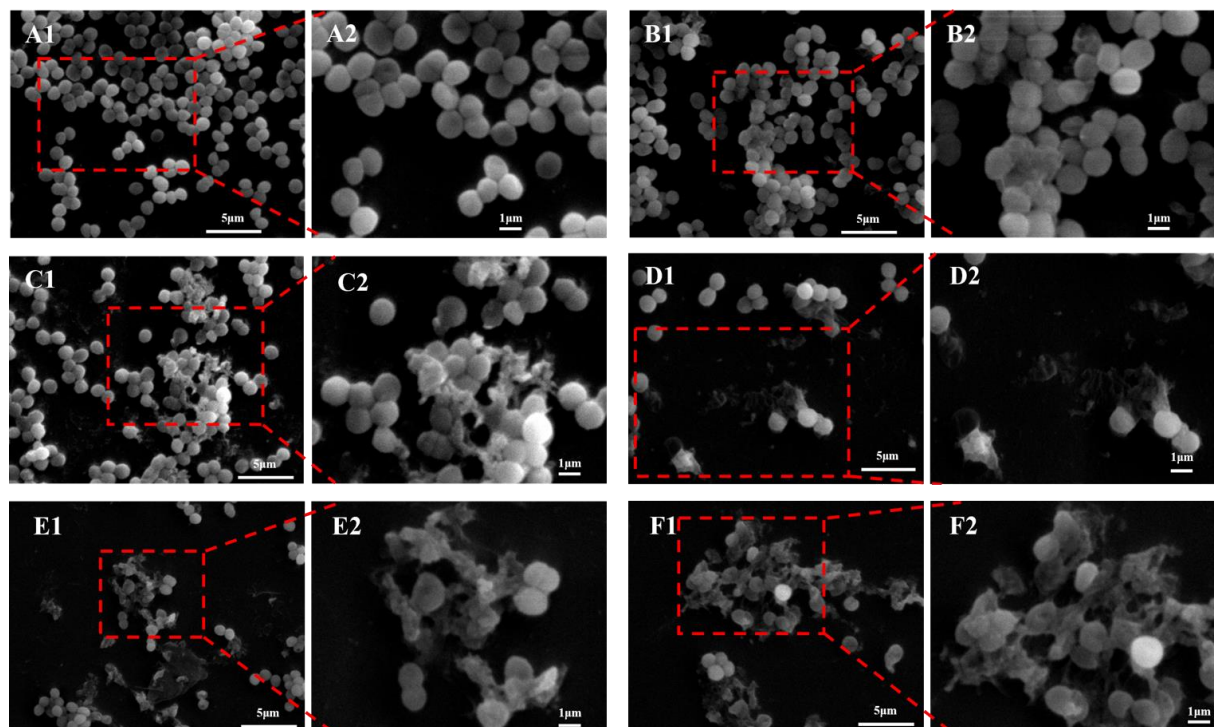

**Figure S5.** Scanning electron micrographs of MRSA at 6 hours of incubation with compound **35**, including images at 5 $\mu$ m and 1 $\mu$ m scales, with the 1 $\mu$ m scale image providing a magnified view of a portion of the 5 $\mu$ m scale image. Panels A1 and A2 depict the morphology of untreated cells, which appear in clusters. The treated samples with compound **35** at 1x MIC (B1, B2), 2x MIC (C1, C2), and 4x MIC (D1, D2) exhibit concentration-dependent morphological disruption. The vancomycin control demonstrates significant disruption at both concentrations, 1x MIC (E1, E2) and 2x MIC (F1, F2).

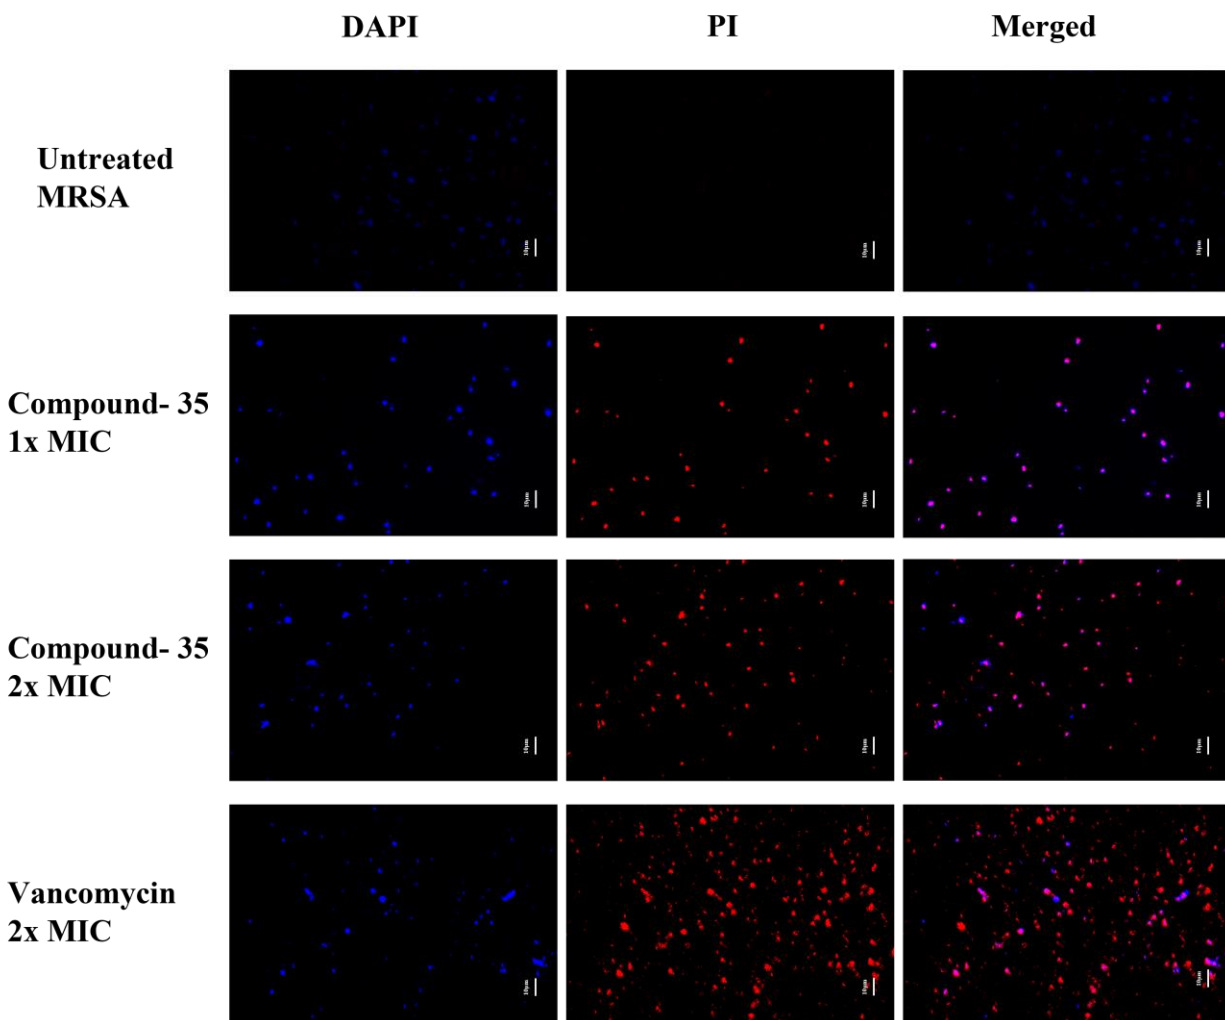

**Figure S6.** Fluorescence micrographs of MRSA stained with DAPI and PI after treatment with compound **35** at 1X and 2X MIC. Vancomycin, at 2X MIC, served as a positive control. In the blank control (untreated bacteria), DAPI staining was present without PI staining, signifying intact bacterial membranes. Conversely, treatment with compound **35** showed intense blue (DAPI) and red (PI) fluorescence, indicating a compromise in bacterial cell wall integrity. Scale bar: 10  $\mu$ m.
